# Supplementary material for: A Comparative Analysis of RNAi Trigger Uptake and Distribution in Mosquito Vectors of Disease
Source: MDPI journal article supplement (doi:10.3390/insects14060556), 2023-06-15

# Supplementary File – Supplementary Tables & Figures for: A Comparative Analysis of RNAi Trigger Uptake and Distribution in Mosquito Vectors of Disease

Paul M. Airs <sup>1</sup>, Katherine E. Kudrna <sup>1</sup>, Bailey Lubinski <sup>1</sup>, Yashdeep Phanse <sup>1</sup> and Lyric C. Bartholomay <sup>1,2,\*</sup>

<sup>1</sup> Department of Pathobiological Sciences, University of Wisconsin—Madison, Madison, WI, 53706, USA

<sup>2</sup> Midwest Center of Excellence for Vector-Borne Diseases, University of Wisconsin—Madison, Madison, WI, USA

\* Correspondence: lyric.bartholomay@wisc.edu

## Contents

|                                                                                                         |    |
|---------------------------------------------------------------------------------------------------------|----|
| Table S1 – Primers used in study .....                                                                  | 2  |
| Supplementary Figures .....                                                                             | 2  |
| Bio-distribution of fluorescently labelled iLacZ in mosquitoes.....                                     | 2  |
| Exposure by Intrathoracic Injection .....                                                               | 3  |
| Figure S1 – Adult female <i>Ae. aegypti</i> - intrathoracic injection.....                              | 3  |
| Figure S2 – Adult female <i>An. gambiae</i> - intrathoracic injection .....                             | 10 |
| Figure S3 – Adult female <i>Cx. Pipiens</i> - intrathoracic injection .....                             | 17 |
| Figure S4 – Adult female <i>Ae. aegypti</i> 25-48 hours post blood/meal - intrathoracic injection ..... | 25 |
| Figure S5 – Adult female <i>An. gambiae</i> 25-48 hours post blood/meal - intrathoracic injection.....  | 29 |
| Figure S6 – Adult female <i>Cx. pipiens</i> 25-48 hours post blood/meal - intrathoracic injection ..... | 33 |
| Figure S7 – 4 <sup>th</sup> instar <i>Ae. Aegypti</i> - intrathoracic injection .....                   | 37 |
| Figure S8 – 4 <sup>th</sup> instar <i>An. gambiae</i> – intrathoracic injection.....                    | 39 |
| Figure S9 – 4 <sup>th</sup> instar <i>Cx. pipiens</i> – intrathoracic injection .....                   | 41 |
| Adult exposure by Topical Application .....                                                             | 44 |
| Figure S10 – Adult female <i>Ae. aegypti</i> – topical exposure.....                                    | 44 |
| Figure S11 – Adult female <i>An. gambiae</i> – topical exposure.....                                    | 47 |

|                                                                                                                       |    |
|-----------------------------------------------------------------------------------------------------------------------|----|
| Figure S12 – Adult female <i>Cx. pipiens</i> – topical exposure.....                                                  | 49 |
| Adult exposure <i>Per os</i> .....                                                                                    | 53 |
| Figure S13 – Adult female <i>Ae. aegypti</i> – <i>per os</i> .....                                                    | 53 |
| Figure S14 – Adult female <i>Cx. pipiens</i> – <i>per os</i> .....                                                    | 58 |
| Larval exposure by Soaking.....                                                                                       | 63 |
| Figure S15 – 1 <sup>st</sup> instar <i>Ae. aegypti</i> - soaking.....                                                 | 63 |
| Figure S16 – Stability of iLacZ in sucrose meal following exposure to <i>Ae. aegypti</i> in insectary conditions..... | 65 |
| Figure S17 – Confocal Z/stack of <i>Ae. aegypti</i> ovary 24 hours post peritoneal exposure of fluorescent/iLacZ..... | 66 |
| Figure S18 – Northern blot time-course of C6/36 cells following iLacZ exposure.....                                   | 67 |

## Table S1 – Primers used in study

Various LacZ PCR products were produced as template for production of dsRNA and siRNA. For RNAi trigger synthesis and northern blot probe synthesis the T7 sequence (TAATACGACTCACTATAGGG) was added to the 5' of both the forward and reverse primers.

| Product                                                    | Primer Name | Direction | Sequence                  | Product Size |
|------------------------------------------------------------|-------------|-----------|---------------------------|--------------|
| LacZ 377†                                                  | LacZ 377 F  | Forward   | CTTTTGCTGGCCTTTTGCTC      | 377          |
|                                                            | LacZ 377 R  | Reverse   | CGTAATCATGGTCATAGCTGTTTCC |              |
| LacZ 200                                                   | LacZ 200 R  | Reverse   | GCATTAATGAATCGGCCAAC      | 199          |
| LacZ 400‡                                                  | LacZ 400 R  | Reverse   | GTCACCTAAATAGCTTGGCGTAA   | 395          |
| LacZ 600                                                   | LacZ 600 R  | Reverse   | GTTTTCCCAGTCACGACGTT      | 602          |
| † = PCR products used for northern blot probe generation   |             |           |                           |              |
| ‡ = PCR product used for fluorescent labeling experiments. |             |           |                           |              |
| * The same F primer was used for all iLacZ products        |             |           |                           |              |

## Supplementary Figures

### Bio-distribution of fluorescently labelled iLacZ in mosquitoes

Supplementary figures 1 – 15 include representative images taken of live mosquito tissues dissected in PBS and imaged following exposure to fluorescent Cy/3 labelled iLacZ (377 bp). Tables are formatted showing bright field, iLacZ (Cy3 fluorescence) and merged image panels. Image panel descriptions are formatted as

‘Region / Tissue or cell types / Hours Post Exposure (HPE). \* Tissues or cells of interest containing iLacZ signal’. Figures are ordered into subsections by exposure route (in bold) with each figure representing a single species at a single life/stage. Due to the number of conditions images have not been included for every tissue for every time/point in every experiment but represent an image collection reference for Table 1.

**Exposure by Intrathoracic Injection**

Figure S1 – Adult female *Ae. aegypti* - intrathoracic injection

| Description                                                      | Bright Field                                                                        | RNAi trigger                                                                         | Merge                                                                                |
|------------------------------------------------------------------|-------------------------------------------------------------------------------------|--------------------------------------------------------------------------------------|--------------------------------------------------------------------------------------|
| Head / injection site / 24 HPE                                   | 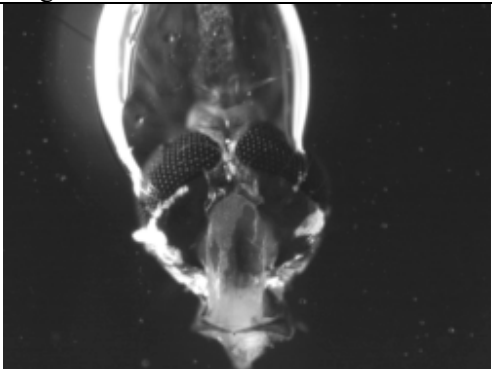  |   |   |
| Thorax / cuticle, muscle* / 24 HPE<br><br>* hemocytes with iLacZ |  |  |  |

|                                                                                                                               |                                                                                     |                                                                                      |                                                                                      |
|-------------------------------------------------------------------------------------------------------------------------------|-------------------------------------------------------------------------------------|--------------------------------------------------------------------------------------|--------------------------------------------------------------------------------------|
| <p>Thorax / Cuticle, wing, muscle, fat body* / 72 HPE</p> <p>* Pericardial cells with iLacZ, auto-fluorescence in cuticle</p> | 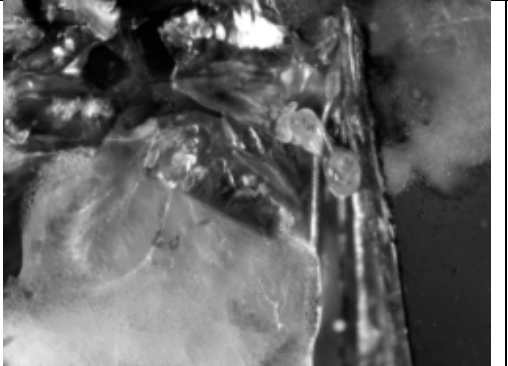  |   |   |
| <p>Abdomen / cuticle, fat body * / 72 HPE</p> <p>* pericardial cells with iLacZ</p>                                           |   |   |   |
| <p>Abdomen / Cuticle, fat body * / 24 HPE</p> <p>* pericardial cells, nerve cord ganglia with iLacZ</p>                       |  |  |  |



|                                                                                    |                                                                                     |                                                                                      |                                                                                      |
|------------------------------------------------------------------------------------|-------------------------------------------------------------------------------------|--------------------------------------------------------------------------------------|--------------------------------------------------------------------------------------|
| Abdomen / Fat body & hemocytes* / 120 HPE<br><br>* hemocytes with iLacZ            | 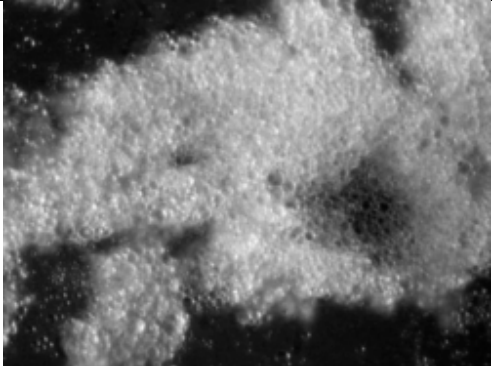  |   |   |
| Abdomen / Malpighian tubule and tracheoles* / 72 HPE<br><br>* hemocytes with iLacZ |   |   |   |
| Leg / Cuticle & hemocytes* / 72 HPE<br><br>* hemocytes with iLacZ                  |  |  |  |

|                                                                                                                |                                                                                     |                                                                                      |                                                                                      |
|----------------------------------------------------------------------------------------------------------------|-------------------------------------------------------------------------------------|--------------------------------------------------------------------------------------|--------------------------------------------------------------------------------------|
| <p>Abdomen / Anterior<br/>alimentary tract / 72 HPE</p>                                                        | 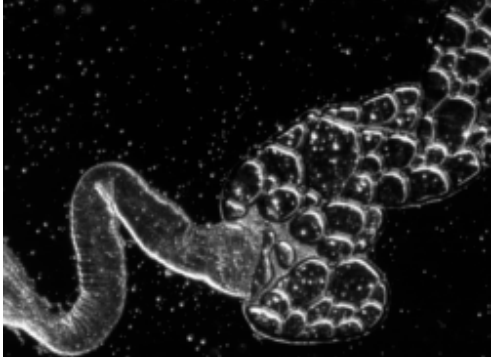  |   |   |
| <p>Abdomen / Central<br/>alimentary tract / 120 HPE</p>                                                        |   |   |   |
| <p>Abdomen / Posterior<br/>alimentary tract * / 72<br/>HPE</p> <p>* hemocytes and gut<br/>lumen with iLacZ</p> |  |  |  |

|                                                                                                       |                                                                                     |                                                                                      |                                                                                      |
|-------------------------------------------------------------------------------------------------------|-------------------------------------------------------------------------------------|--------------------------------------------------------------------------------------|--------------------------------------------------------------------------------------|
| <p>Abdomen / Posterior alimentary tract * / 72 HPE</p> <p>* hemocytes and rectum lumen with iLacZ</p> | 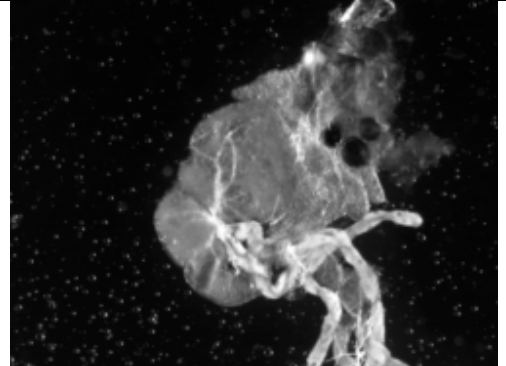  |   |   |
| <p>Abdomen / Ovary * / 24 HPE</p> <p>* hemocytes with iLacZ</p>                                       |   |   |   |
| <p>Abdomen Ovary * / 120 HPE</p> <p>* Oocytes with iLacZ</p>                                          |  |  |  |

|                                                                                                                |                                                                                     |                                                                                      |                                                                                      |
|----------------------------------------------------------------------------------------------------------------|-------------------------------------------------------------------------------------|--------------------------------------------------------------------------------------|--------------------------------------------------------------------------------------|
| <p>Un-injected negative controls for autofluorescence</p> <p>Head with autofluorescence in cuticle</p>         |   |   |   |
| <p>Un-injected negative controls for autofluorescence</p> <p>Abdomen with autofluorescence in soft cuticle</p> |   |   |   |
| <p>Un-injected negative controls for autofluorescence</p> <p>Malpighian tubules</p>                            |  |  |  |



|                                                                                                                                      |                                                                                     |                                                                                      |                                                                                      |
|--------------------------------------------------------------------------------------------------------------------------------------|-------------------------------------------------------------------------------------|--------------------------------------------------------------------------------------|--------------------------------------------------------------------------------------|
| <p>Un-injected negative controls for autofluorescence</p> <p>Midgut</p>                                                              |   |   |   |
| <p>Un-injected negative controls for autofluorescence</p> <p>Ovaries with tracheole autofluorescence</p>                             |   |   |   |
| <p>Un-injected negative controls for autofluorescence</p> <p>Fat body &amp; hemocytes with autofluorescence (possibly tracheole)</p> |  |  |  |

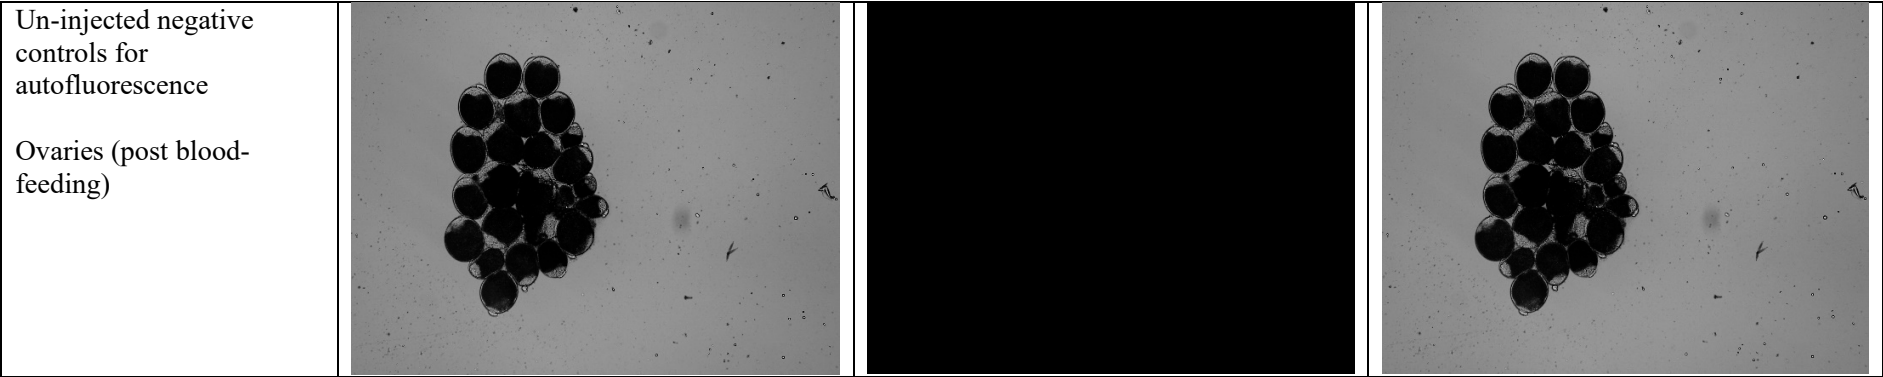

Figure S2 – Adult female *An. gambiae* - intrathoracic injection

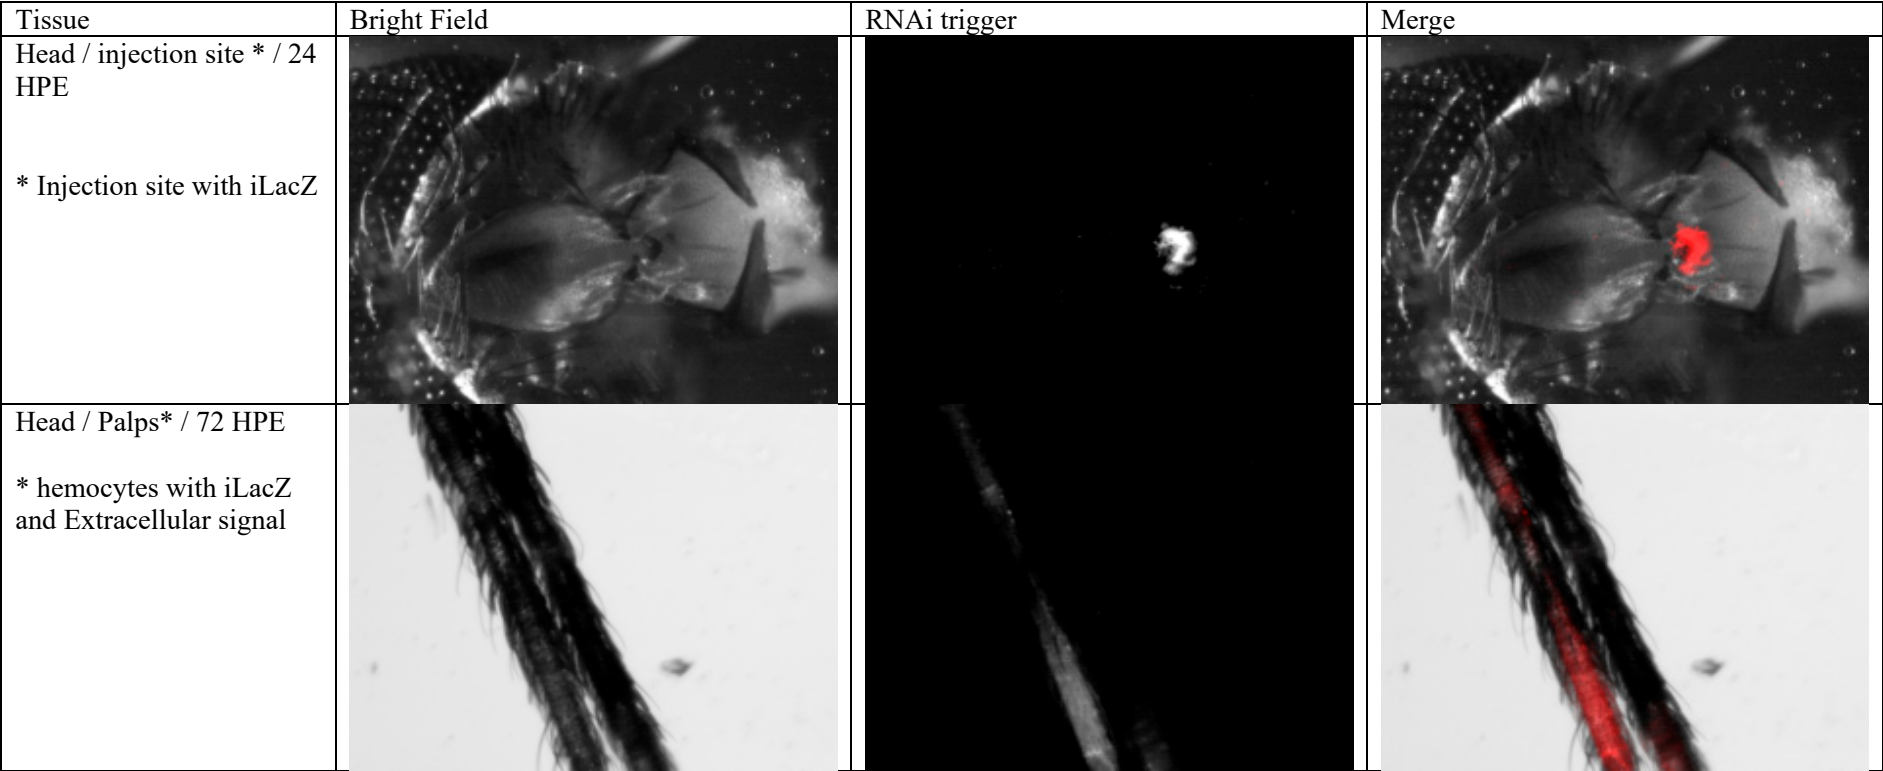

|                                                                                                                     |                                                                                     |                                                                                      |                                                                                      |
|---------------------------------------------------------------------------------------------------------------------|-------------------------------------------------------------------------------------|--------------------------------------------------------------------------------------|--------------------------------------------------------------------------------------|
| <p>Thorax / Cuticle, muscle /<br/>24 HPE</p> <p>* auto-fluorescence in<br/>cuticle and hemocytes<br/>with iLacZ</p> | 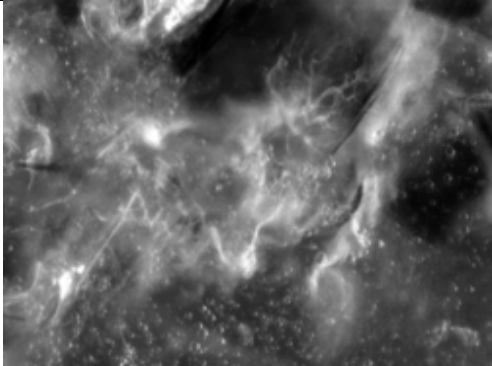  |   |   |
| <p>Thorax / Muscle and<br/>cuticle / 24 HPE</p> <p>* Auto-fluorescence in<br/>cuticle</p>                           |   |   |   |
| <p>Abdomen / Cuticle * / 72<br/>HPE</p> <p>* Pericardial cells with<br/>iLacZ</p>                                   |  |  |  |

|                                                                                                   |                                                                                     |                                                                                      |                                                                                      |
|---------------------------------------------------------------------------------------------------|-------------------------------------------------------------------------------------|--------------------------------------------------------------------------------------|--------------------------------------------------------------------------------------|
| <p>Abdomen / Cuticle, fat body* / 72 HPE</p> <p>* pericardial cells with iLacZ</p>                |   |   |   |
| <p>Abdomen / Fat body, hemocytes* / 24 HPE</p> <p>* hemocytes and pericardial cell with iLacZ</p> |   |   |   |
| <p>Abdomen / Malpighian tubules * / 72 HPE</p> <p>* hemocytes with iLacZ</p>                      |  |  |  |



|                                                                       |                                                                                     |                                                                                      |                                                                                      |
|-----------------------------------------------------------------------|-------------------------------------------------------------------------------------|--------------------------------------------------------------------------------------|--------------------------------------------------------------------------------------|
| <p>Abdomen / Diverticula * / 72 HPE</p> <p>* Weak signal in lumen</p> | 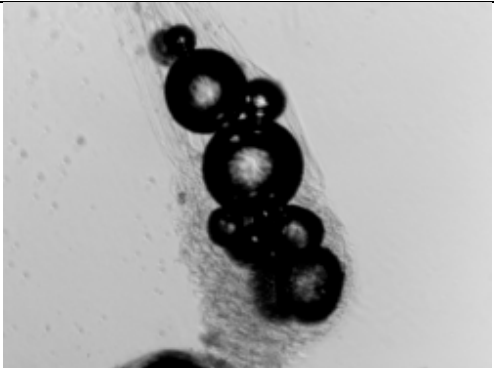  |   |   |
| <p>Abdomen / Diverticula * / 72 HPE</p> <p>* Weak signal in lumen</p> |   |   |   |
| <p>Abdomen / Central alimentary tract / 24 HPE</p>                    |  |  |  |

|                                                                                                                       |                                                                                     |                                                                                      |                                                                                      |
|-----------------------------------------------------------------------------------------------------------------------|-------------------------------------------------------------------------------------|--------------------------------------------------------------------------------------|--------------------------------------------------------------------------------------|
| <p>Abdomen / Central alimentary tract * / 24 HPE</p> <p>* signal in lumen</p>                                         | 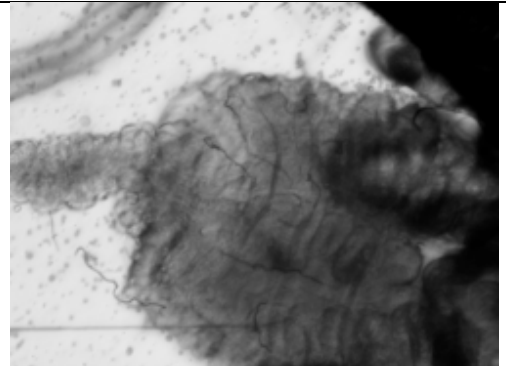  |   |   |
| <p>Abdomen / Alimentary tract * / 72 HPE</p> <p>* hemocytes with iLacZ, Extracellular signal in hindgut lumen</p>     |   |   |   |
| <p>Abdomen / Alimentary tract, cuticle 72 HPE</p> <p>* hemocytes with iLacZ, Extracellular signal in rectum lumen</p> |  |  |  |

|                                                                                                               |                                                                                     |                                                                                      |                                                                                      |
|---------------------------------------------------------------------------------------------------------------|-------------------------------------------------------------------------------------|--------------------------------------------------------------------------------------|--------------------------------------------------------------------------------------|
| <p>Abdomen / Ovary * / 24<br/>HPE</p> <p>* hemocytes and oocytes<br/>with iLacZ</p>                           | 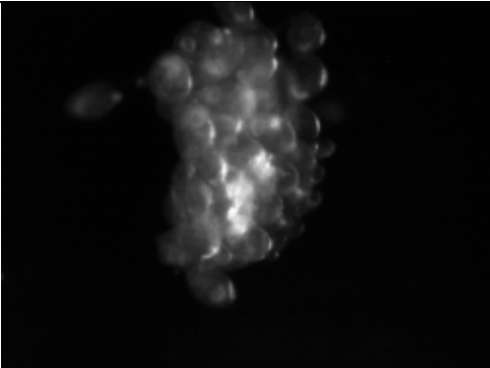  |   |   |
| <p>Un-injected negative<br/>controls for<br/>autofluorescence</p> <p>Abdomen with no<br/>autofluorescence</p> |   |   |   |
| <p>Un-injected negative<br/>controls for<br/>autofluorescence</p> <p>Head with autofluorescence</p>           |  |  |  |

|                                                                                                                                      |                                                                                     |                                                                                      |                                                                                      |
|--------------------------------------------------------------------------------------------------------------------------------------|-------------------------------------------------------------------------------------|--------------------------------------------------------------------------------------|--------------------------------------------------------------------------------------|
| <p>Un-injected negative controls for autofluorescence</p> <p>Leg with cuticle autofluorescence</p>                                   | 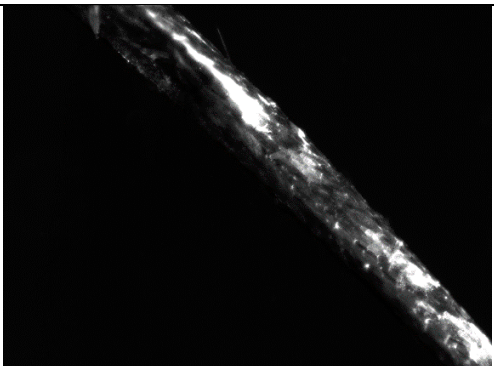  |   |   |
| <p>Un-injected negative controls for autofluorescence</p> <p>Thorax with cuticle autofluorescence</p>                                |   |   |   |
| <p>Un-injected negative controls for autofluorescence</p> <p>Ovaries and Malphigian tubules with autofluorescence and background</p> |  |  |  |



|                                                                                       |                                                                                    |                                                                                     |                                                                                     |
|---------------------------------------------------------------------------------------|------------------------------------------------------------------------------------|-------------------------------------------------------------------------------------|-------------------------------------------------------------------------------------|
| Un-injected negative controls for autofluorescence<br><br>Fat body                    | 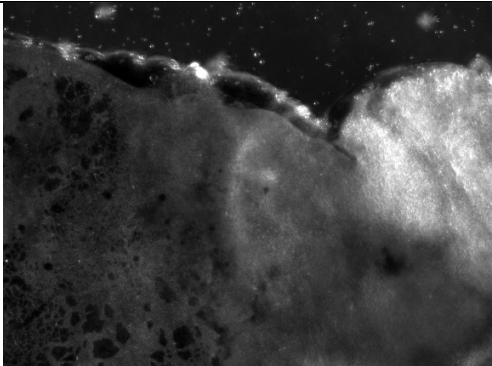 |  |  |
| Un-injected negative controls for autofluorescence<br><br>Ovaries (post bloodfeeding) |  |  |  |

Figure S3 – Adult female *Cx. Papiens* - intrathoracic injection

| Tissue                                   | Bright Field                                                                         | RNAi trigger                                                                          | Merge                                                                                 |
|------------------------------------------|--------------------------------------------------------------------------------------|---------------------------------------------------------------------------------------|---------------------------------------------------------------------------------------|
| Head / signal at injection site / 24 HPE | 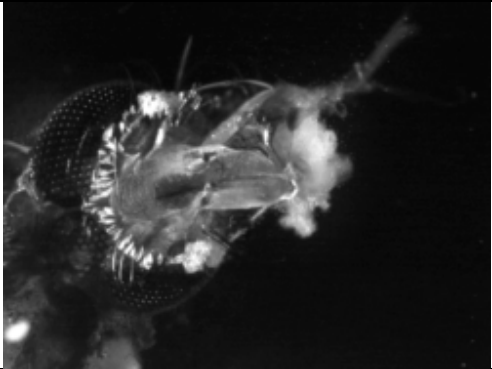 |  |  |

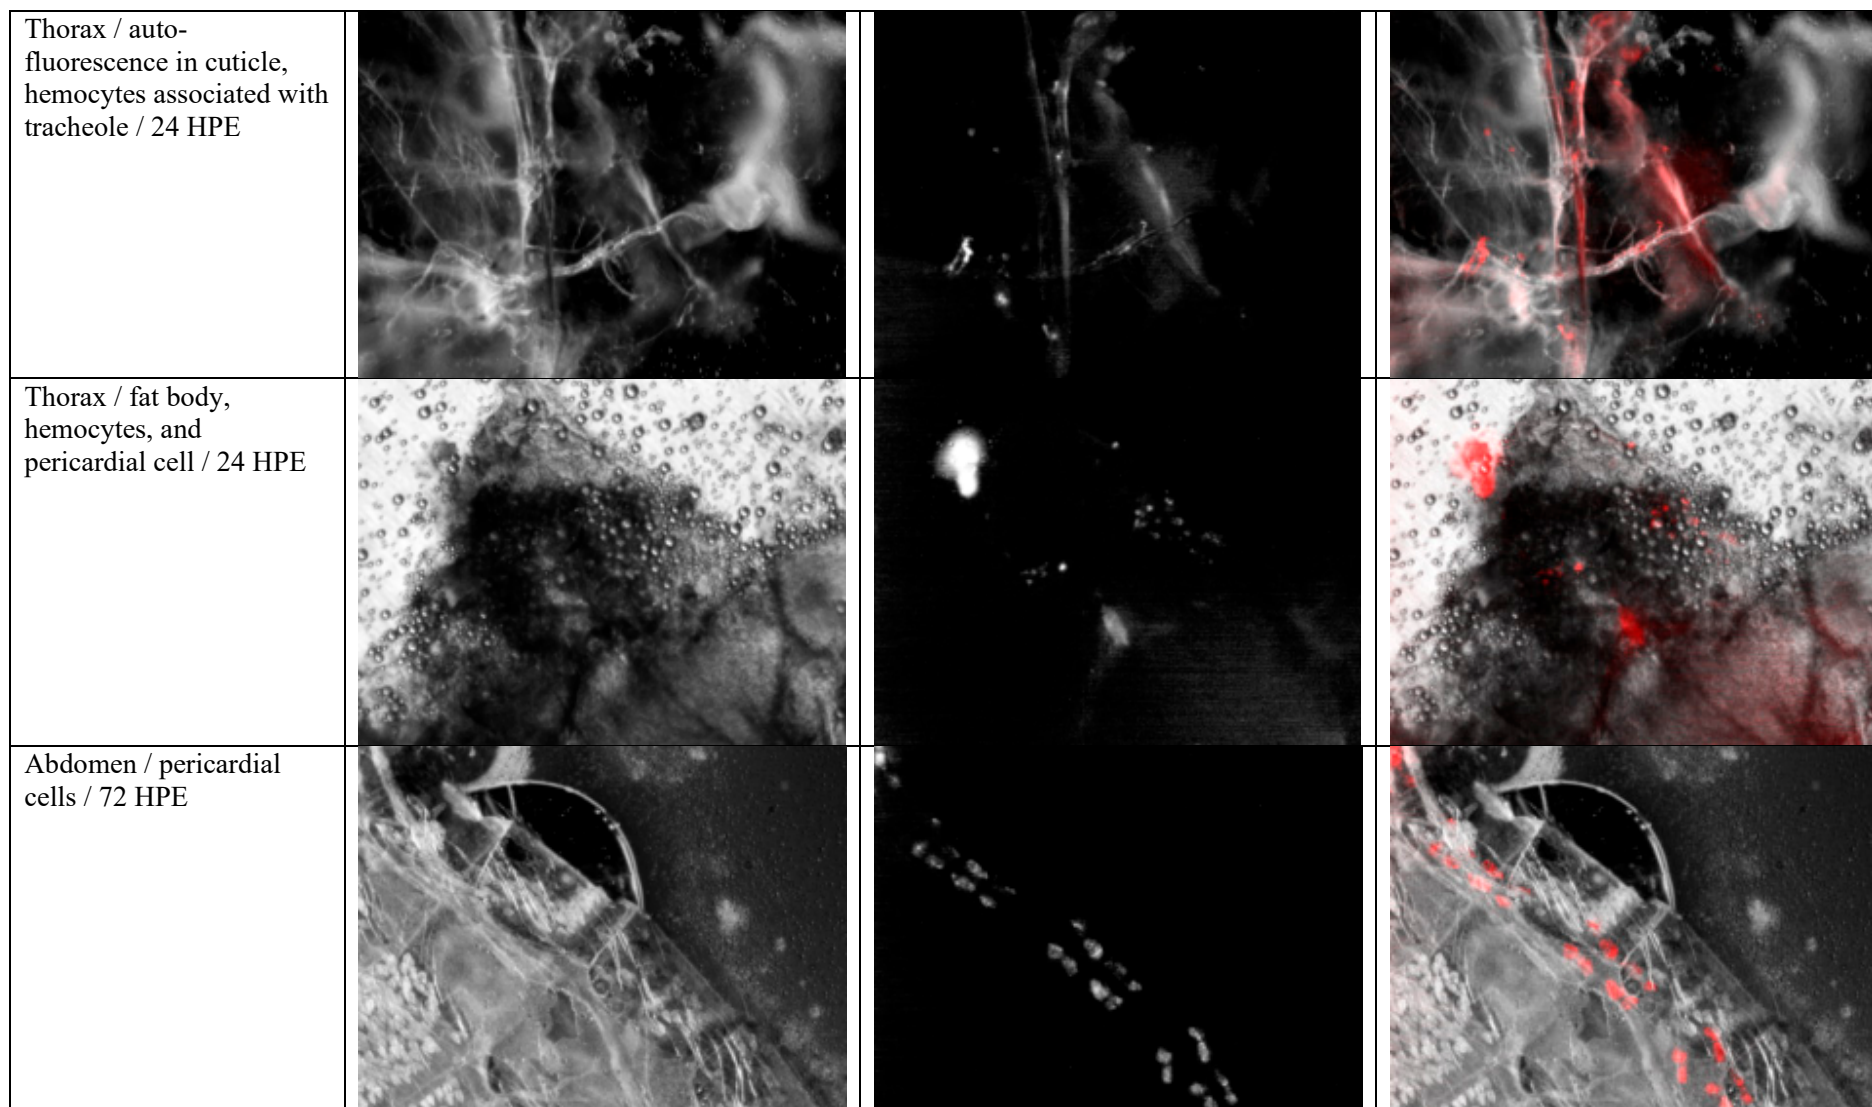

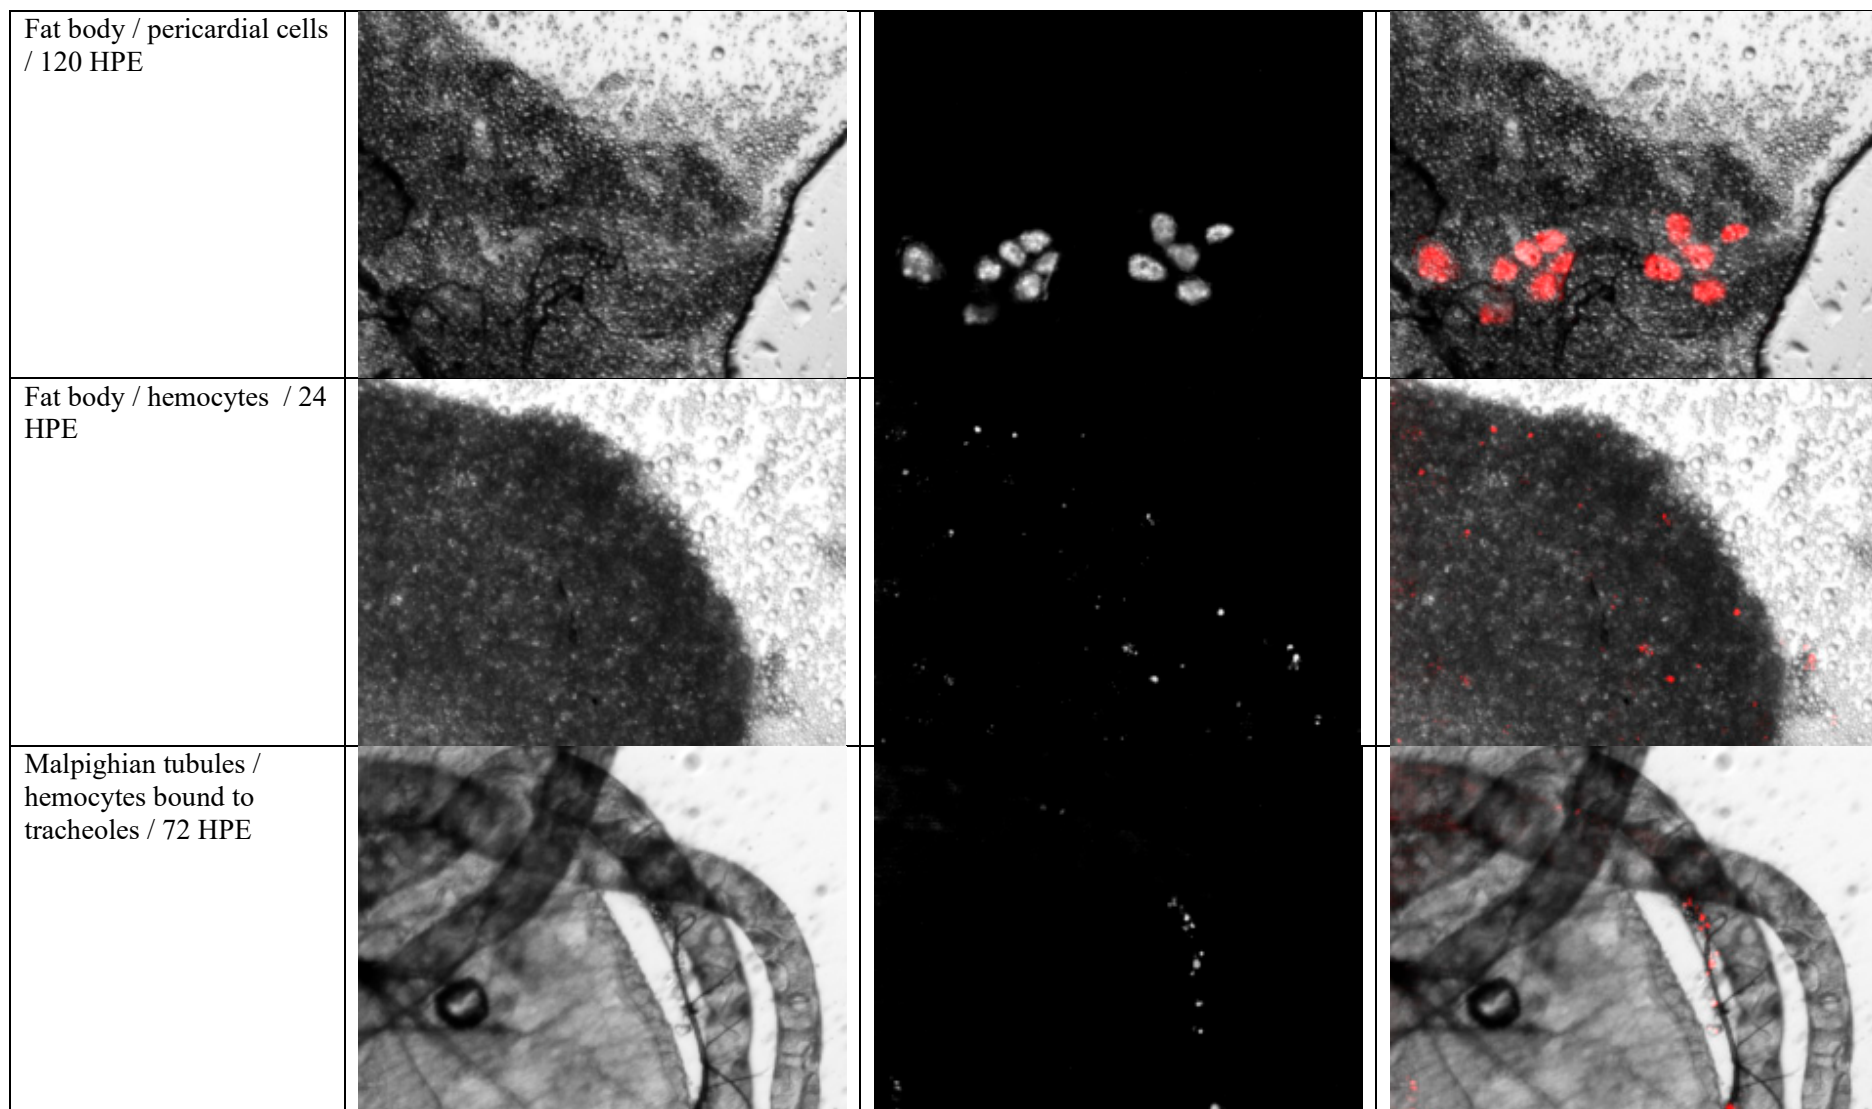



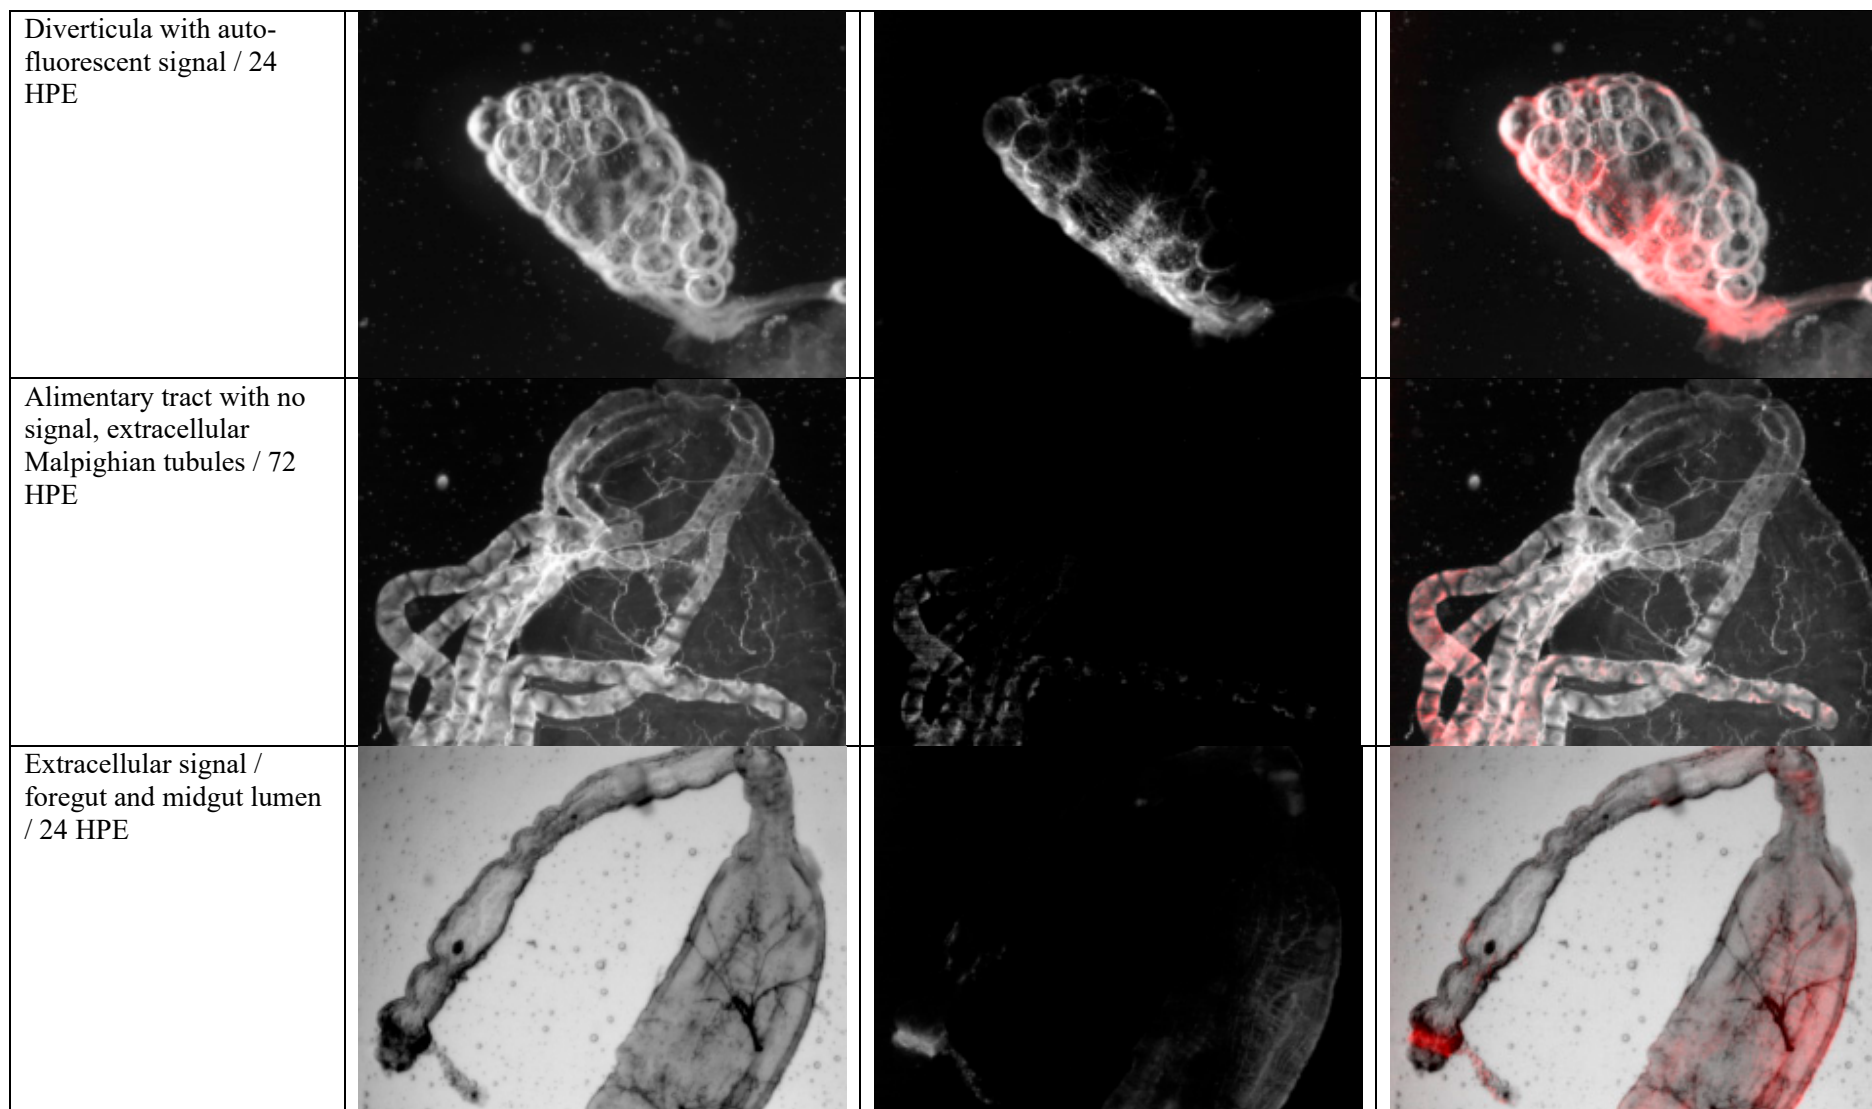



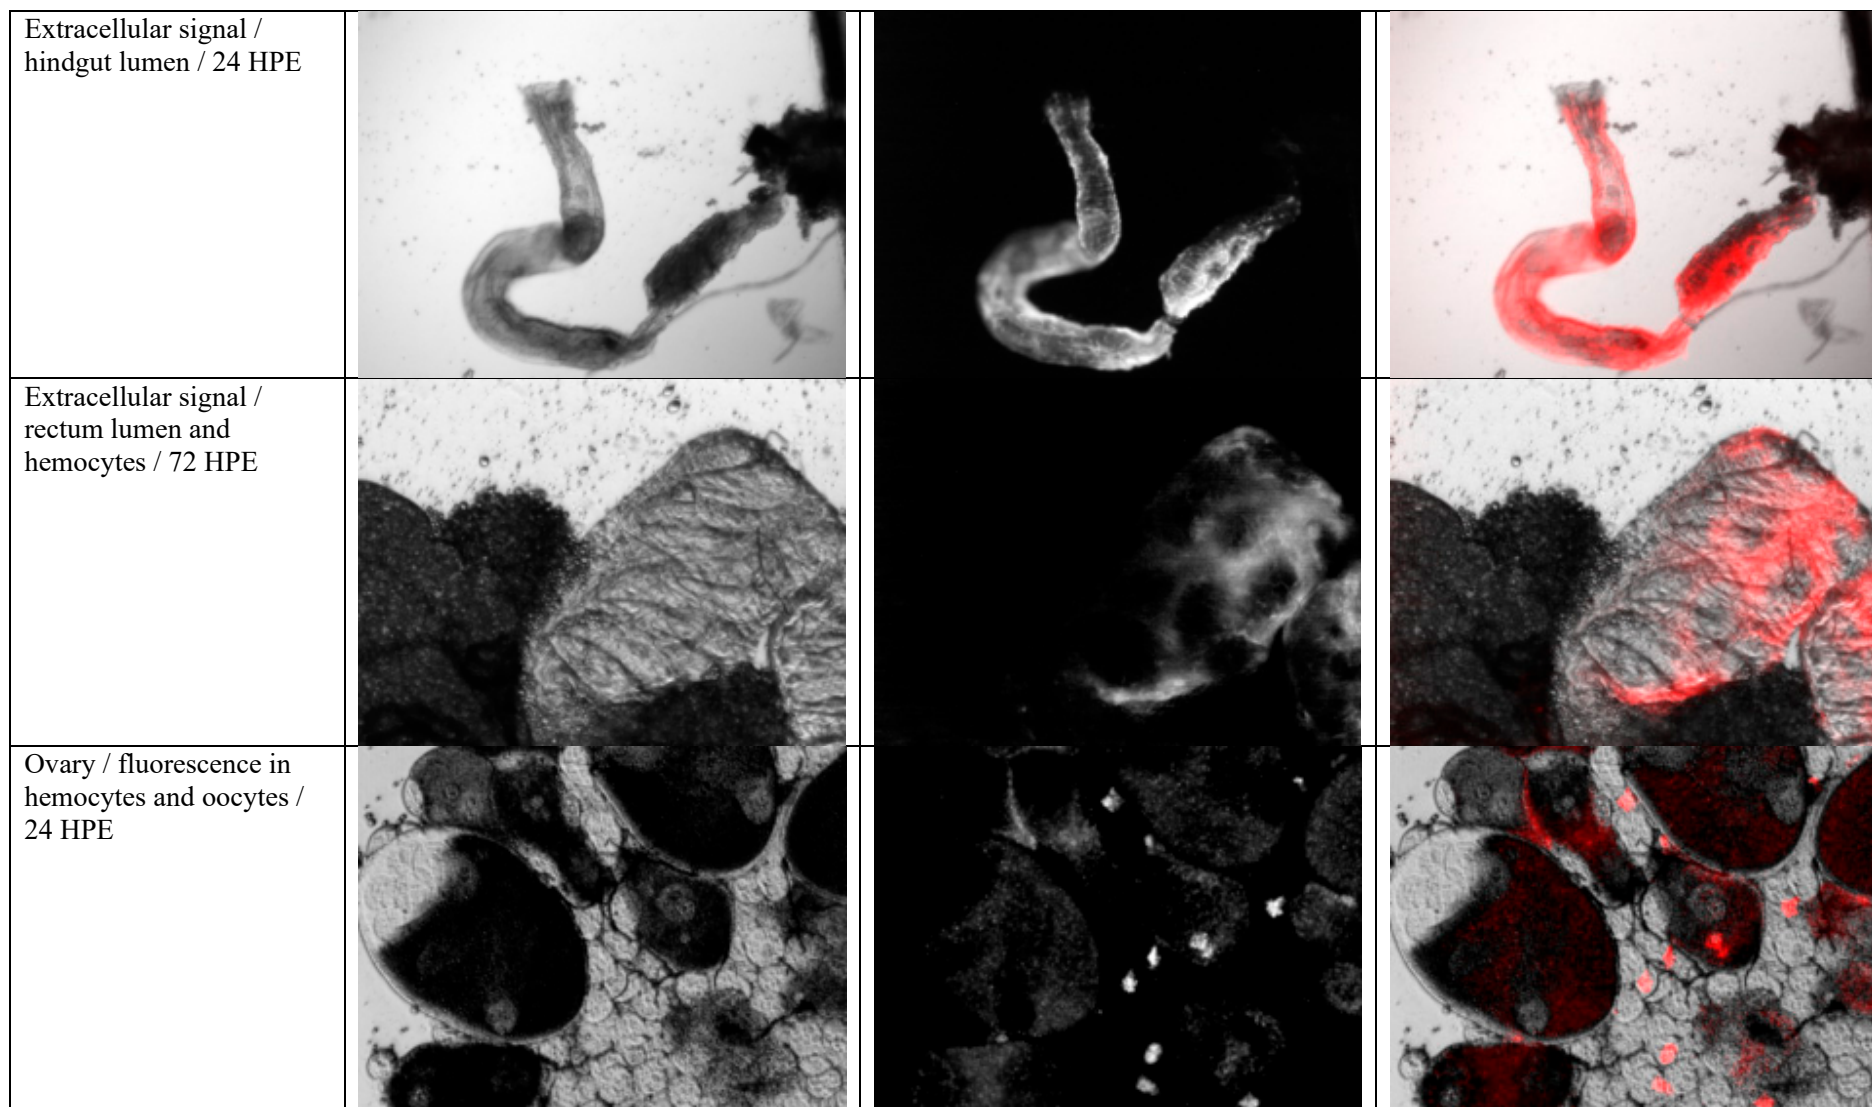

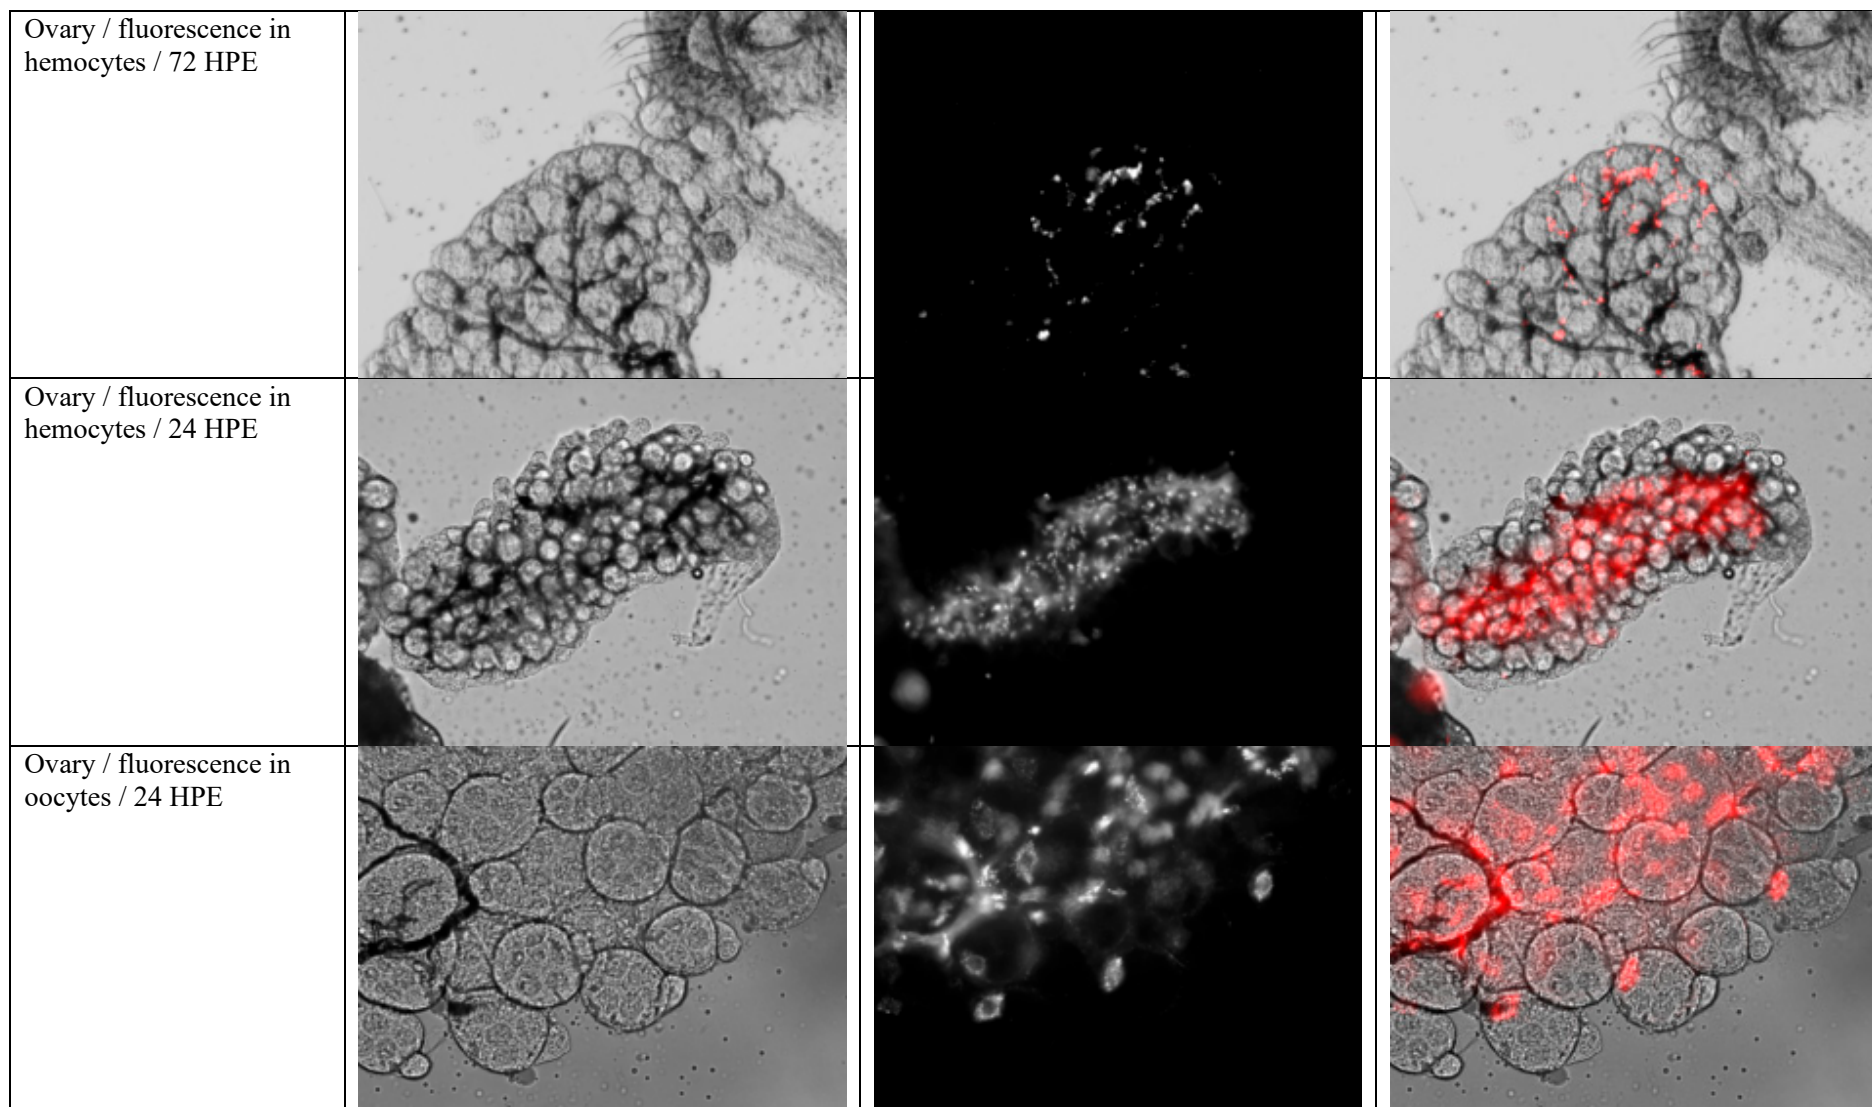

|                                                                                                                             |                                                                                     |                                                                                      |                                                                                      |
|-----------------------------------------------------------------------------------------------------------------------------|-------------------------------------------------------------------------------------|--------------------------------------------------------------------------------------|--------------------------------------------------------------------------------------|
| <p>Un-injected negative controls for autofluorescence</p> <p>Diverticula with autofluorescence noted</p>                    | 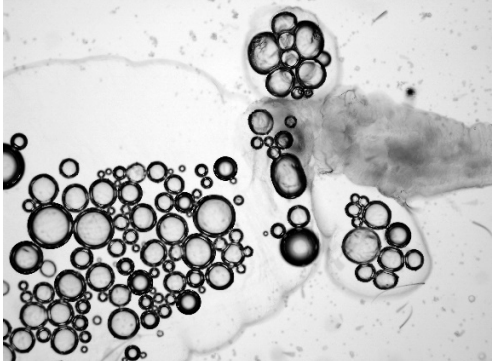  |   |   |
| <p>Un-injected negative controls for autofluorescence</p> <p>Midgut</p>                                                     |   |   |   |
| <p>Un-injected negative controls for autofluorescence</p> <p>Abdomen with autofluorescence from flexible membrane noted</p> |  |  |  |



|                                                                                                                                                                                             |                                                                                     |                                                                                      |                                                                                      |
|---------------------------------------------------------------------------------------------------------------------------------------------------------------------------------------------|-------------------------------------------------------------------------------------|--------------------------------------------------------------------------------------|--------------------------------------------------------------------------------------|
| <p>Un-injected negative controls for autofluorescence</p> <p>Leg with cuticle autofluorescence</p>                                                                                          | 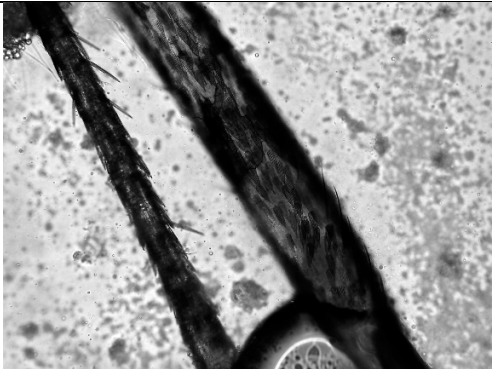  |   |   |
| <p>Un-injected negative controls for autofluorescence</p> <p>Ovaries, Malpighian tubules, and abdominal cuticle with autofluorescence in cuticle (weak with general background showing)</p> |   |   |   |
| <p>Un-injected negative controls for autofluorescence</p> <p>Fat body</p>                                                                                                                   |  |  |  |

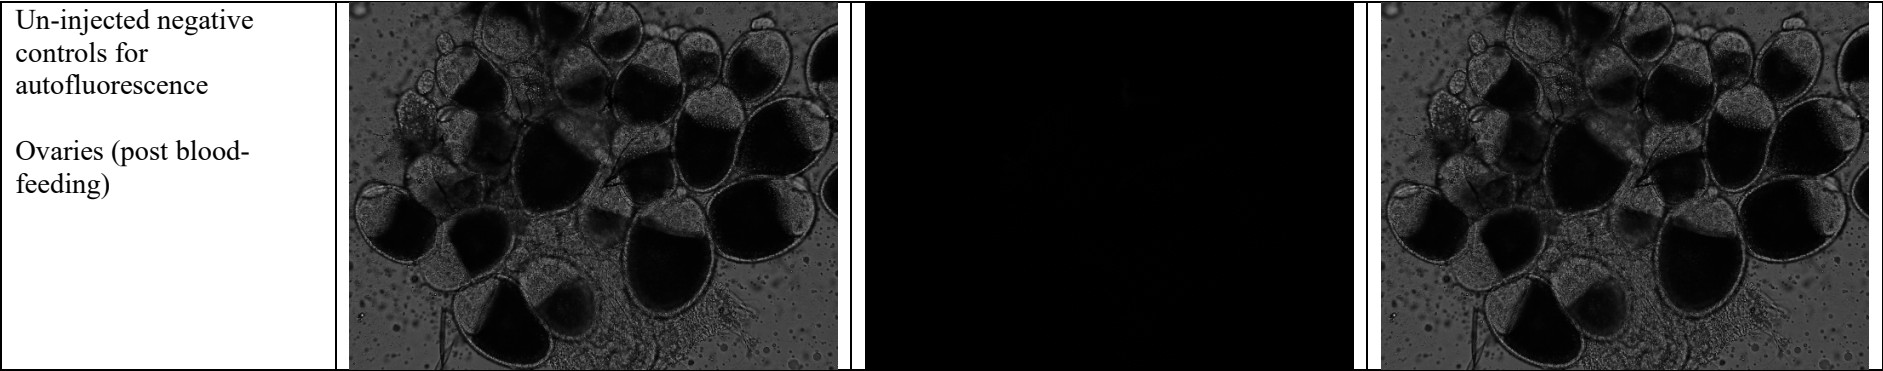

Figure S4 – Adult female *Ae. aegypti* 25-48 hours post blood/meal - intrathoracic injection

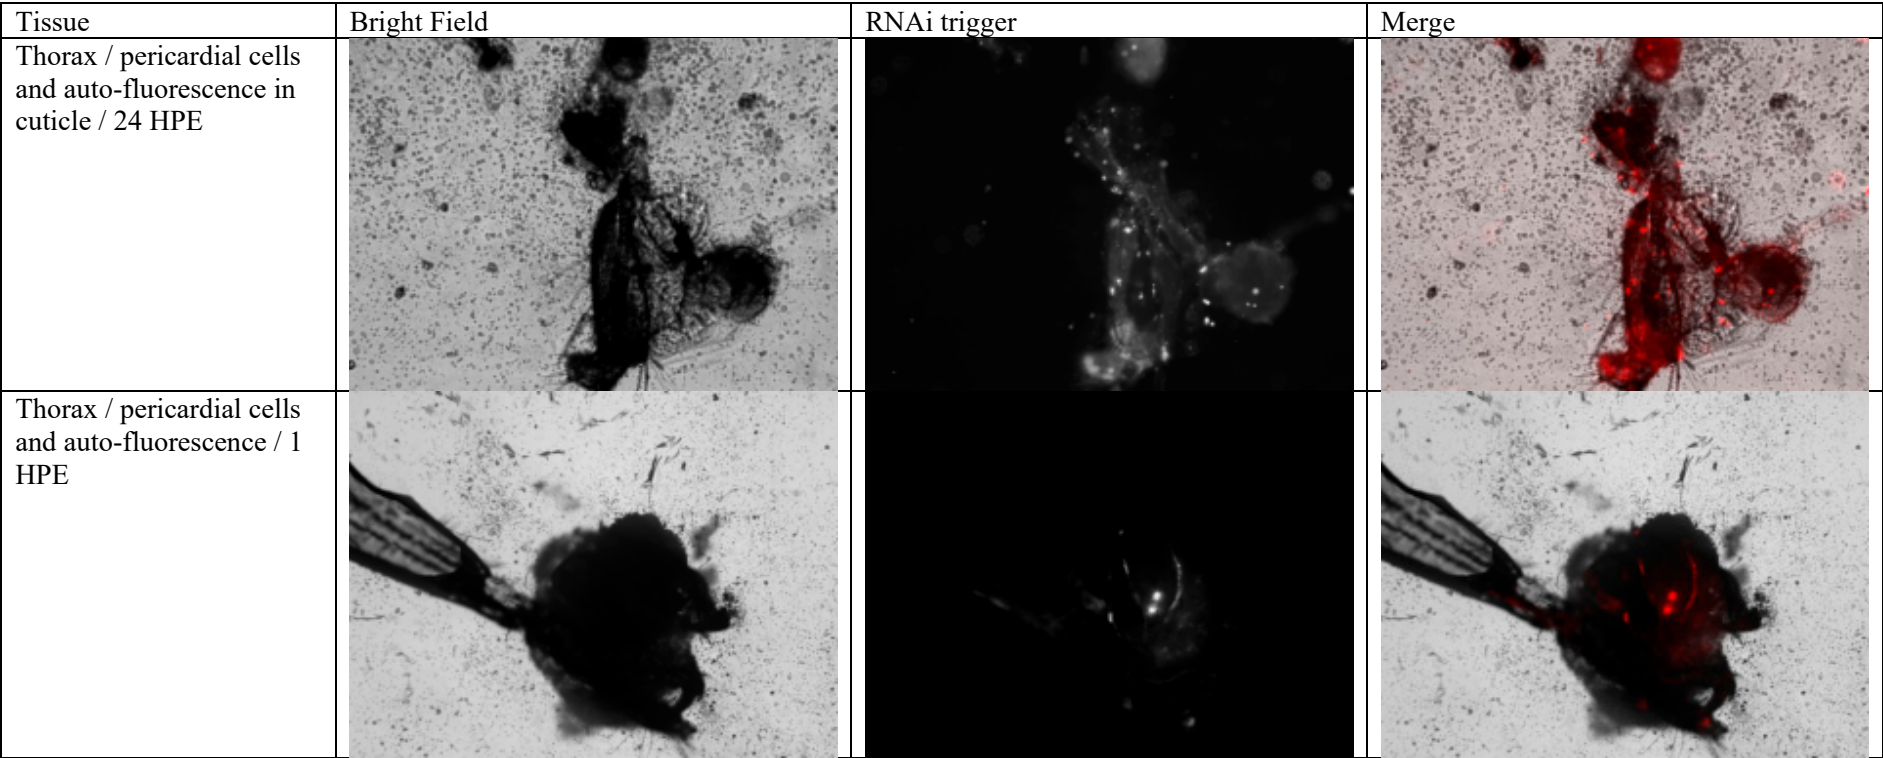



|                                                                   |                                                                                     |                                                                                      |                                                                                      |
|-------------------------------------------------------------------|-------------------------------------------------------------------------------------|--------------------------------------------------------------------------------------|--------------------------------------------------------------------------------------|
| Abdomen / pericardial cells / 1 HPE                               | 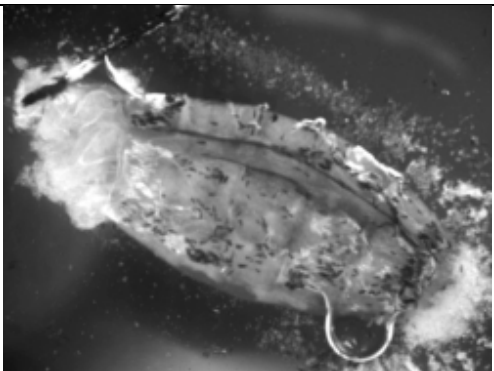  |   |   |
| Abdomen / pericardial cells / 24 HPE                              |   |   |   |
| Fat body / hemocytes and ovarian follicles (bottom right) / 1 HPE |  |  |  |

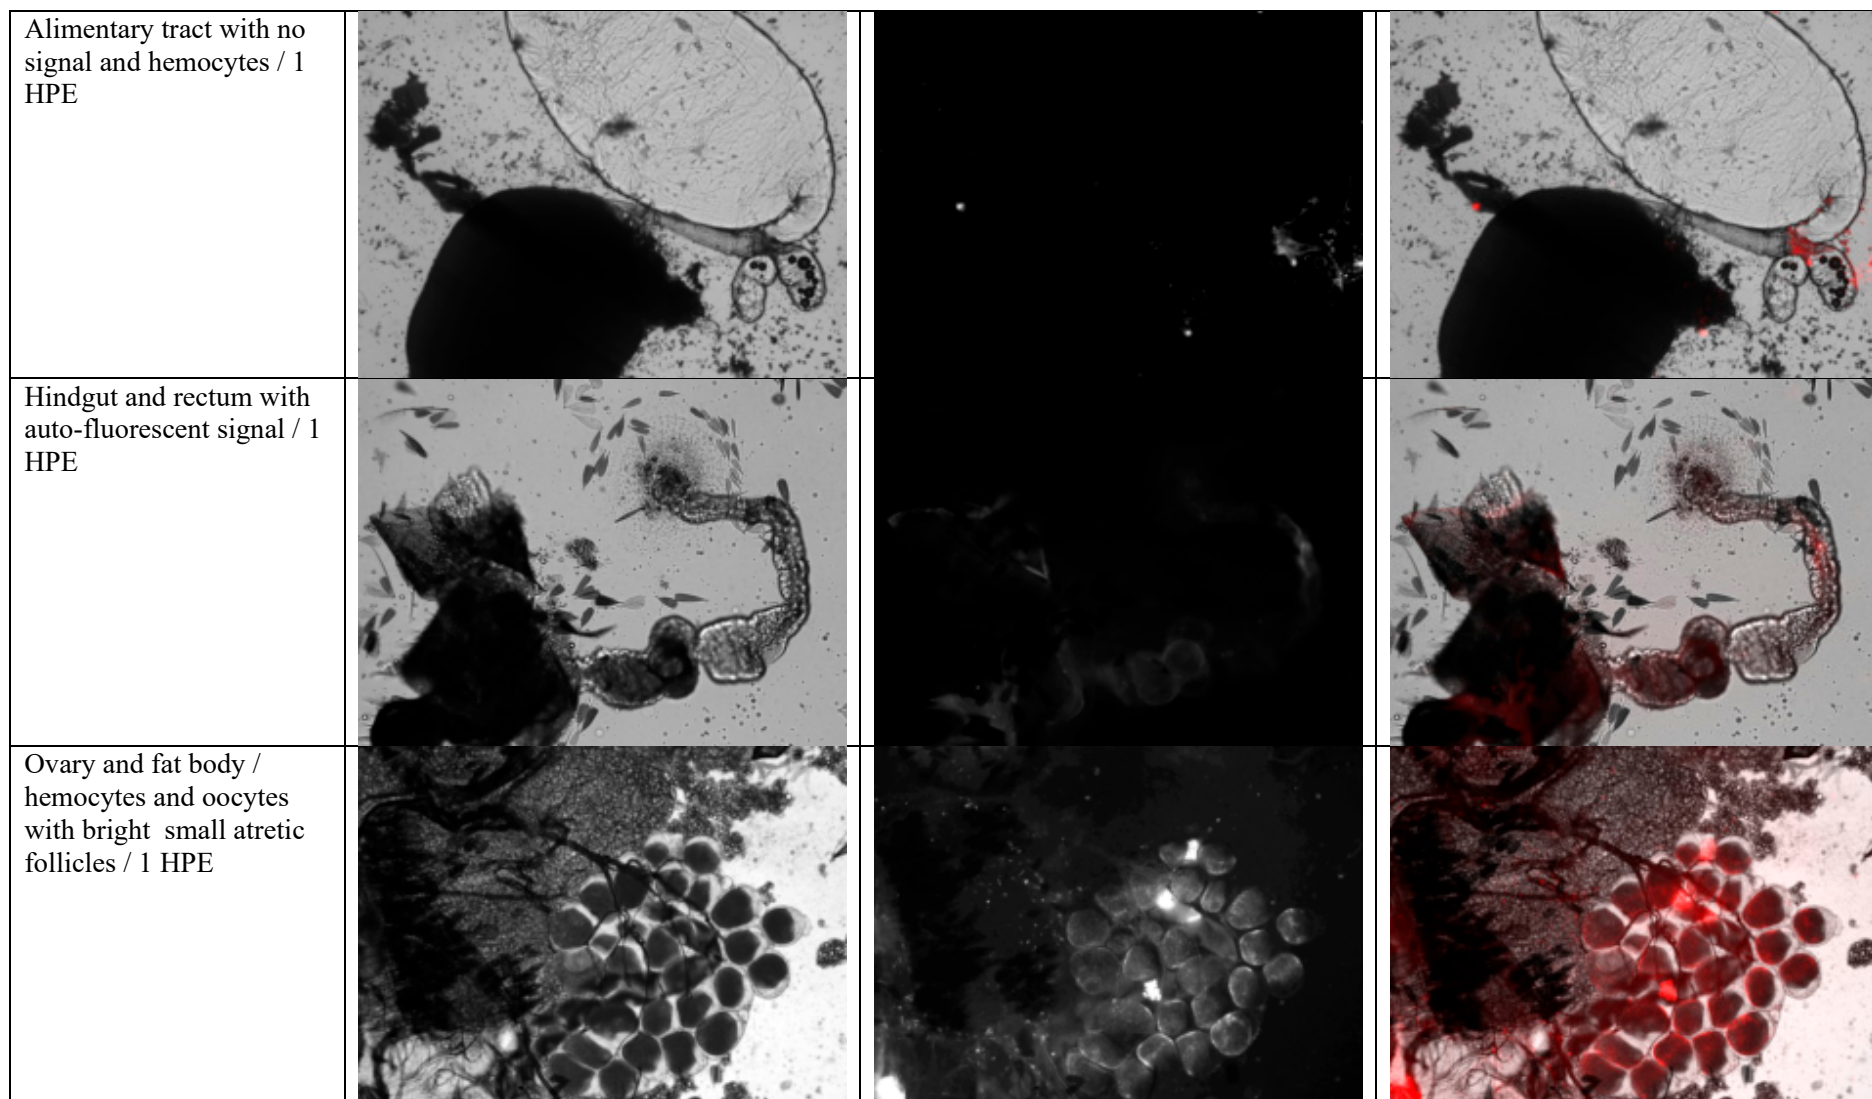

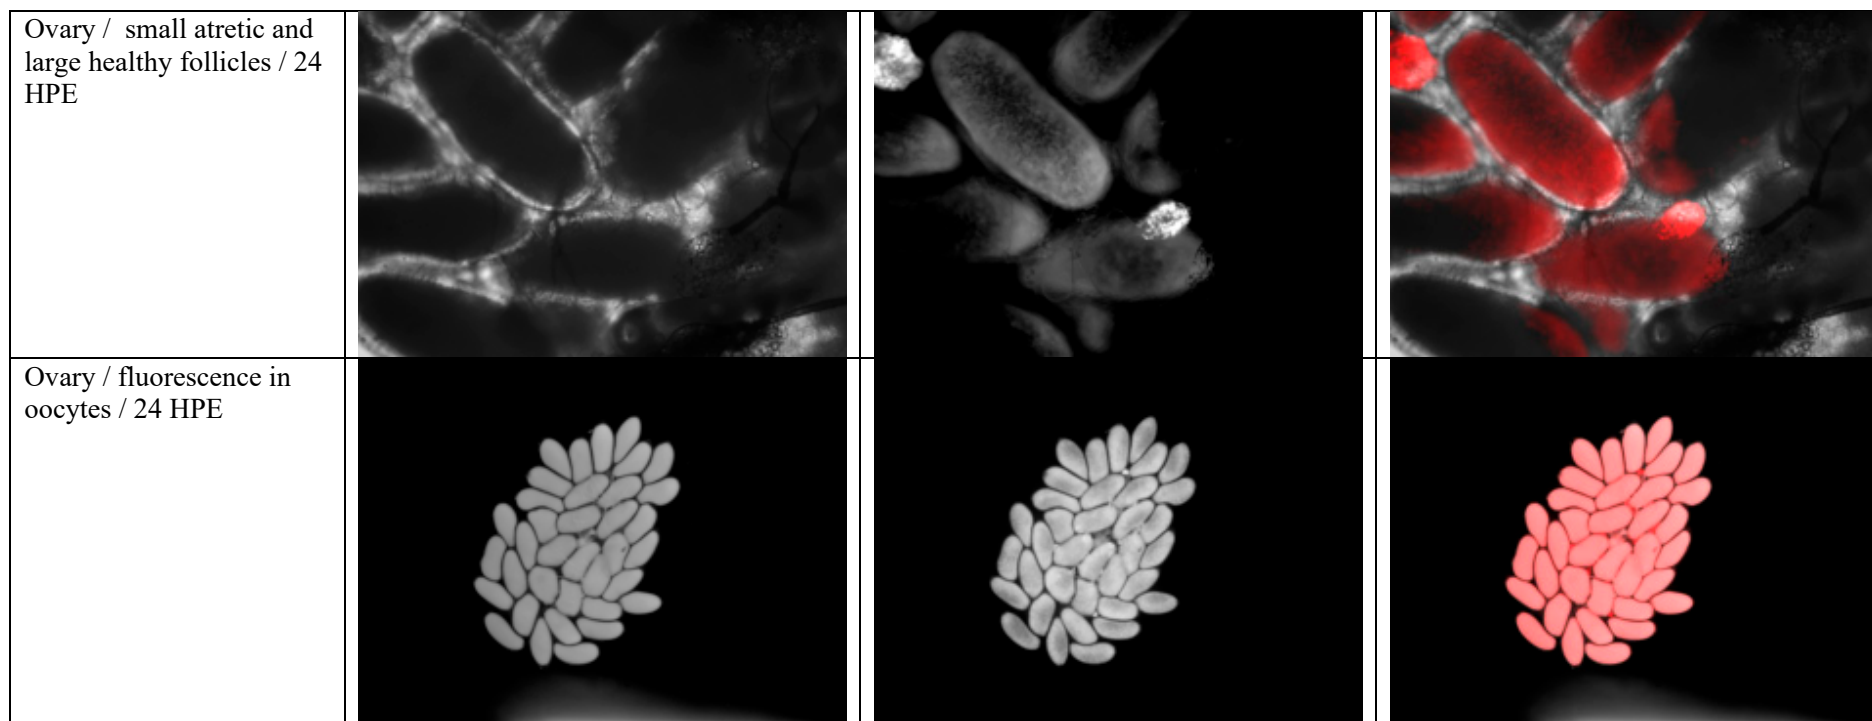



Figure S5 – Adult female *An. gambiae* 25-48 hours post blood/meal - intrathoracic injection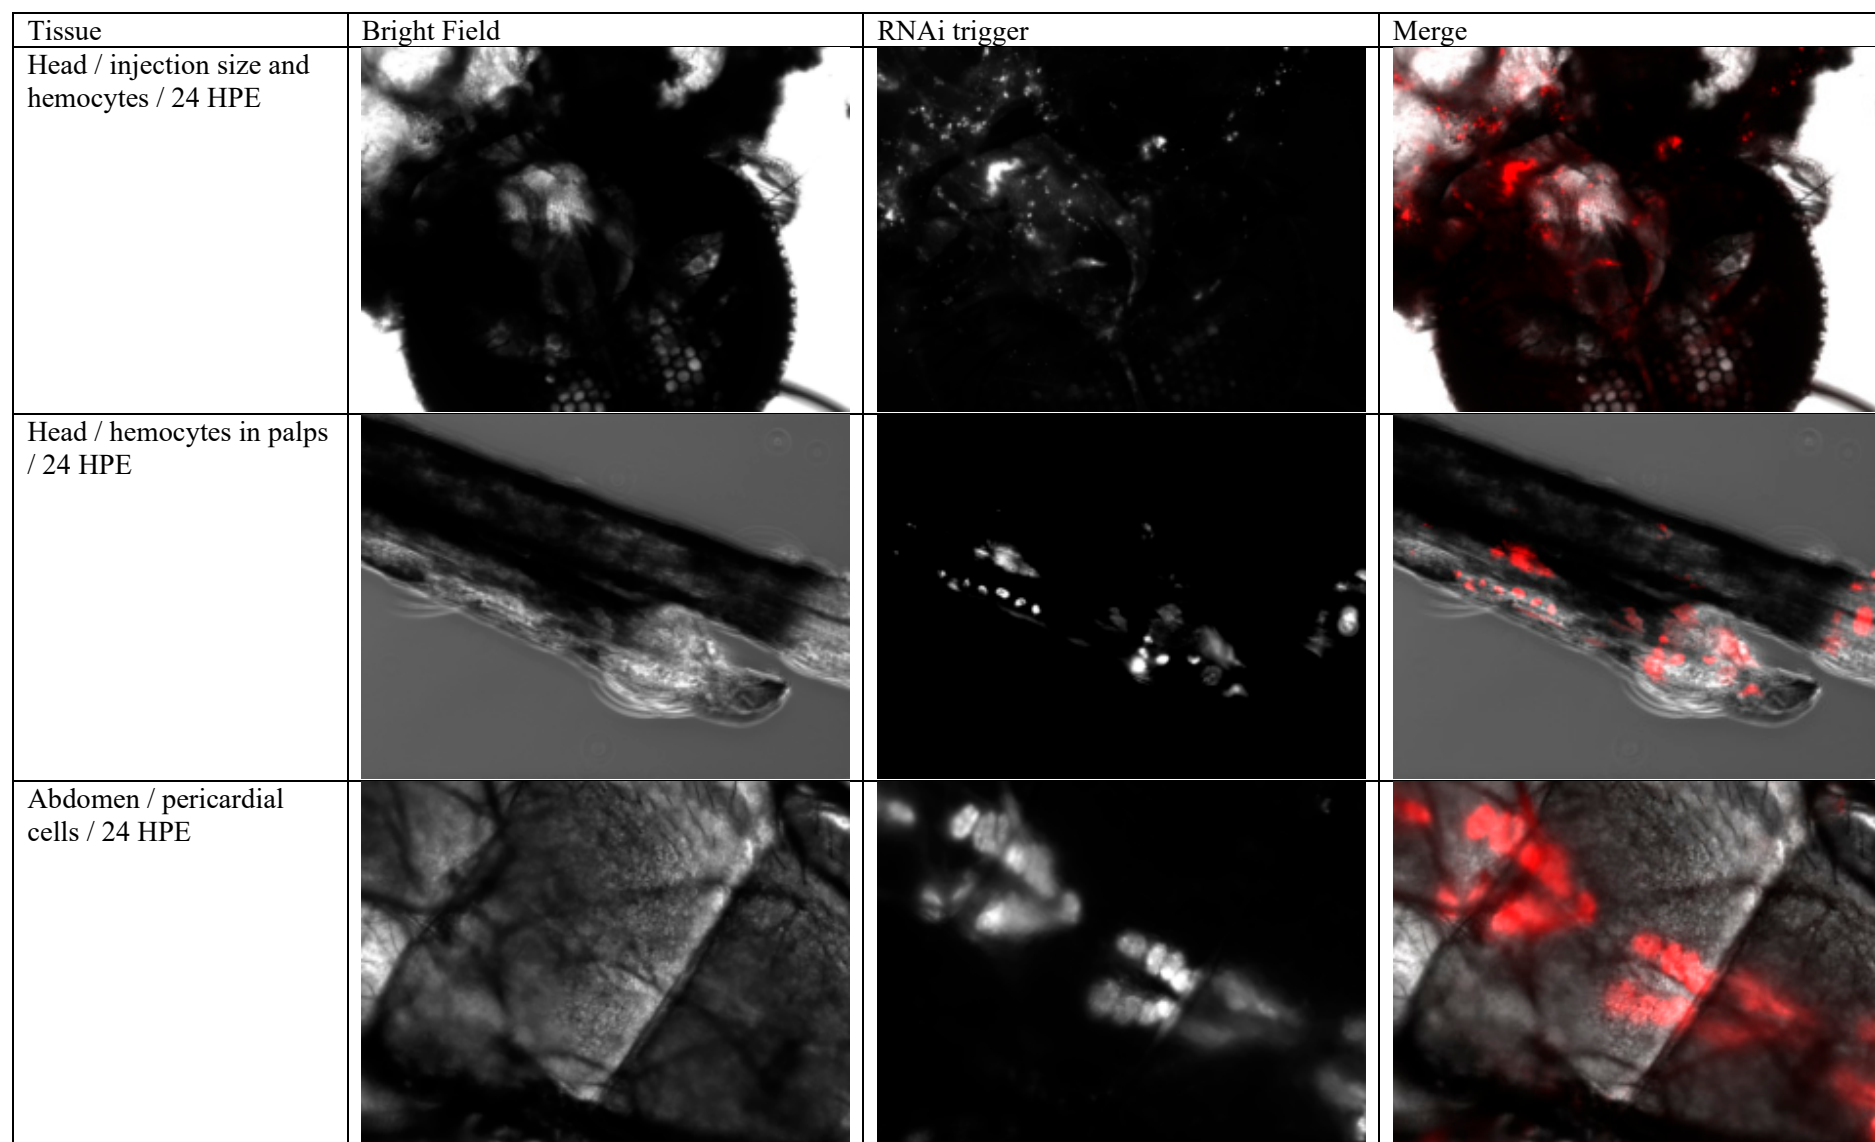

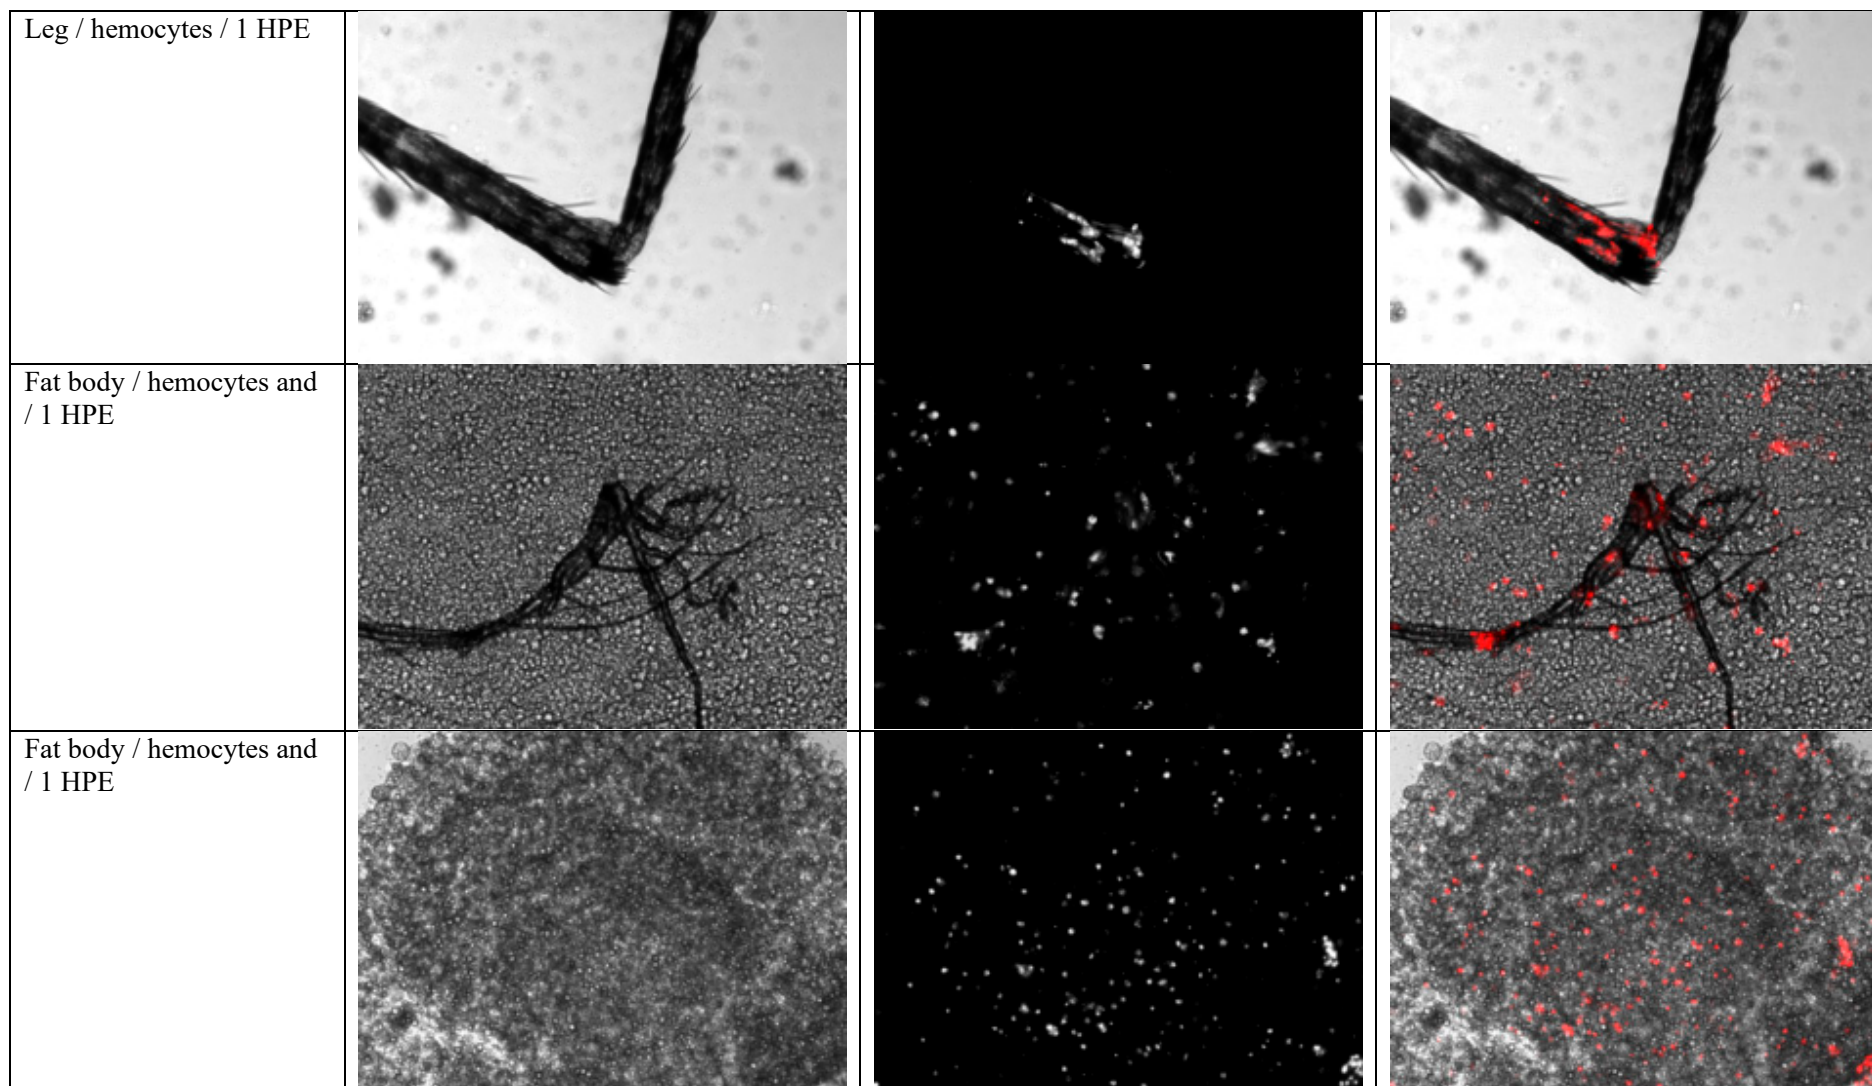

|                                                          |                                                                                     |                                                                                      |                                                                                      |
|----------------------------------------------------------|-------------------------------------------------------------------------------------|--------------------------------------------------------------------------------------|--------------------------------------------------------------------------------------|
| Malpighian tubules /lack of hemocytes / 1 HPE            | 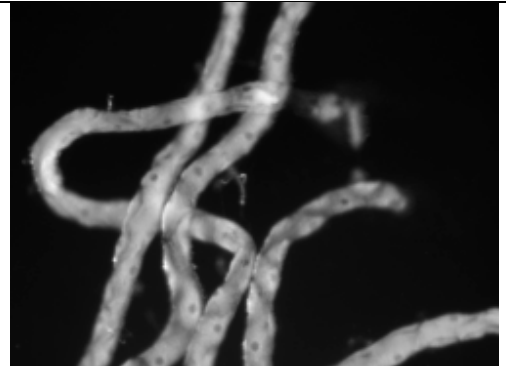  |   |   |
| Alimentary tract with no signal and hemocytes / 1 HPE    |   |   |   |
| Midgut with no signal and coagulated blood/meal / 24 HPE |  |  |  |



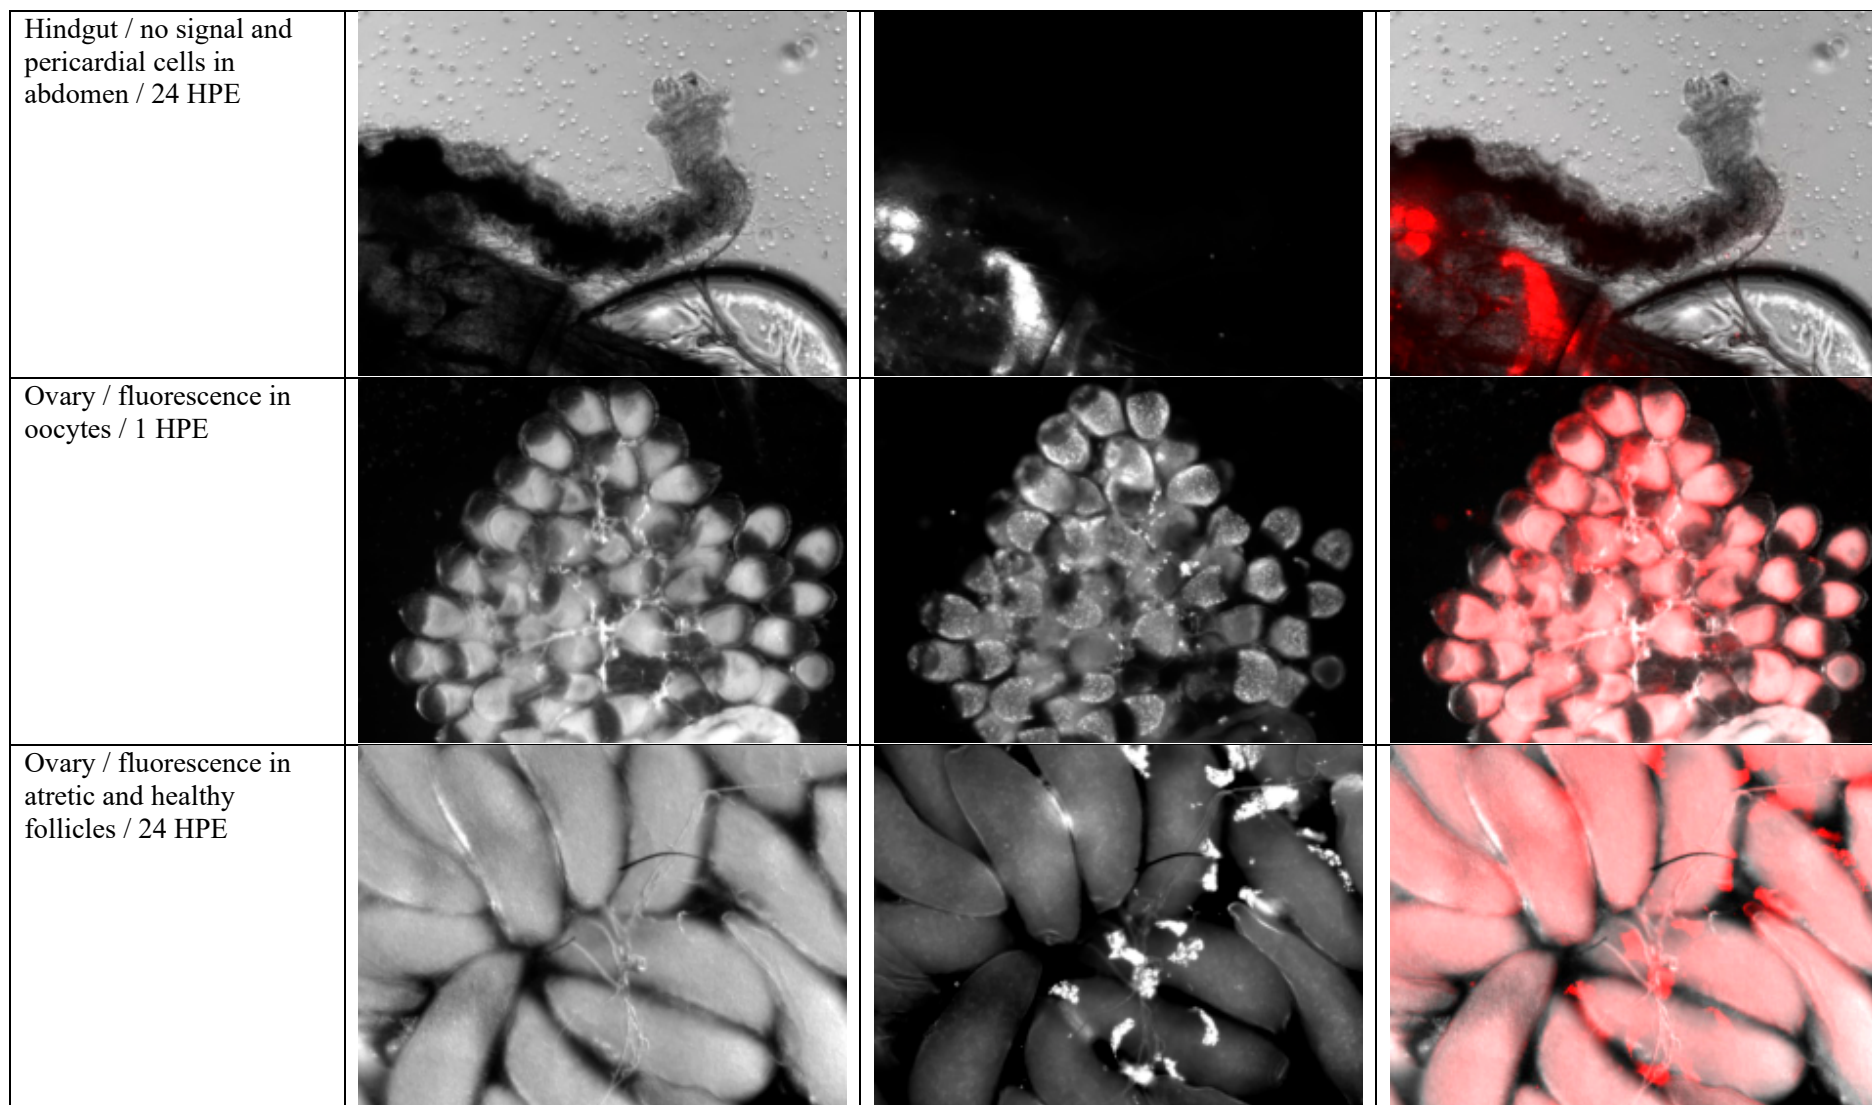



Figure S6 – Adult female *Cx. pipiens* 25-48 hours post blood/meal - intrathoracic injection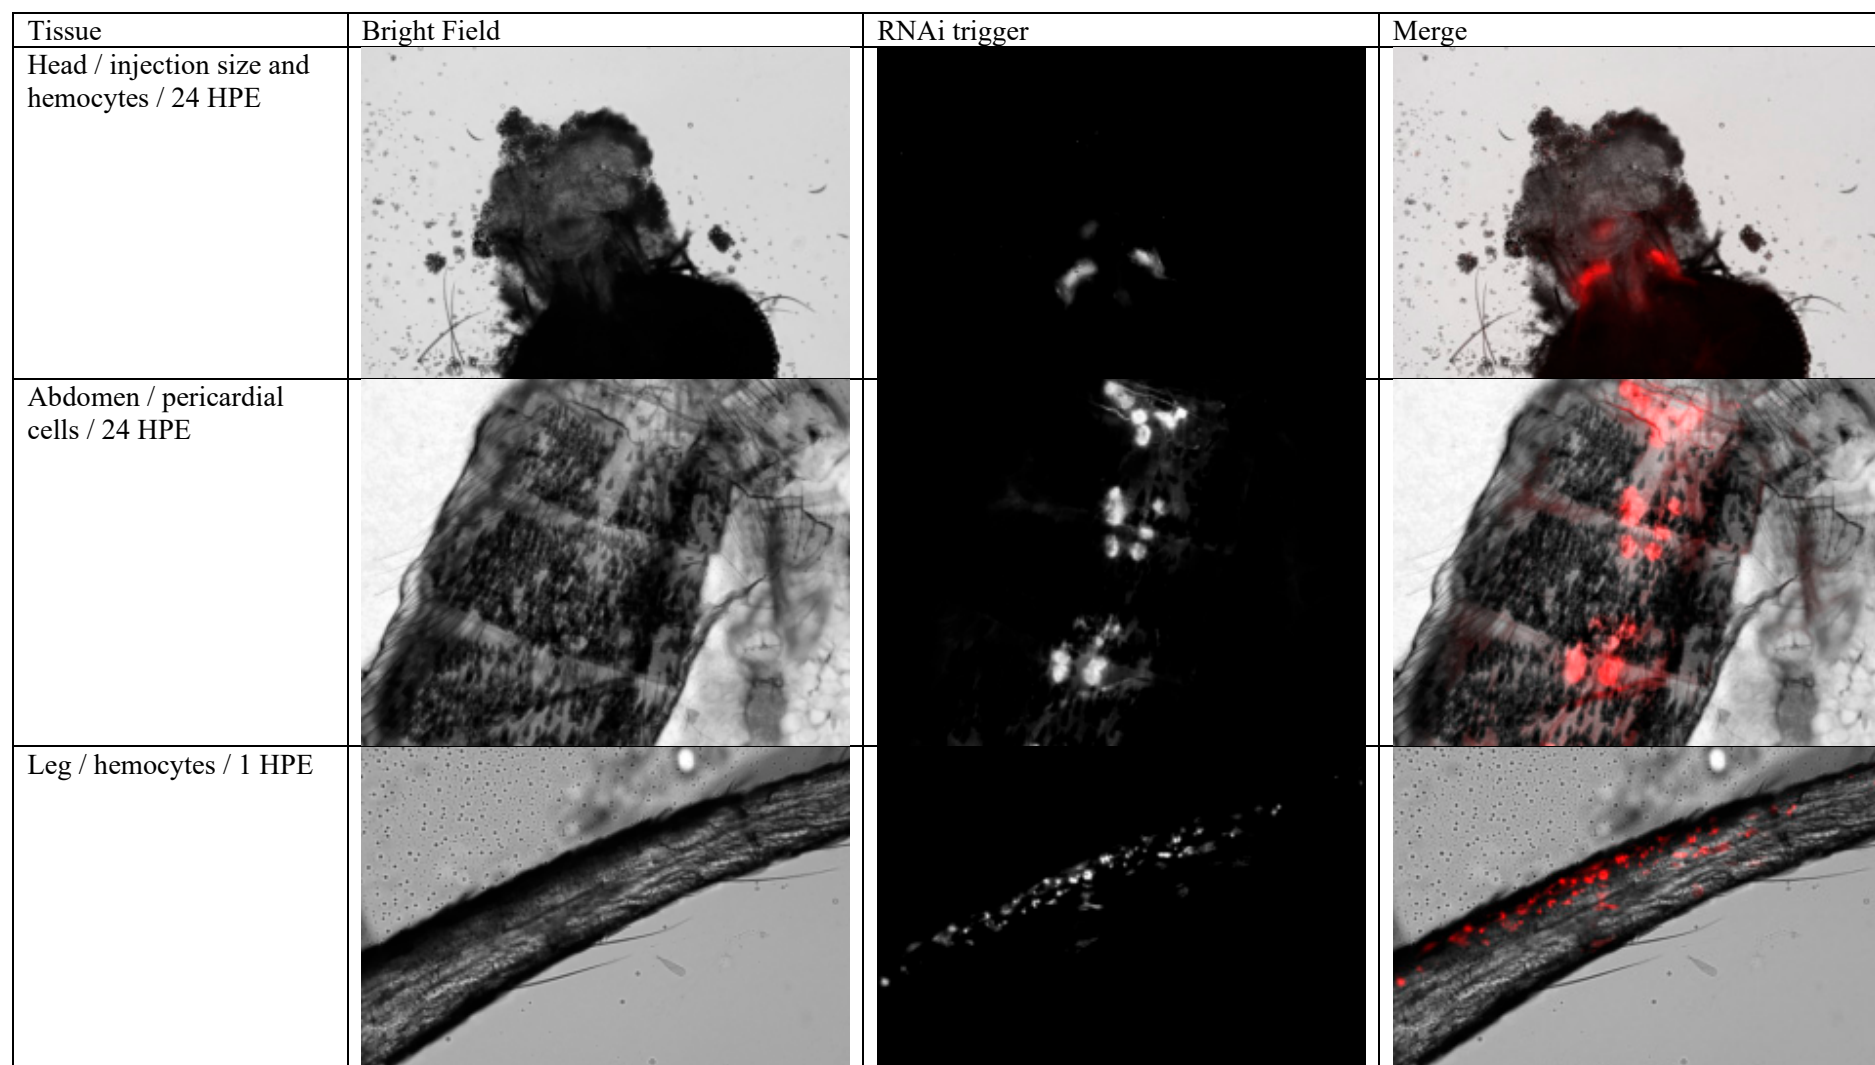

|                                                          |                                                                                                                                                                                                                                                                                     |                                                                                                                                                                                                                                                              |                                                                                                                                                                                                                                                               |
|----------------------------------------------------------|-------------------------------------------------------------------------------------------------------------------------------------------------------------------------------------------------------------------------------------------------------------------------------------|--------------------------------------------------------------------------------------------------------------------------------------------------------------------------------------------------------------------------------------------------------------|---------------------------------------------------------------------------------------------------------------------------------------------------------------------------------------------------------------------------------------------------------------|
| Fat body /fat body and hemocytes / 24 HPE                | 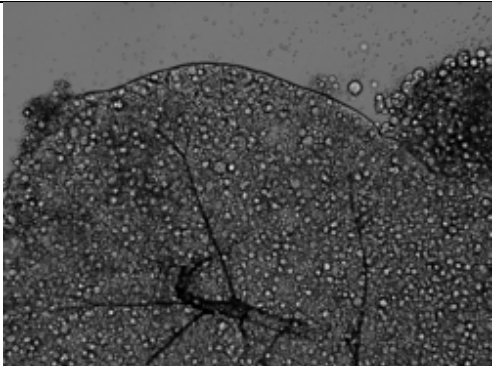 A brightfield micrograph showing a large, irregularly shaped fat body with a granular texture. Several dark, branching structures, likely hemocytes, are visible within and around the fat body. |  A fluorescence micrograph of the same field of view as the first image. The background is dark, and the fat body and hemocytes appear as bright, irregular white shapes. |  A merged fluorescence micrograph of the same field of view. The fat body and hemocytes are outlined in red, while the internal granular structure is shown in grayscale.  |
| Fat body /fat body / 24 HPE                              |  A brightfield micrograph showing a large, irregularly shaped fat body with a granular texture. The fat body is surrounded by a clear space.                                                      |  A fluorescence micrograph of the same field of view as the second image. The fat body appears as a bright, irregular white shape against a dark background.              |  A merged fluorescence micrograph of the same field of view. The fat body is outlined in red, while the internal granular structure is shown in grayscale.                 |
| Fat body / hemocytes associated with tracheoles / 24 HPE |  A brightfield micrograph showing a fat body and hemocytes associated with tracheoles. The fat body is granular, and the tracheoles are visible as dark, branching structures.                   |  A fluorescence micrograph of the same field of view as the third image. The fat body and hemocytes appear as bright, irregular white shapes.                            |  A merged fluorescence micrograph of the same field of view. The fat body and hemocytes are outlined in red, while the internal granular structure is shown in grayscale. |

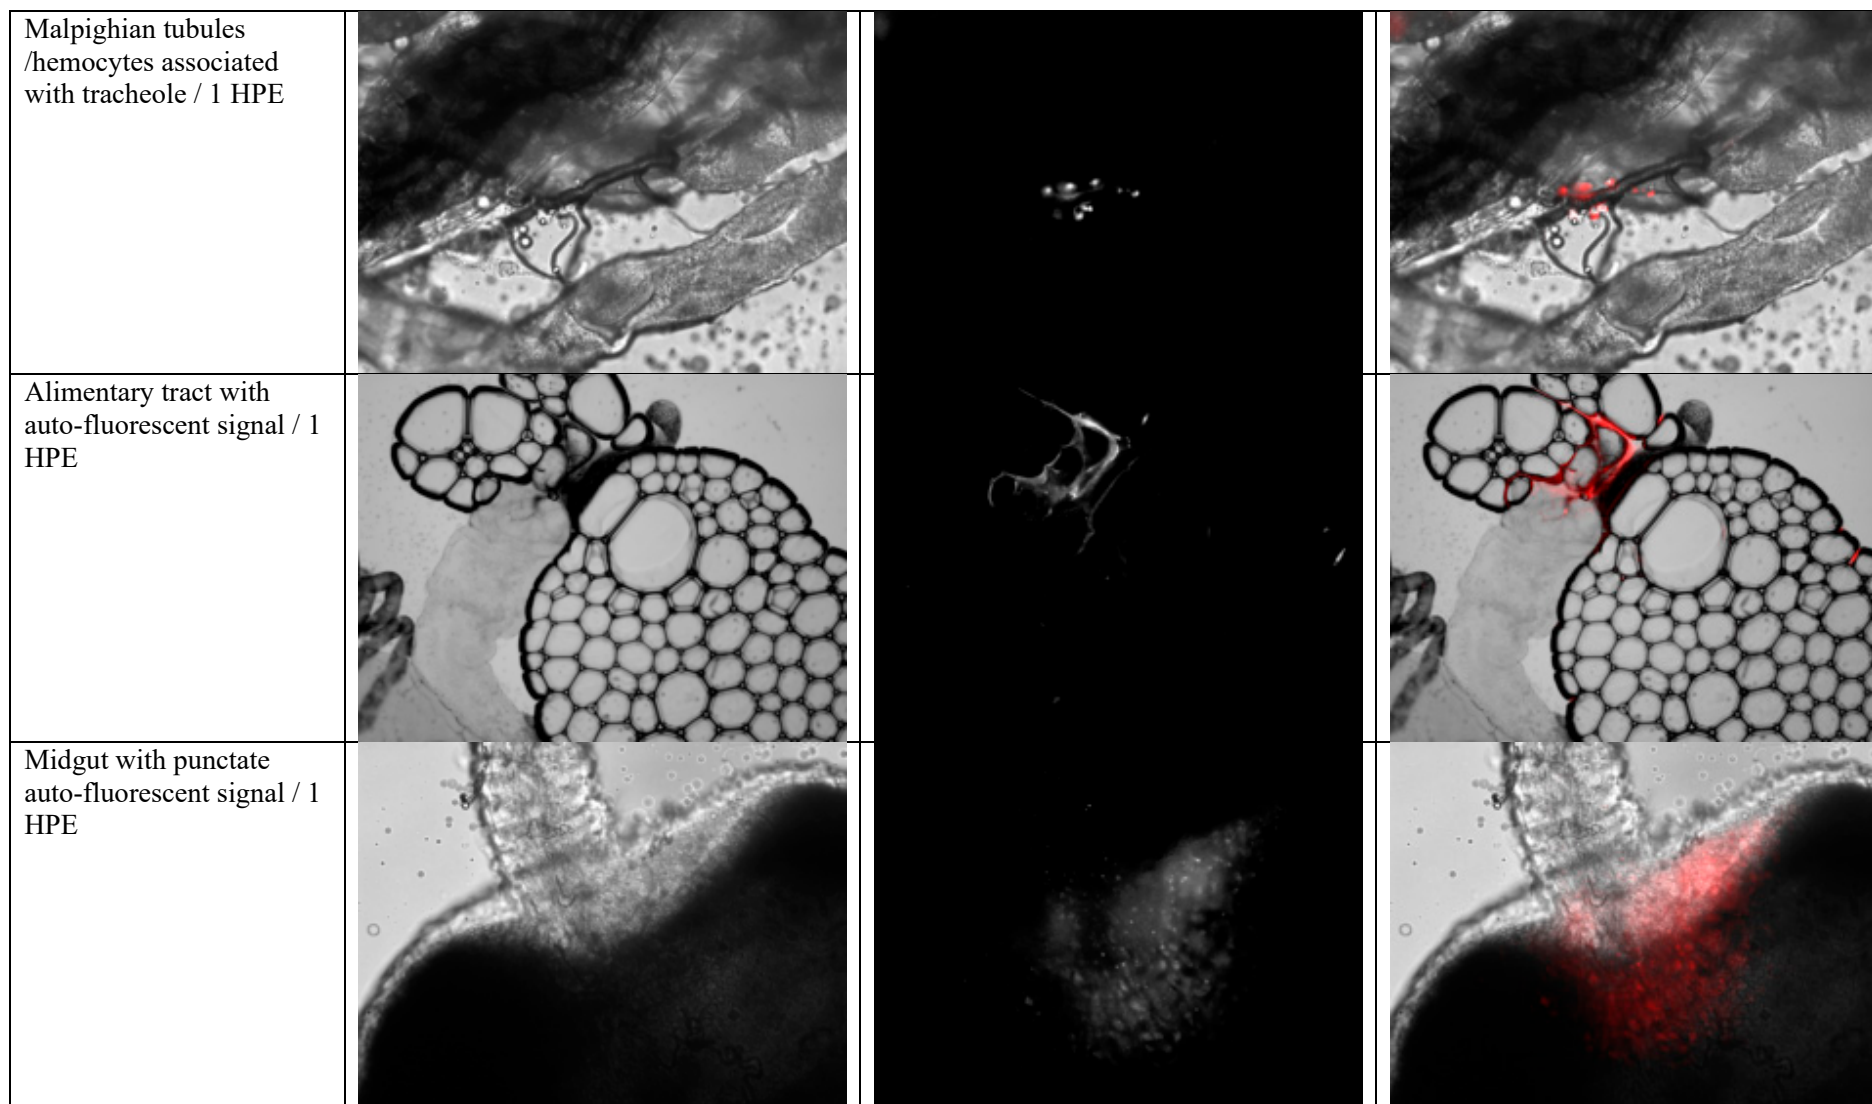



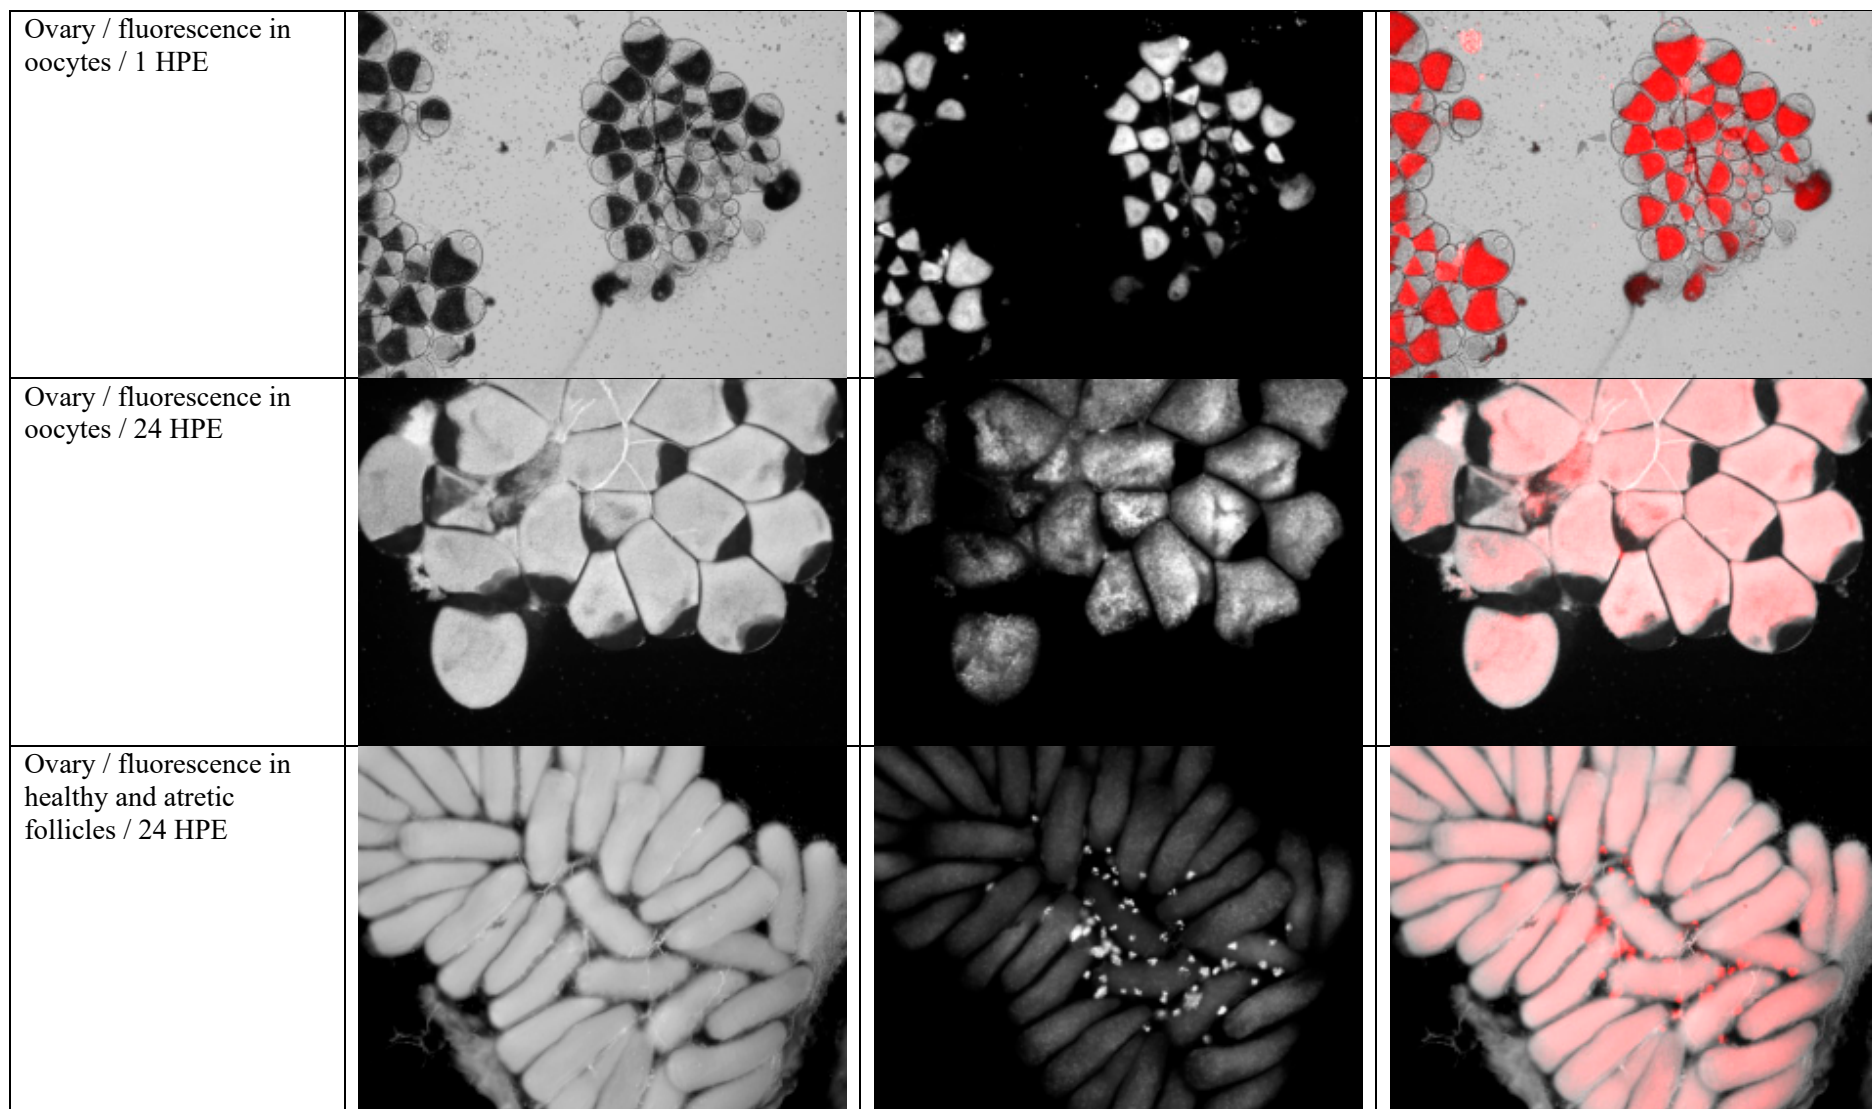



Figure S7 – 4<sup>th</sup> instar *Ae. Aegypti* - intrathoracic injection

| Tissue                                                             | Bright Field                                                                         | RNAi trigger                                                                          | Merge                                                                                 |
|--------------------------------------------------------------------|--------------------------------------------------------------------------------------|---------------------------------------------------------------------------------------|---------------------------------------------------------------------------------------|
| Head / 24 HPE                                                      | 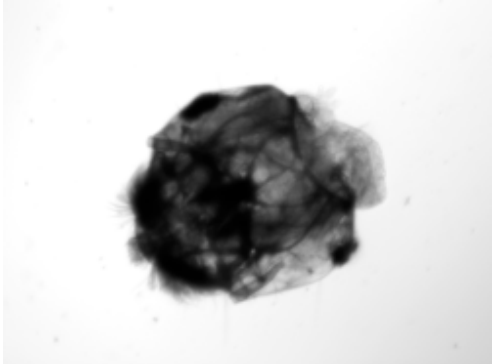   |    |    |
| Abdomen / pericardial cells / 24 HPE                               |   |   |   |
| Abdomen / terminal segment / auto-fluorescence in cuticle / 24 HPE |  |  |  |

|                                                              |                                                                                     |                                                                                      |                                                                                      |
|--------------------------------------------------------------|-------------------------------------------------------------------------------------|--------------------------------------------------------------------------------------|--------------------------------------------------------------------------------------|
| Abdomen / Terminal segment /respiratory siphon               | 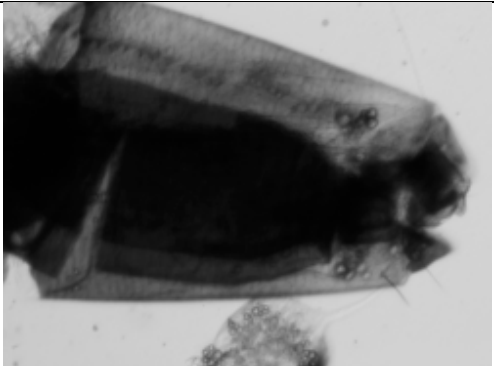  |   |   |
| Caecum / 24 HPE                                              |   |   |   |
| Alimentary tract (midgut) with extracellular signal / 24 HPE |  |  |  |

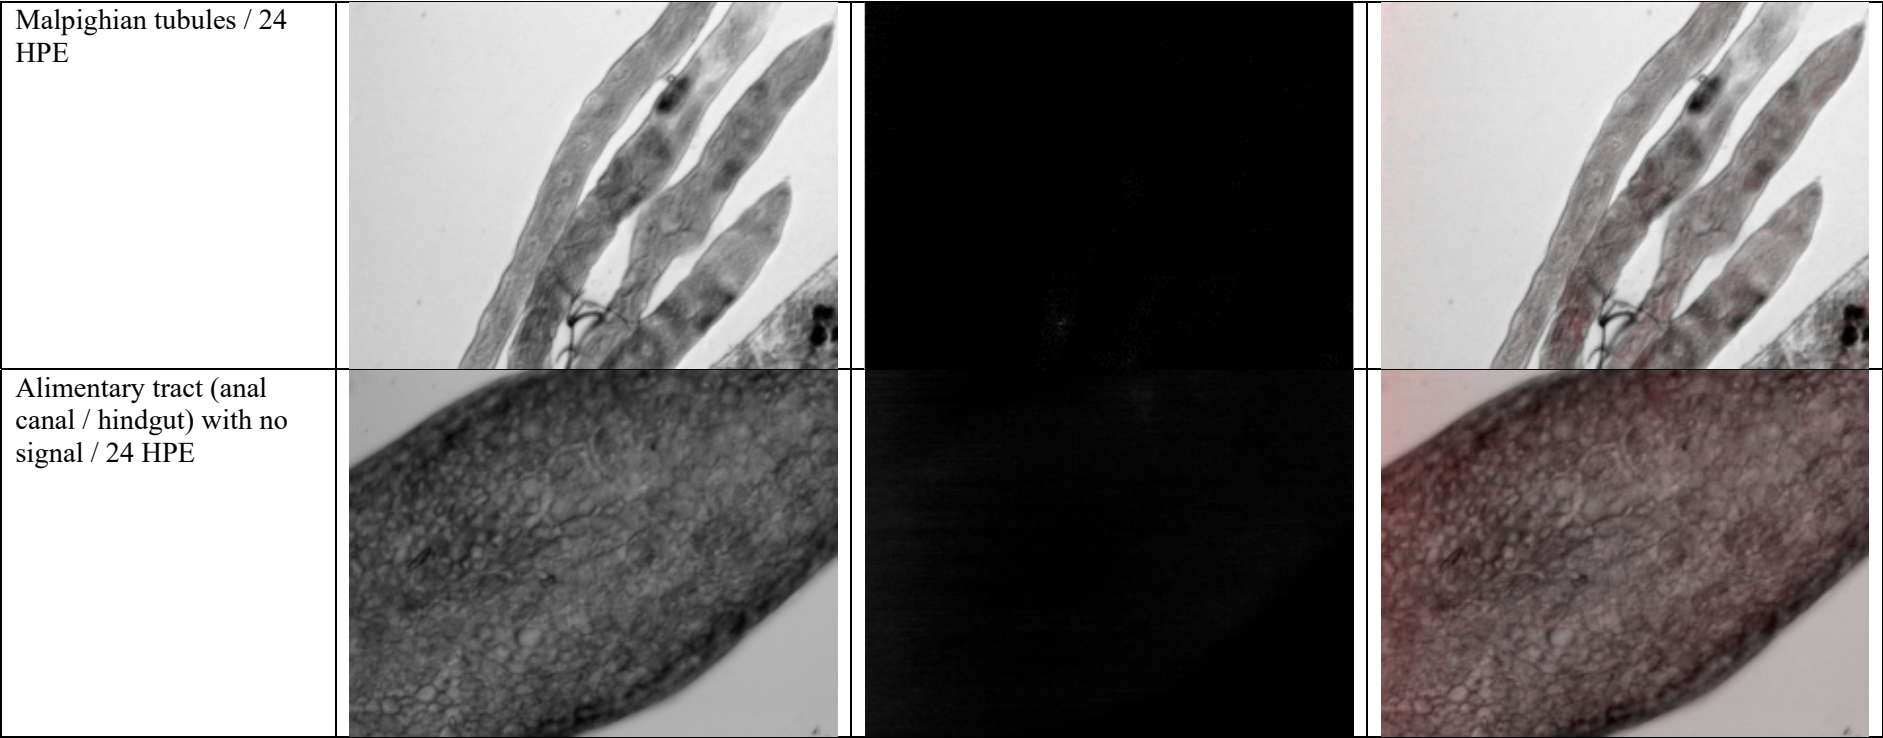

Figure S8 – 4<sup>th</sup> instar *An. gambiae* – intrathoracic injection

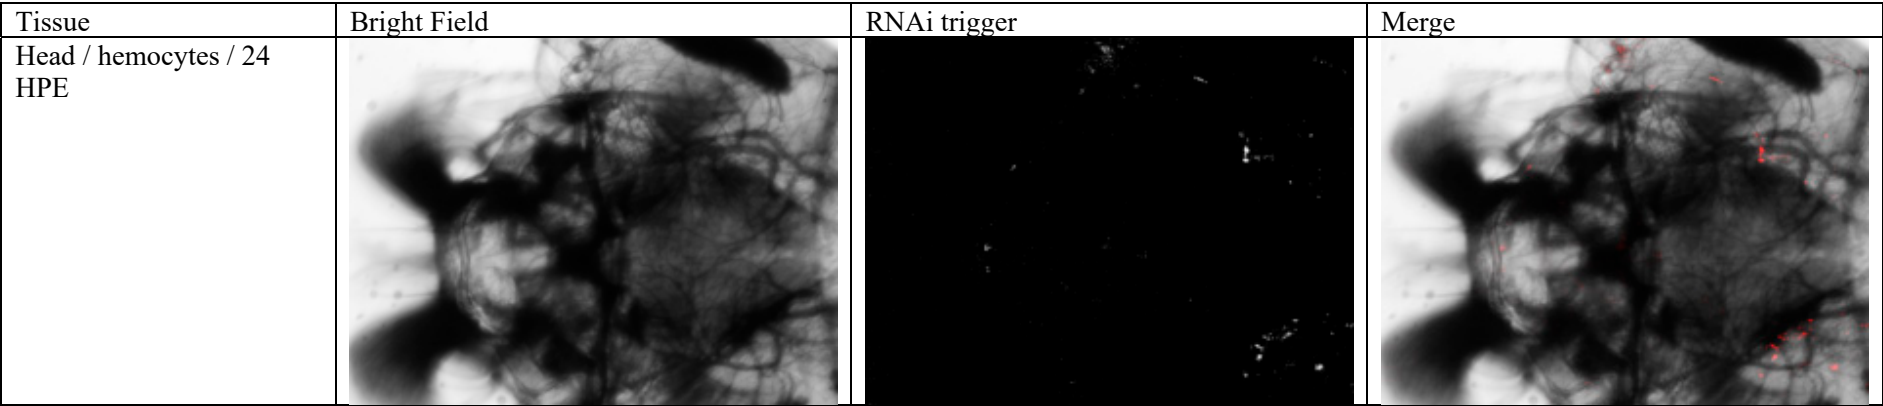

Abdomen / pericardial  
cells and hemocytes (see  
enhanced image below) /  
24 HPE

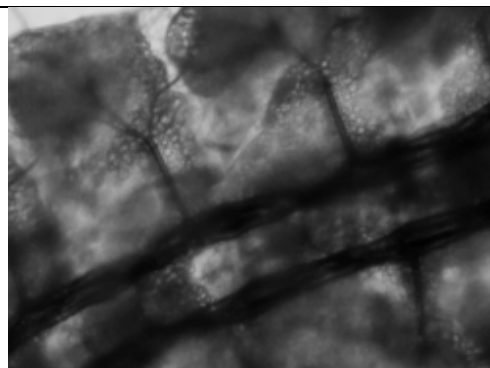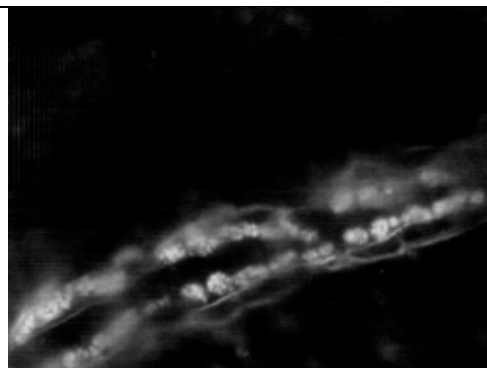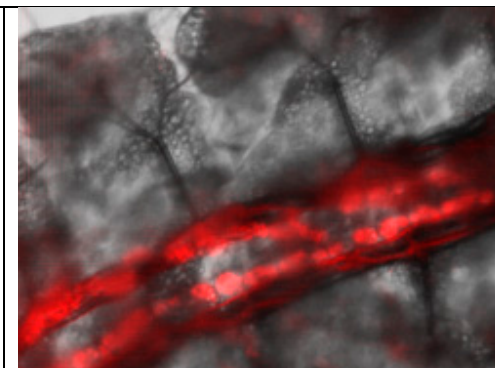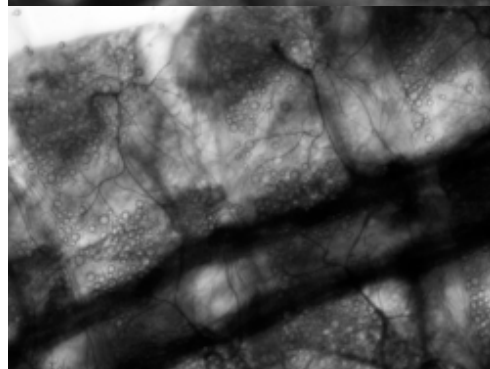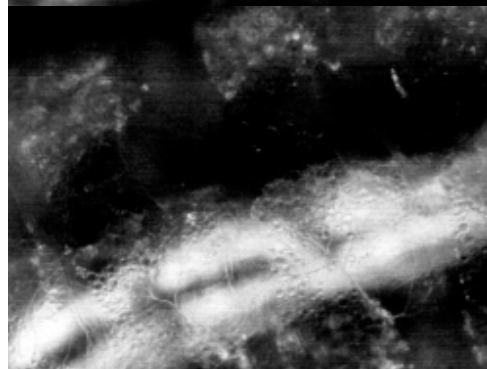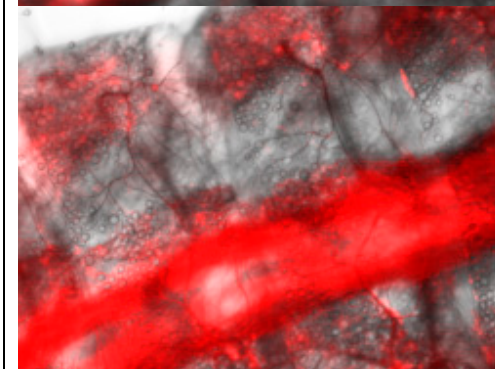

Abdomen / pericardial  
cells (single surviving  
adult at 120 HPE

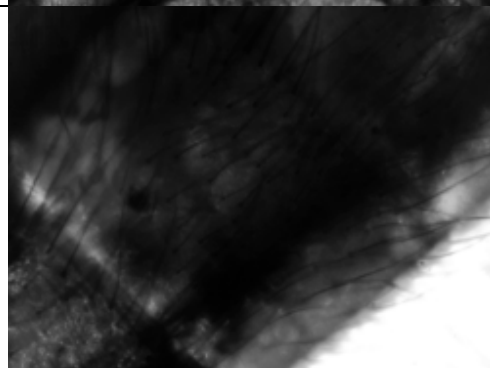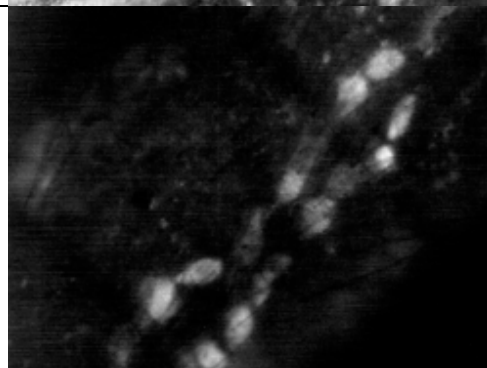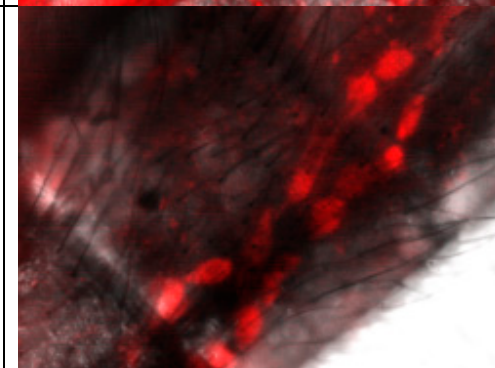



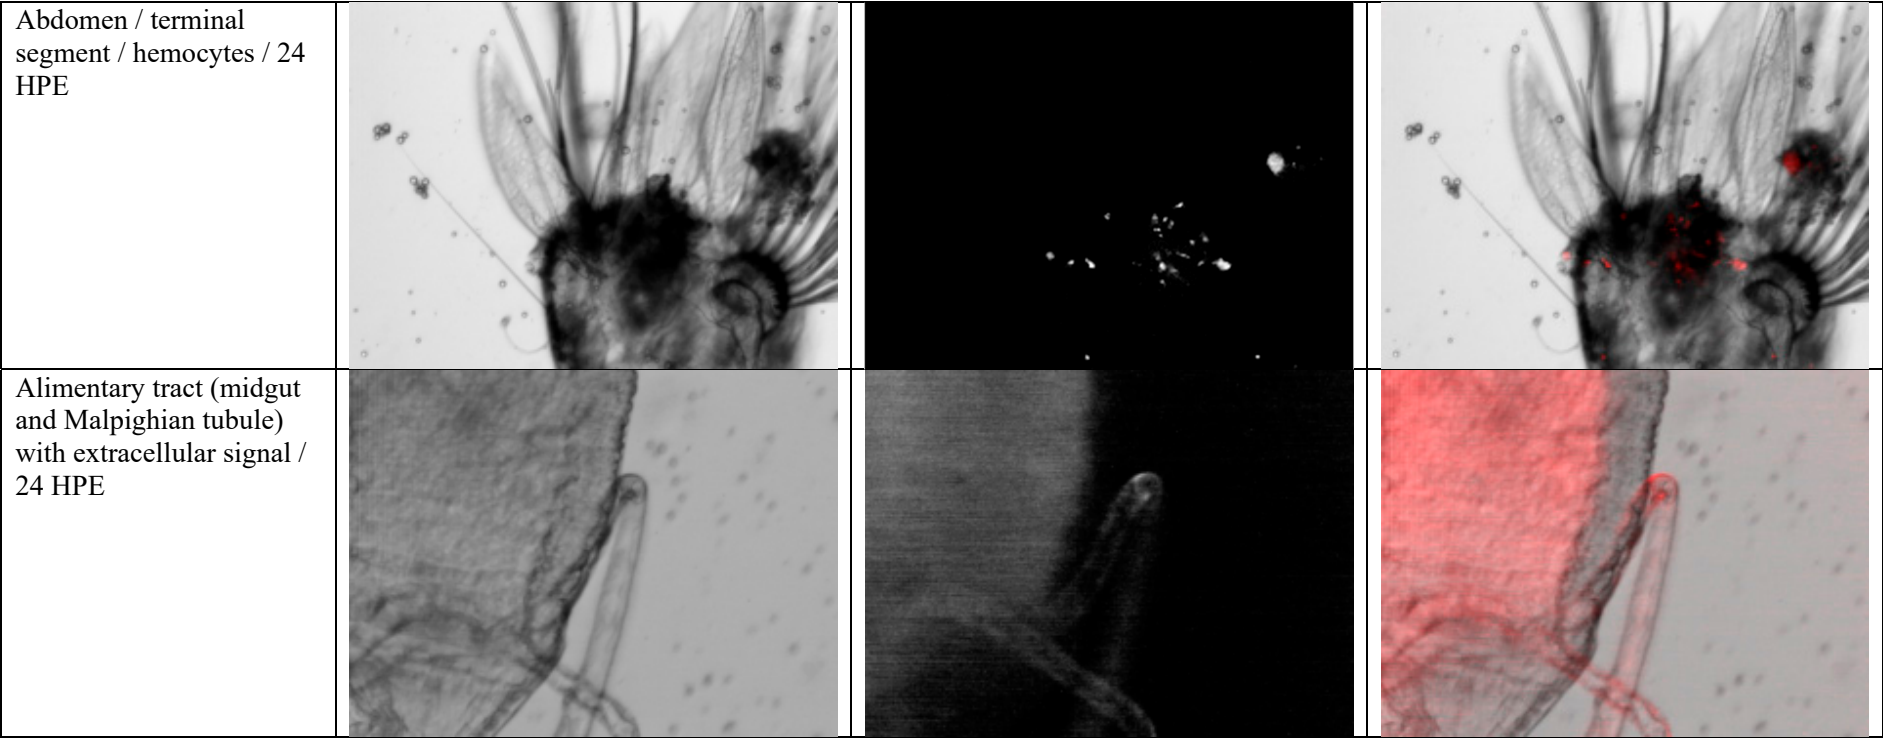

Figure S9 – 4<sup>th</sup> instar *Cx. pipiens* – intrathoracic injection

|        |              |              |       |
|--------|--------------|--------------|-------|
| Tissue | Bright Field | RNAi trigger | Merge |
|--------|--------------|--------------|-------|

|                                                          |                                                                                     |                                                                                      |                                                                                      |
|----------------------------------------------------------|-------------------------------------------------------------------------------------|--------------------------------------------------------------------------------------|--------------------------------------------------------------------------------------|
| Head / 24 HPE                                            | 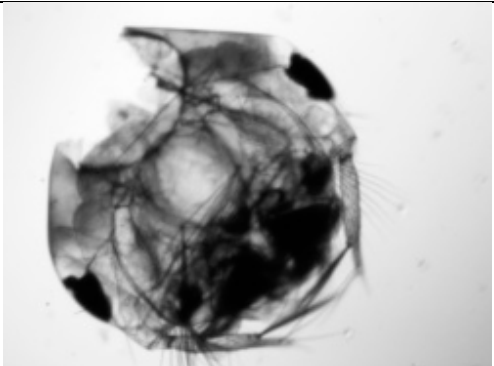  |   |   |
| Abdomen / pericardial cells / 24 HPE                     |   |   |   |
| Abdomen / pericardial cells in dissected tissue / 24 HPE |  |  |  |

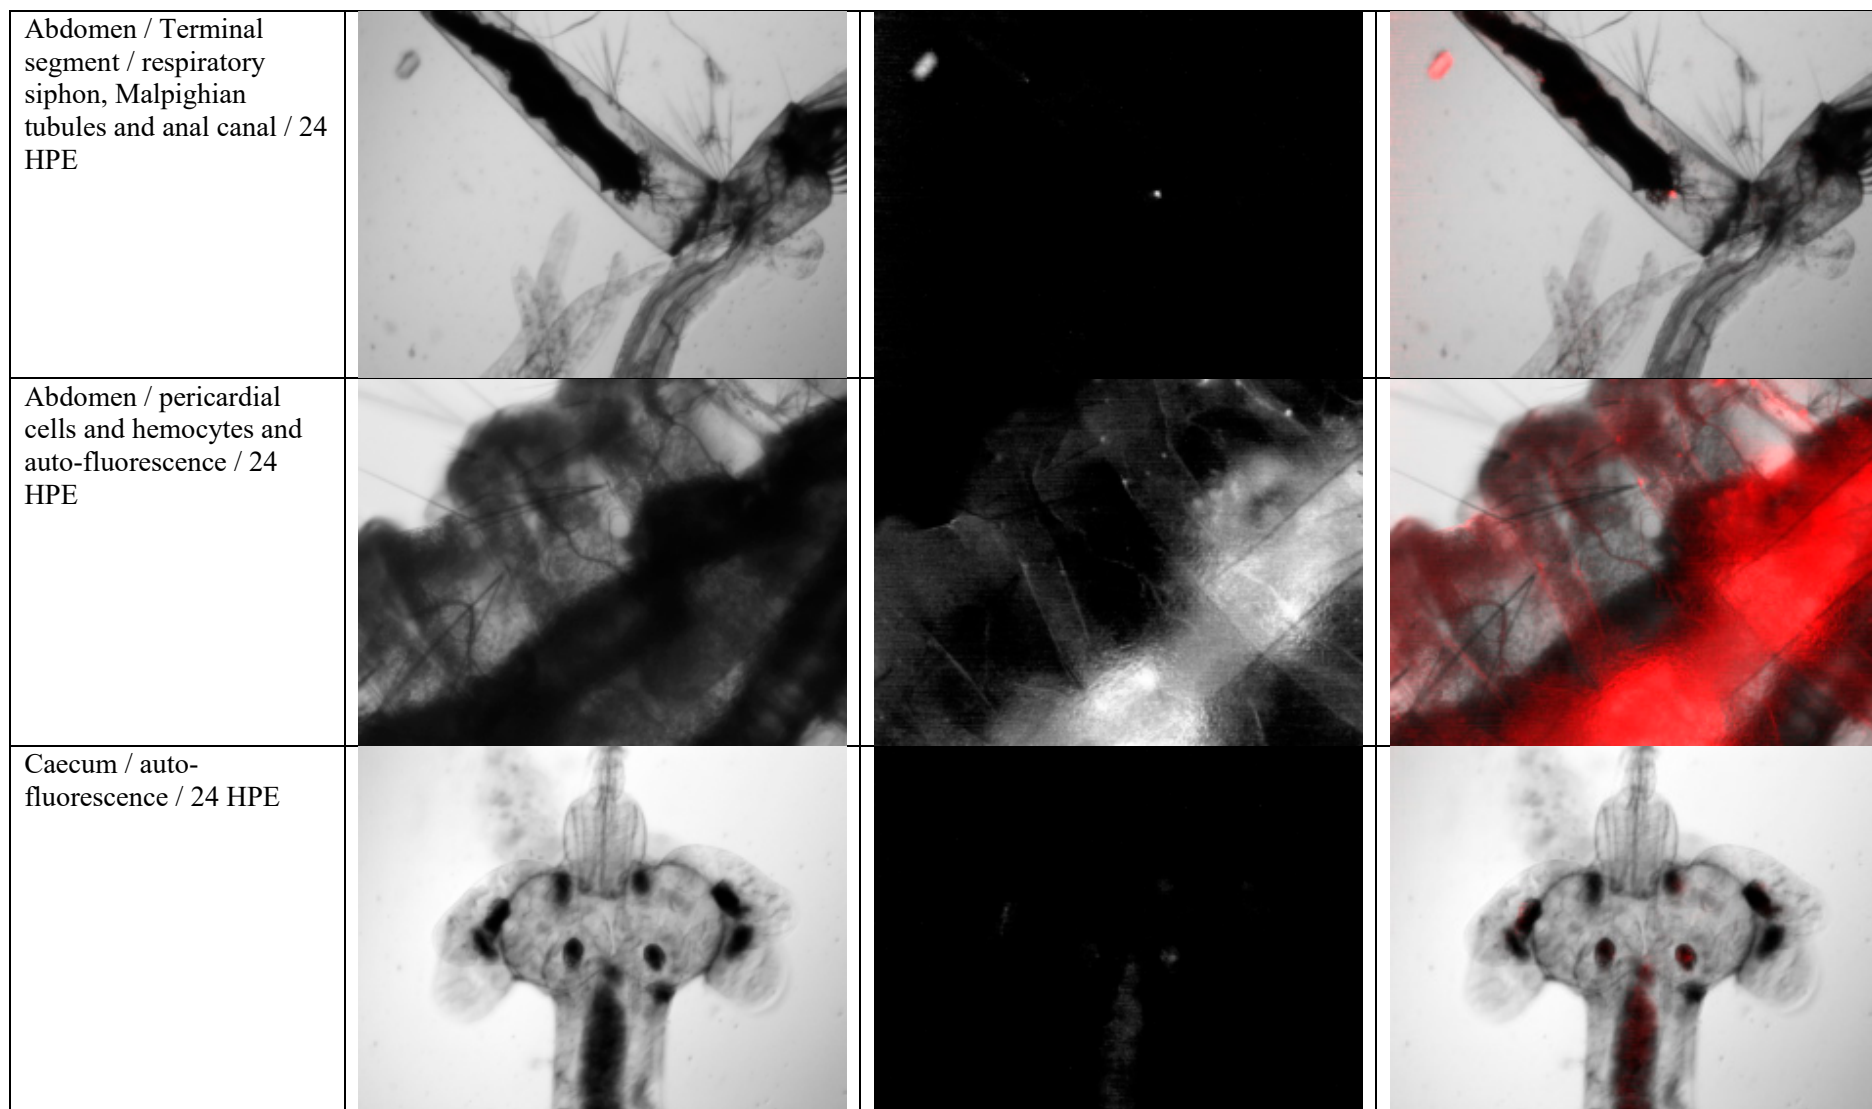

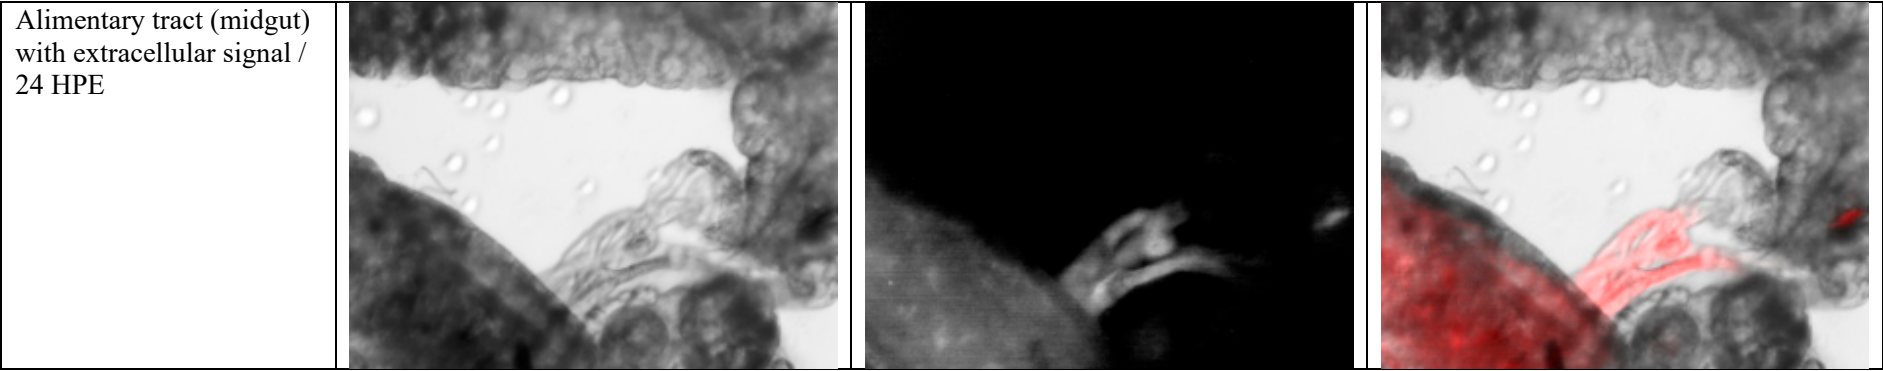

**Adult exposure by Topical Application**

Figure S10 – Adult female *Ae. aegypti* – topical exposure

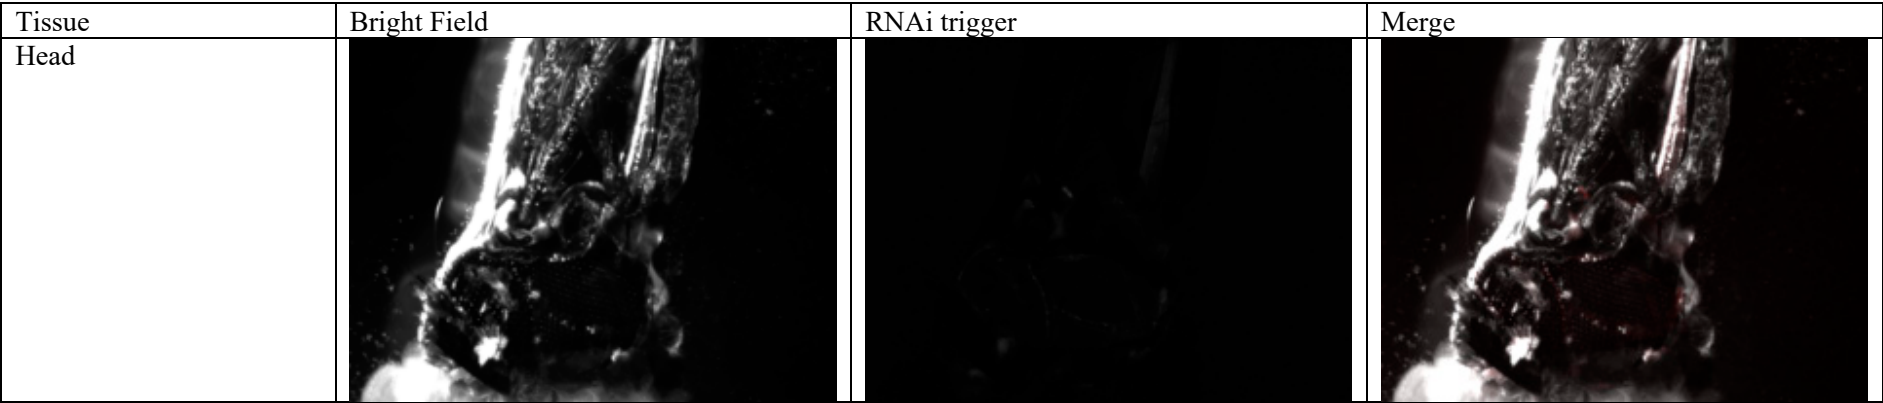



|                             |                                                                                     |                                                                                      |                                                                                      |
|-----------------------------|-------------------------------------------------------------------------------------|--------------------------------------------------------------------------------------|--------------------------------------------------------------------------------------|
| Abdomen / signal on cuticle | 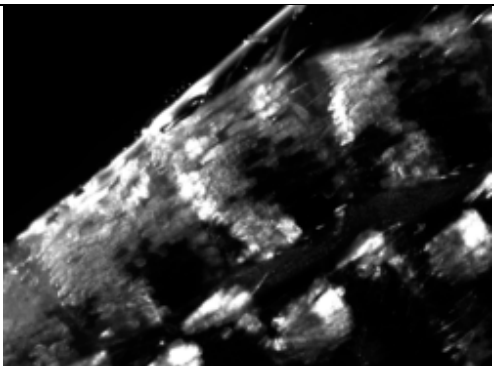  |   |   |
| Leg / signal on cuticle     |   |   |   |
| Leg / no signal             |  |  |  |

|                                                                              |                                                                                     |                                                                                      |                                                                                      |
|------------------------------------------------------------------------------|-------------------------------------------------------------------------------------|--------------------------------------------------------------------------------------|--------------------------------------------------------------------------------------|
| Alimentary tract (midgut and Malpighian tubules) with no signal              | 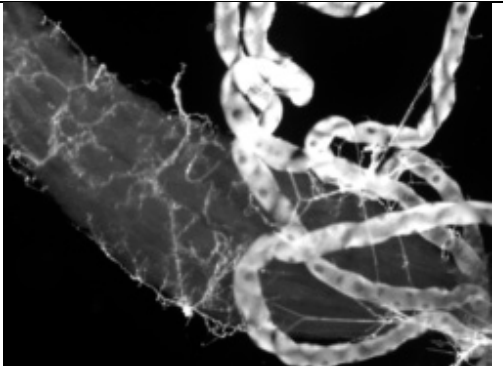  |   |   |
| Alimentary tract (midgut and Malpighian tubules) with no signal              |   |   |   |
| Alimentary tract (hindgut and Malpighian tubules) and ovaries with no signal |  |  |  |

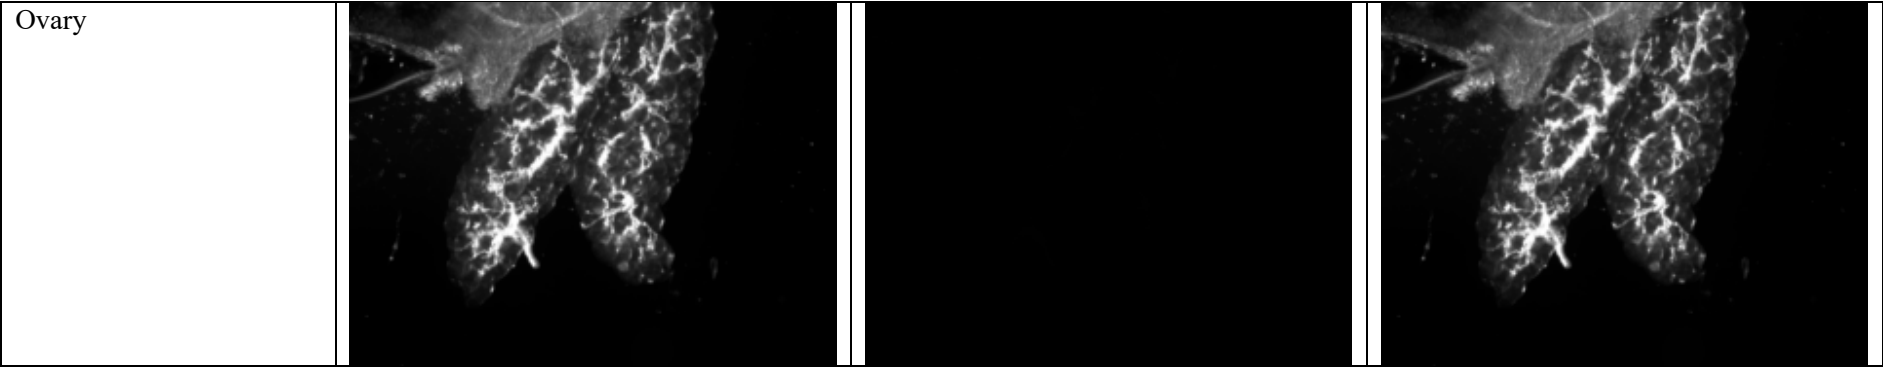

Figure S11 – Adult female *An. gambiae* – topical exposure

| Tissue                   | Bright Field                                                                         | RNAi trigger                                                                          | Merge                                                                                 |
|--------------------------|--------------------------------------------------------------------------------------|---------------------------------------------------------------------------------------|---------------------------------------------------------------------------------------|
| Head / auto-fluorescence |   |   |   |
| Abdomen / no signal      |  |  |  |

|                                                                          |                                                                                     |                                                                                      |                                                                                      |
|--------------------------------------------------------------------------|-------------------------------------------------------------------------------------|--------------------------------------------------------------------------------------|--------------------------------------------------------------------------------------|
| Abdomen / signal on cuticle                                              | 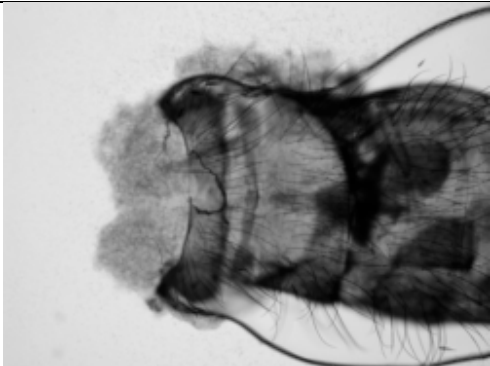  |   |   |
| Alimentary tract (midgut and Malpighian tubules) no signal               |   |   |   |
| Alimentary tract (foregut, midgut and Malpighian tubules) with no signal |  |  |  |



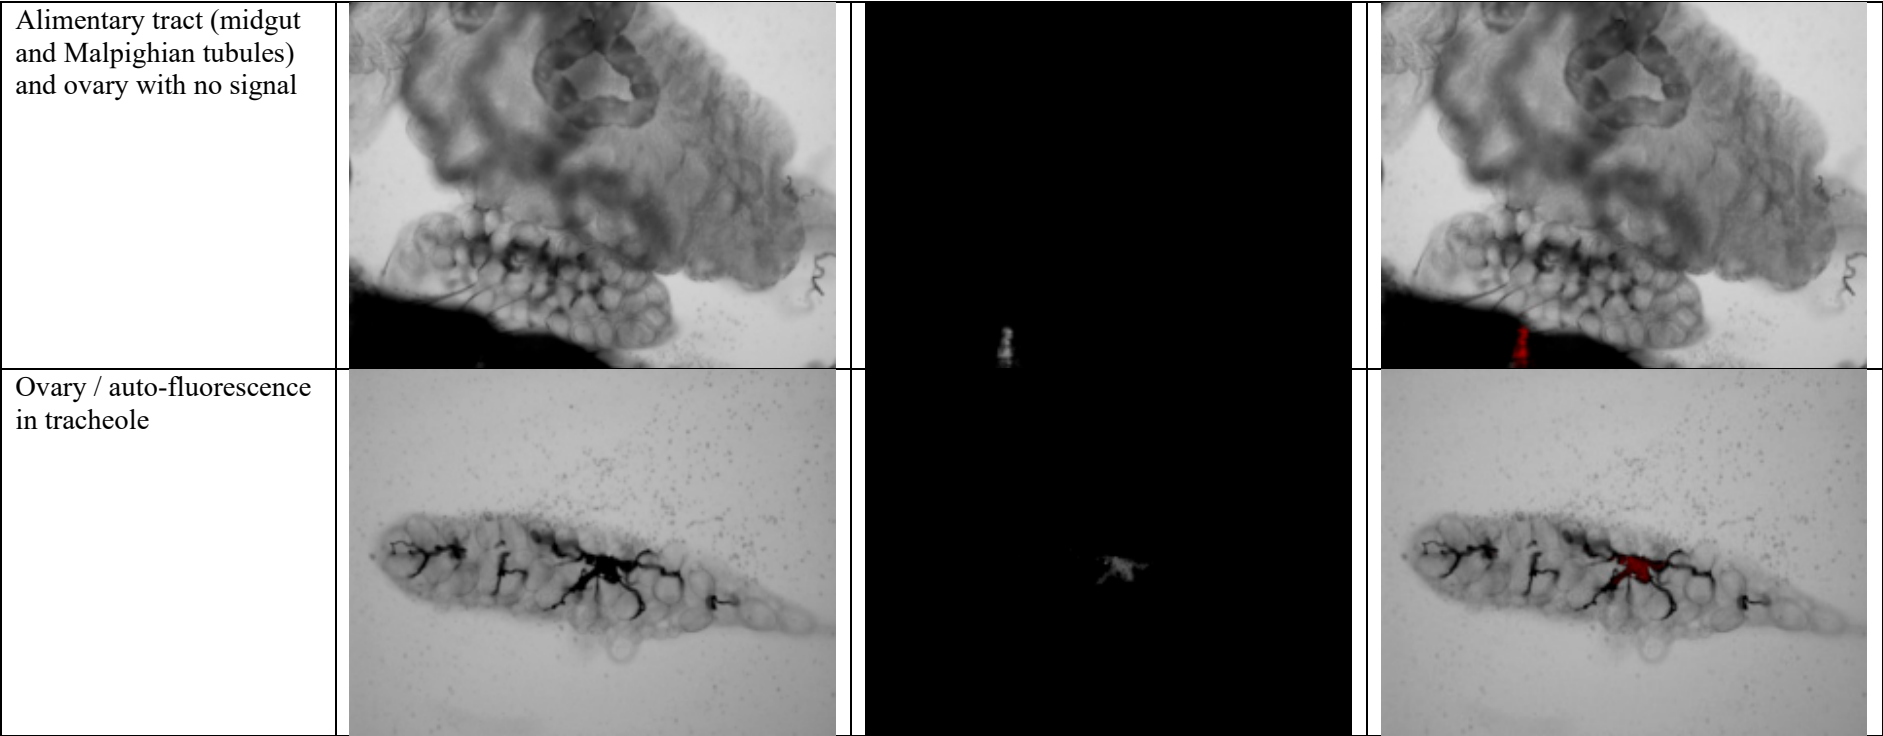

Figure S12 – Adult female *Cx. pipiens* – topical exposure

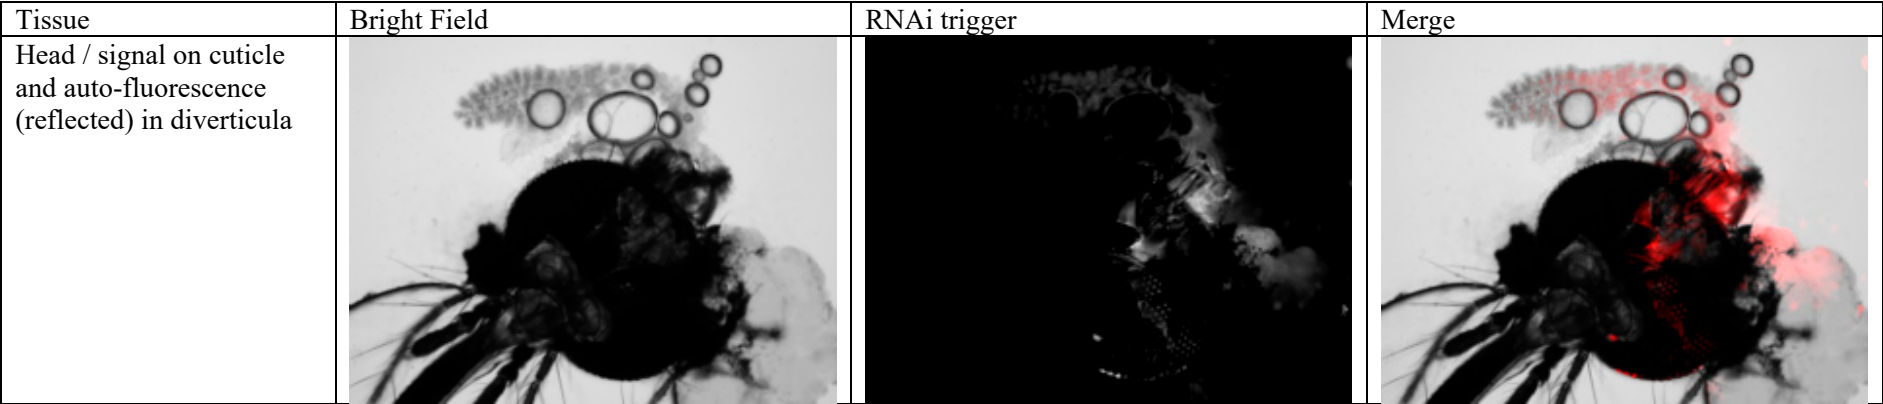

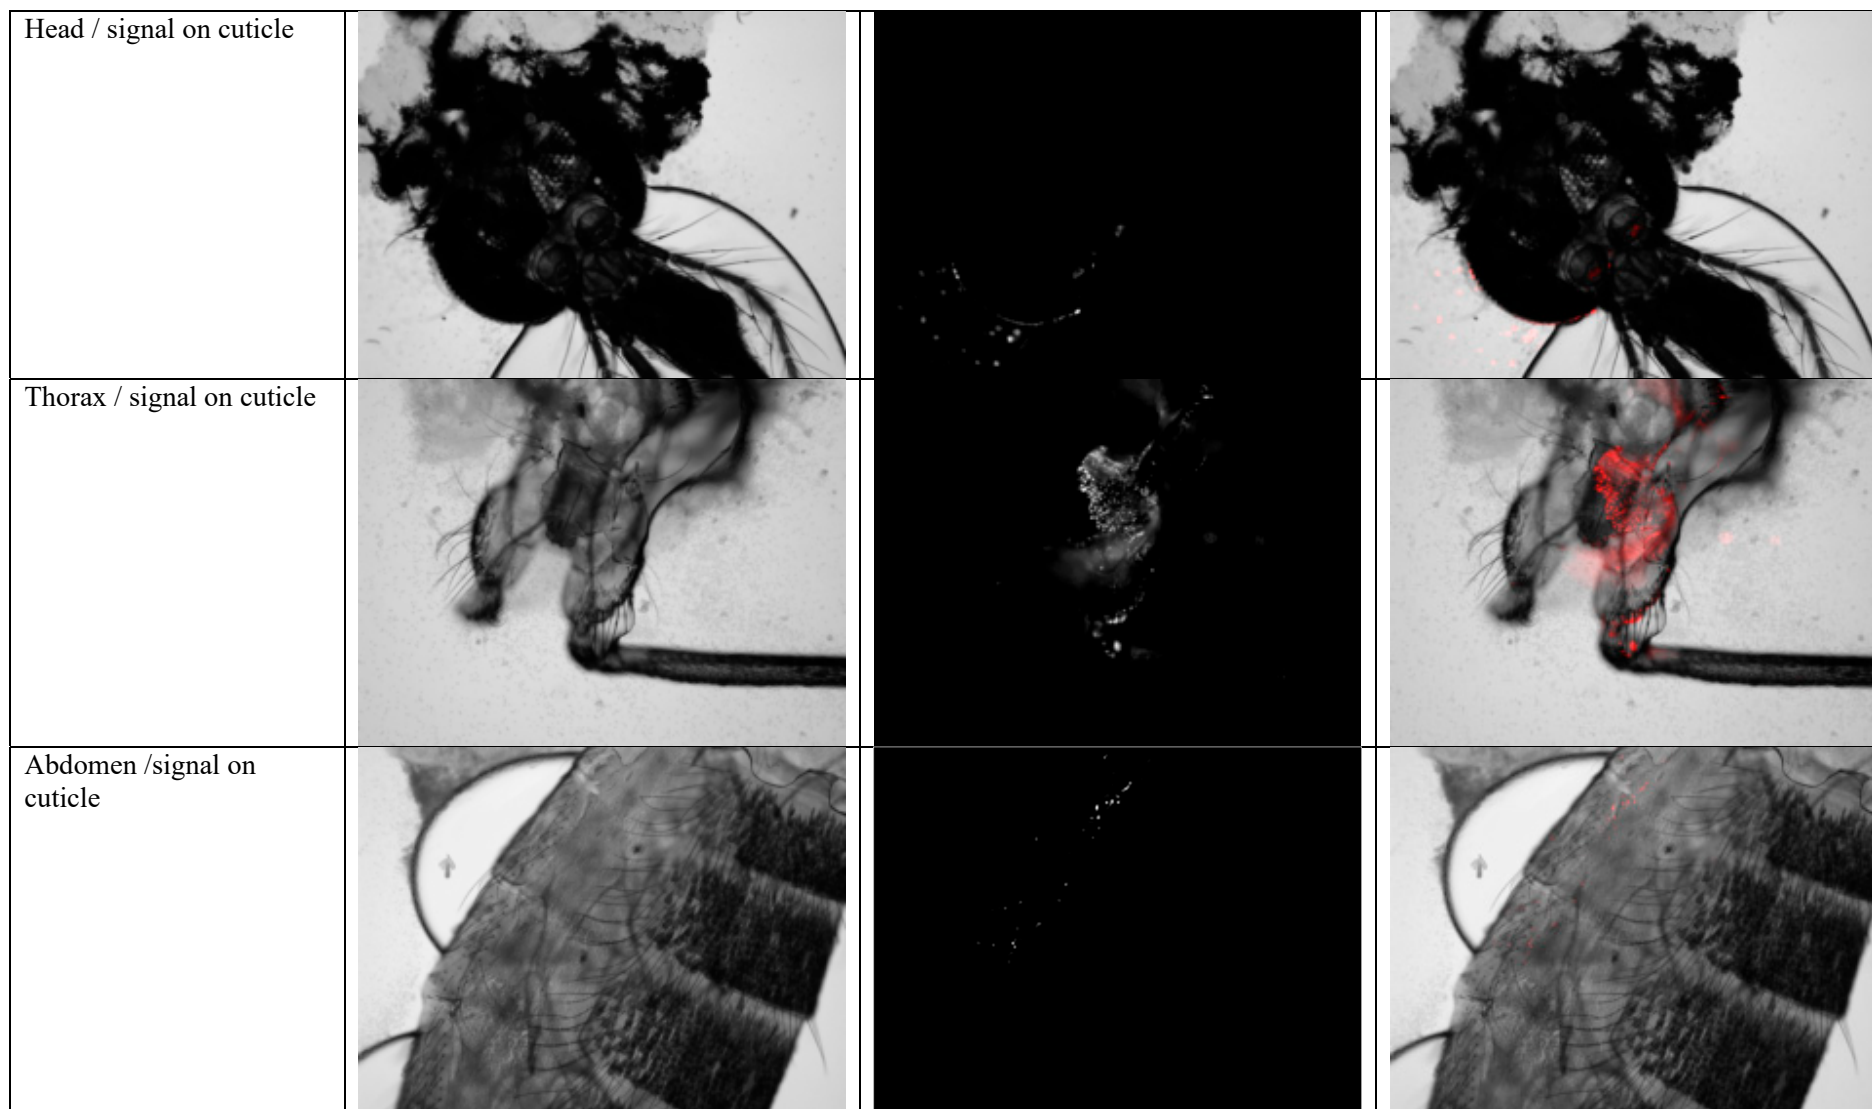

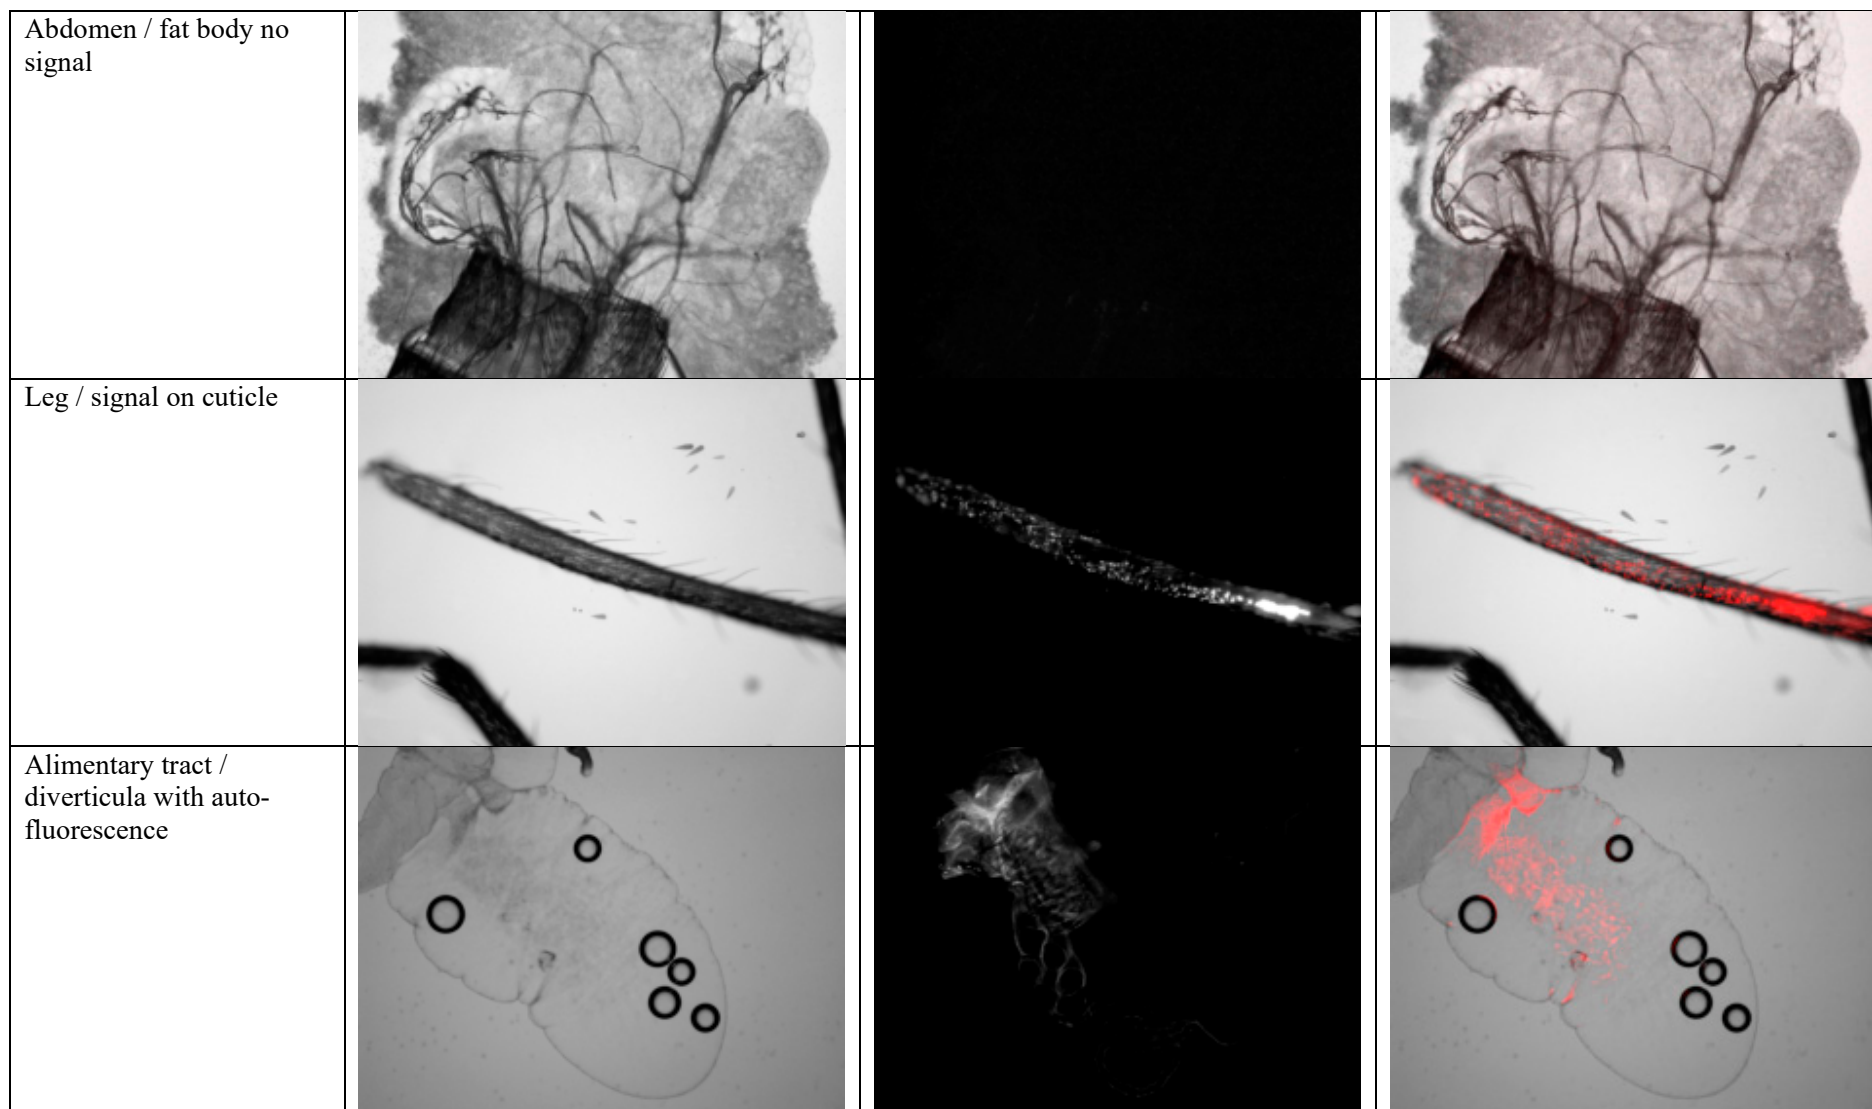

|                                                                                                                               |                                                                                     |                                                                                      |                                                                                      |
|-------------------------------------------------------------------------------------------------------------------------------|-------------------------------------------------------------------------------------|--------------------------------------------------------------------------------------|--------------------------------------------------------------------------------------|
| Alimentary tract (foregut, midgut and Malpighian tubules) with no signal                                                      |   |   |   |
| Alimentary tract (hindgut) and ovaries, fluorescent bubble in hindgut lumen probable auto-fluorescence                        |   |   |   |
| Abdomen / signal on cuticle and alimentary tract (hindgut, rectum, and Malpighian tubules) with auto-fluorescence (reflected) |  |  |  |



Adult exposure *Per os*

Figure S13 – Adult female *Ae. aegypti* – *per os*

| Tissue                                   | Bright Field                                                                         | RNAi trigger                                                                          | Merge                                                                                 |
|------------------------------------------|--------------------------------------------------------------------------------------|---------------------------------------------------------------------------------------|---------------------------------------------------------------------------------------|
| Head / signal at injection site / 24 HPE | 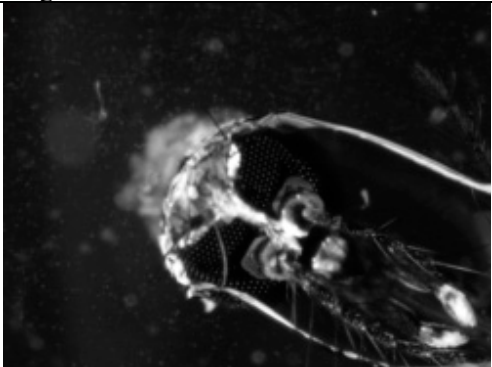   |    |    |
| Thorax / auto-fluorescence / 72 HPE      |   |   |   |
| Thorax / no signal / 72 HPE              |  |  |  |

|                                                           |                                                                                     |                                                                                      |                                                                                      |
|-----------------------------------------------------------|-------------------------------------------------------------------------------------|--------------------------------------------------------------------------------------|--------------------------------------------------------------------------------------|
| Abdomen / pericardial cells around dorsal vessel / 72 HPE | 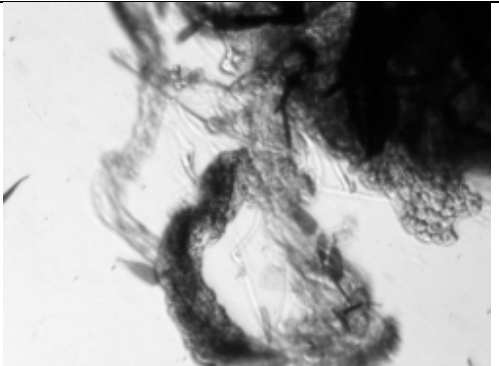  |   |   |
| Abdomen / no signal / 120 HPE                             |   |   |   |
| Diverticula with strong diffuse signal / 24 HPE           |  |  |  |

|                                                                                           |                                                                                     |                                                                                      |                                                                                      |
|-------------------------------------------------------------------------------------------|-------------------------------------------------------------------------------------|--------------------------------------------------------------------------------------|--------------------------------------------------------------------------------------|
| Diverticula with no signal / 120 HPE                                                      | 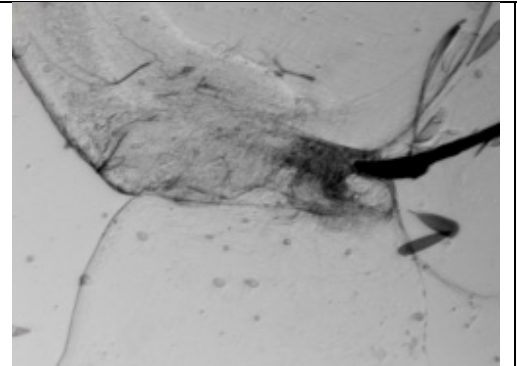  |   |   |
| Alimentary tract / foregut with extracellular signal / 24 HPE                             |   |   |   |
| Alimentary tract (foregut, midgut, Malpighian tubules) with extracellular signal / 24 HPE |  |  |  |

|                                                                           |                                                                                     |                                                                                      |                                                                                      |
|---------------------------------------------------------------------------|-------------------------------------------------------------------------------------|--------------------------------------------------------------------------------------|--------------------------------------------------------------------------------------|
| Alimentary tract (foregut, midgut, Malpighian tubules) no signal / 24 HPE | 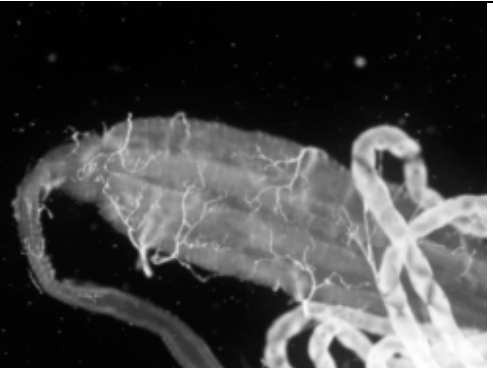  |   |   |
| Alimentary tract / Malpighian tubules, no signal (72 HPE                  |   |   |   |
| Alimentary tract / rectum, no signal / 120 HPE                            |  |  |  |



|                                                         |                                                                                     |  |                                                                                      |
|---------------------------------------------------------|-------------------------------------------------------------------------------------|--|--------------------------------------------------------------------------------------|
| Ovary / no signal / 24<br>HPE                           | 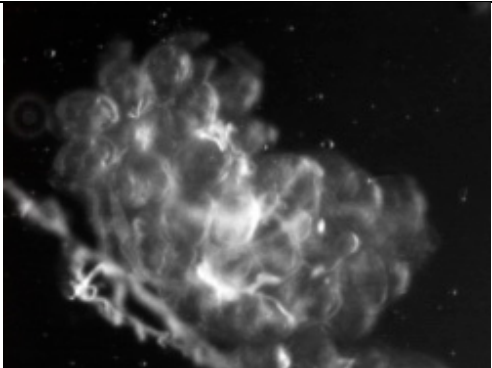  |  |   |
| Ovary and Malpighian<br>tubules / no signal / 72<br>HPE |   |  |   |
| Ovary / no signal / 120<br>HPE                          |  |  |  |

Figure S14 – Adult female *Cx. pipiens* – *per os*

| Tissue                                   | Bright Field                                                                         | RNAi trigger                                                                          | Merge                                                                                 |
|------------------------------------------|--------------------------------------------------------------------------------------|---------------------------------------------------------------------------------------|---------------------------------------------------------------------------------------|
| Head / signal at injection site / 24 HPE |    |    |    |
| Head / hemocytes / 72 HPE                |   |   |   |
| Thorax / hemocytes / 72 HPE              |  |  |  |

|                                                |                                                                                     |                                                                                      |                                                                                      |
|------------------------------------------------|-------------------------------------------------------------------------------------|--------------------------------------------------------------------------------------|--------------------------------------------------------------------------------------|
| Thorax / hemocytes near muscle tissue / 72 HPE | 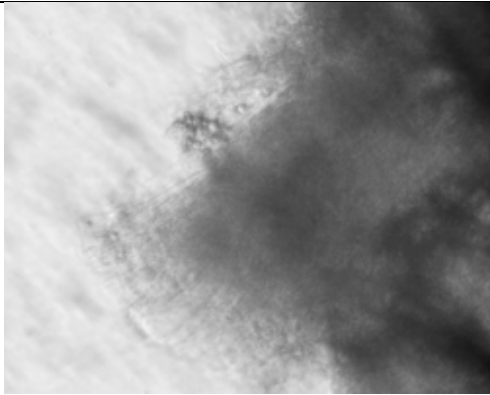  |   |   |
| Abdomen / pericardial cells / 24 HPE           |   |   |   |
| Abdomen / no signal / 120 HPE                  |  |  |  |

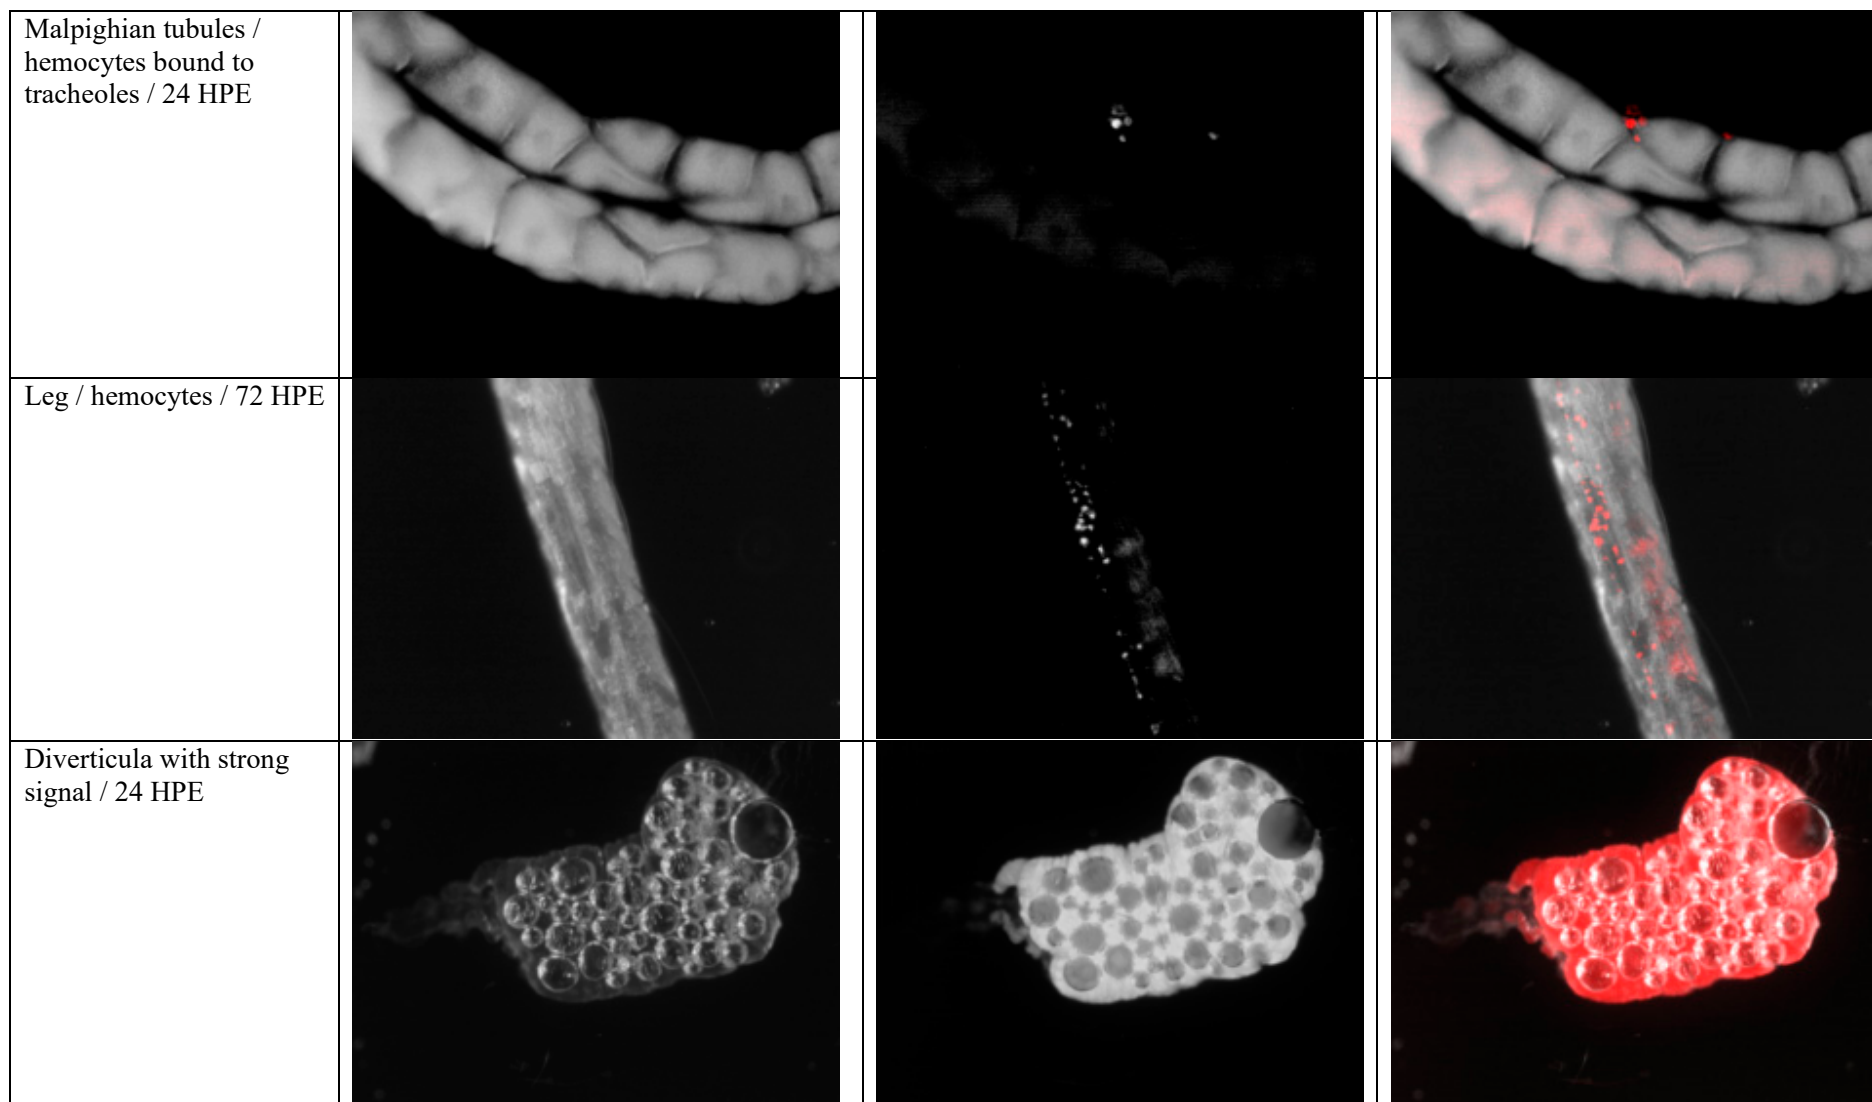



|                                                |                                                                                     |                                                                                      |                                                                                      |
|------------------------------------------------|-------------------------------------------------------------------------------------|--------------------------------------------------------------------------------------|--------------------------------------------------------------------------------------|
| Foregut / punctate staining in tissue / 72 HPE | 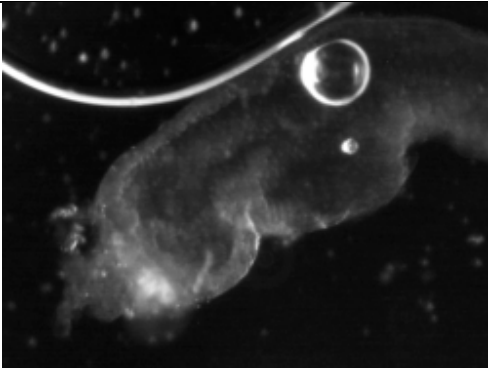  |   |   |
| Foregut lumen / 72 HPE                         |   |   |   |
| Alimentary tract with strong midgut / 24 HPE   |  |  |  |

|                                                                                                            |                                                                                     |                                                                                      |                                                                                      |
|------------------------------------------------------------------------------------------------------------|-------------------------------------------------------------------------------------|--------------------------------------------------------------------------------------|--------------------------------------------------------------------------------------|
| Alimentary tract with strong midgut and foregut / 72 HPE                                                   | 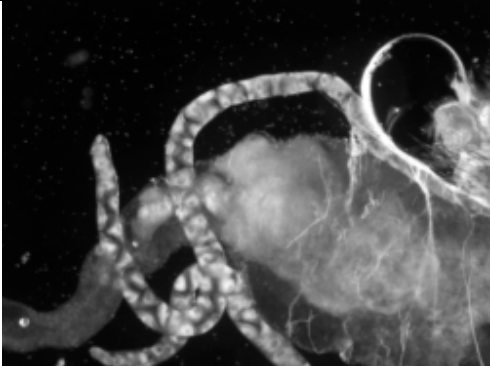  |   |   |
| Hindgut lumen and ovaries / 24 HPE * a color version of this image was included to demonstrate visible Cy3 |   |   |   |
| Ovary / hemocytes / 72 HPE                                                                                 |  |  |  |

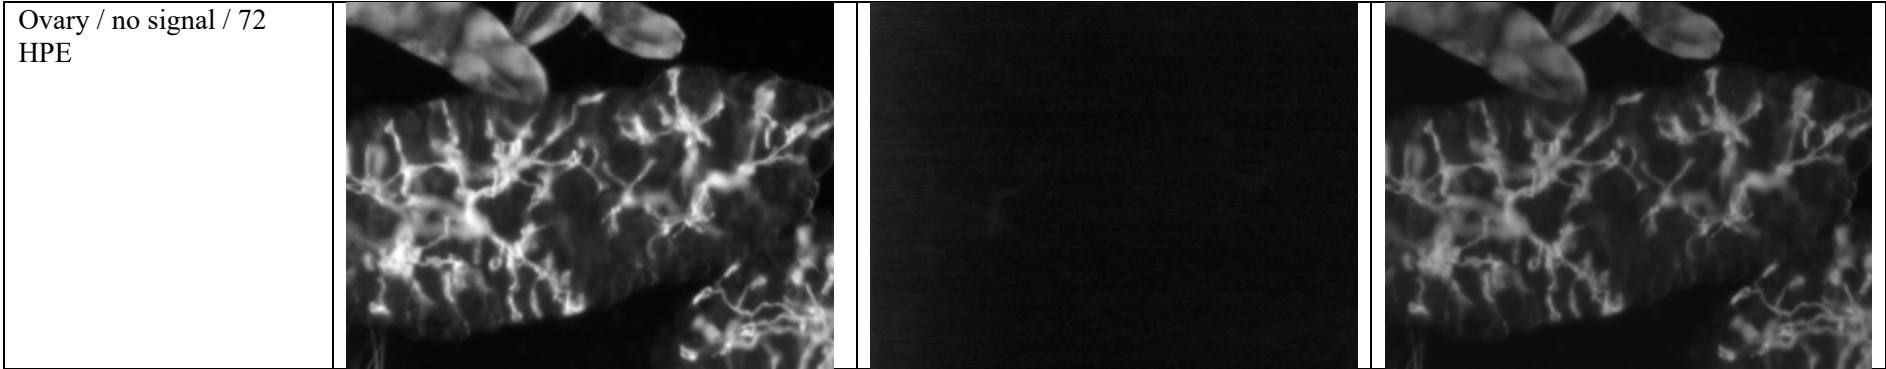

**Larval exposure by Soaking**

Figure S15 – 1<sup>st</sup> instar *Ae. aegypti* - soaking

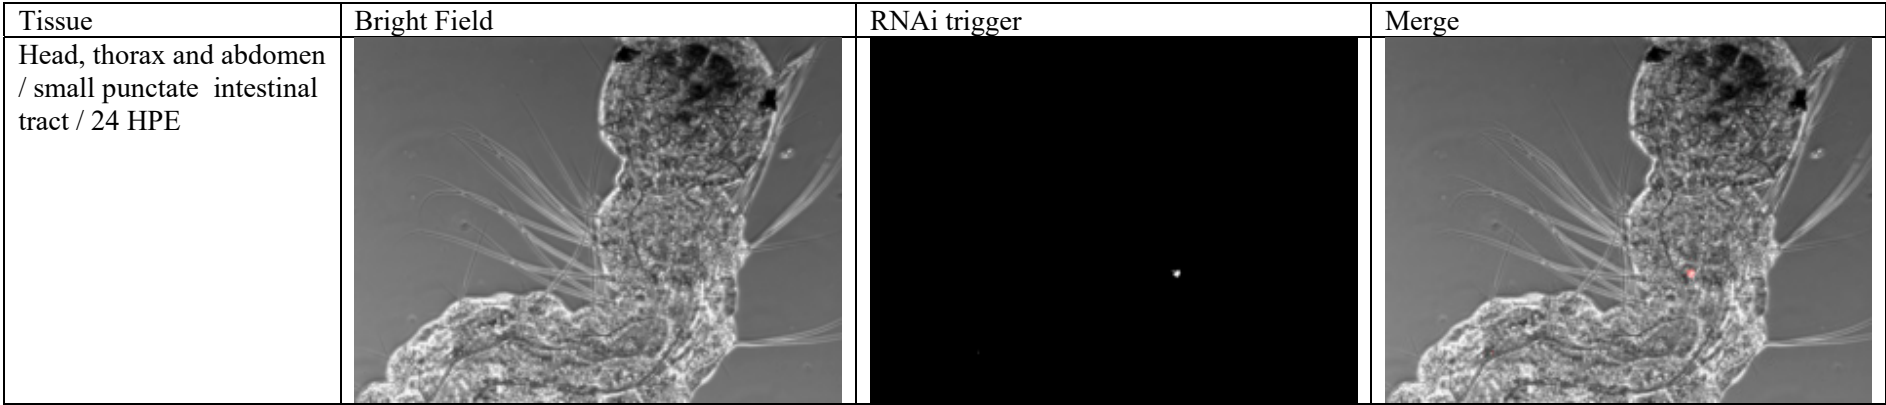

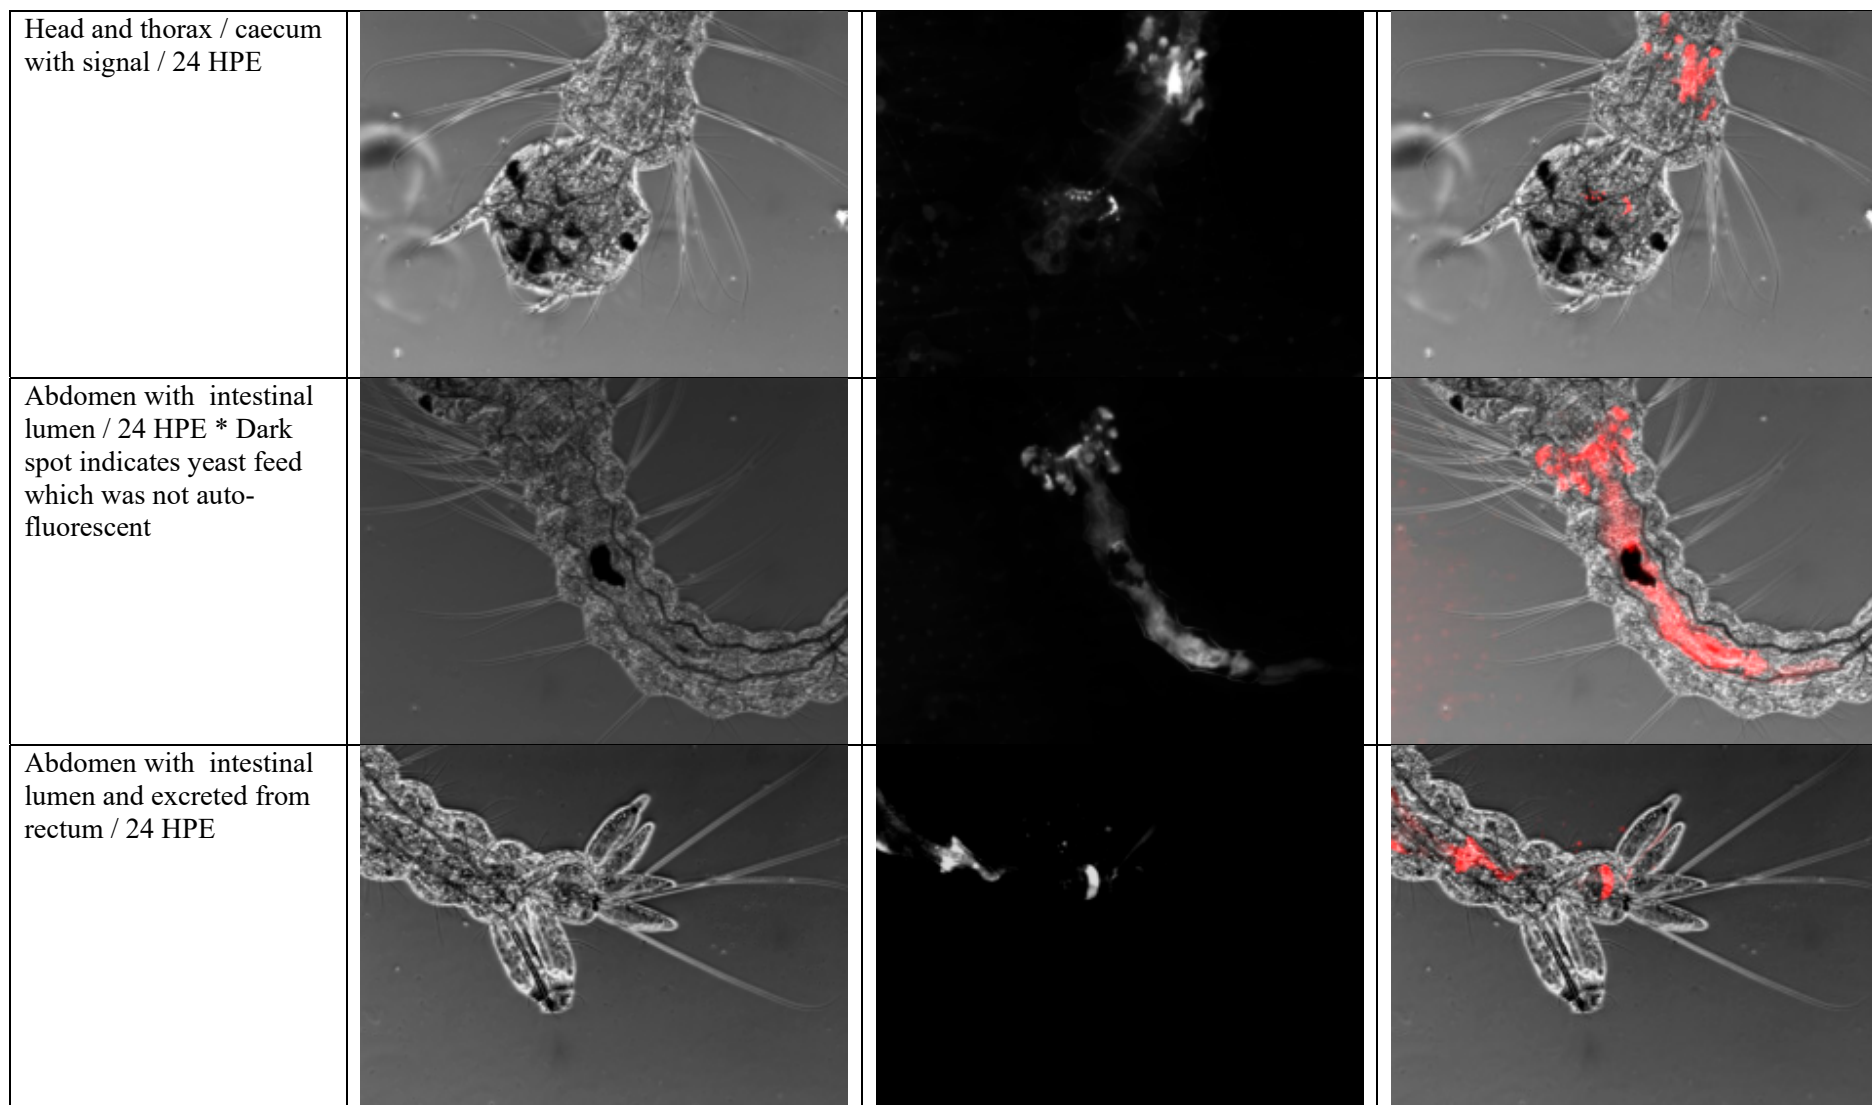



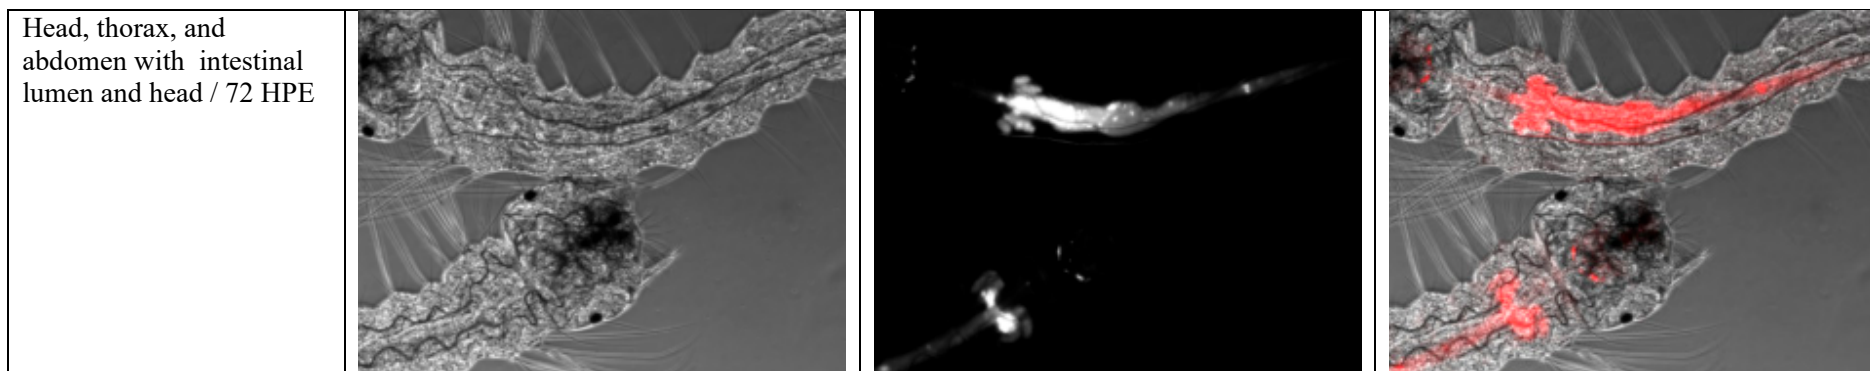

**Figure S16 – Stability of iLacZ in sucrose meal following exposure to *Ae. aegypti* in insectary conditions.**

iLacZ does not degrade following exposure to mosquitoes in sucrose solutions. Sucrose solutions containing 1 mg/ml iLacZ were incubated for 12 hours in insectary conditions in a: closed micro/centrifuge tube (closed), open micro/centrifuge tube lid (open), or an open micro/centrifuge tube lid in a carton of 20 starved adult female *Ae. aegypti* (open + *Ae. aegypti*). Integrity of iLacZ was measured by band intensity following gel electrophoresis compared to frozen iLacZ stock. No significant differences were detected between groups as measured by one way ANOVA.

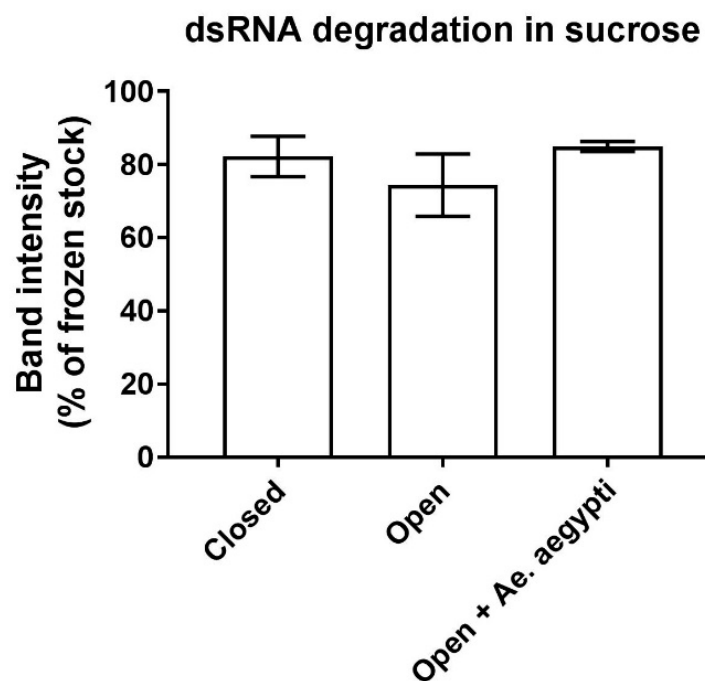

**Figure S17 – Confocal Z/stack of *Ae. aegypti* ovary 24 hours post peritoneal exposure of fluorescent/iLacZ.**

iLacZ uptake assessed by confocal microscopy in non/bloodfed *Ae. aegypti* ovaries. Cross section stack (Z/stack) of *Ae. aegypti* ovaries 24 hours post injection with labelled iLacZ showing DAPI stained nuclei (blue) and Cy5 labelled iLacZ (magenta).

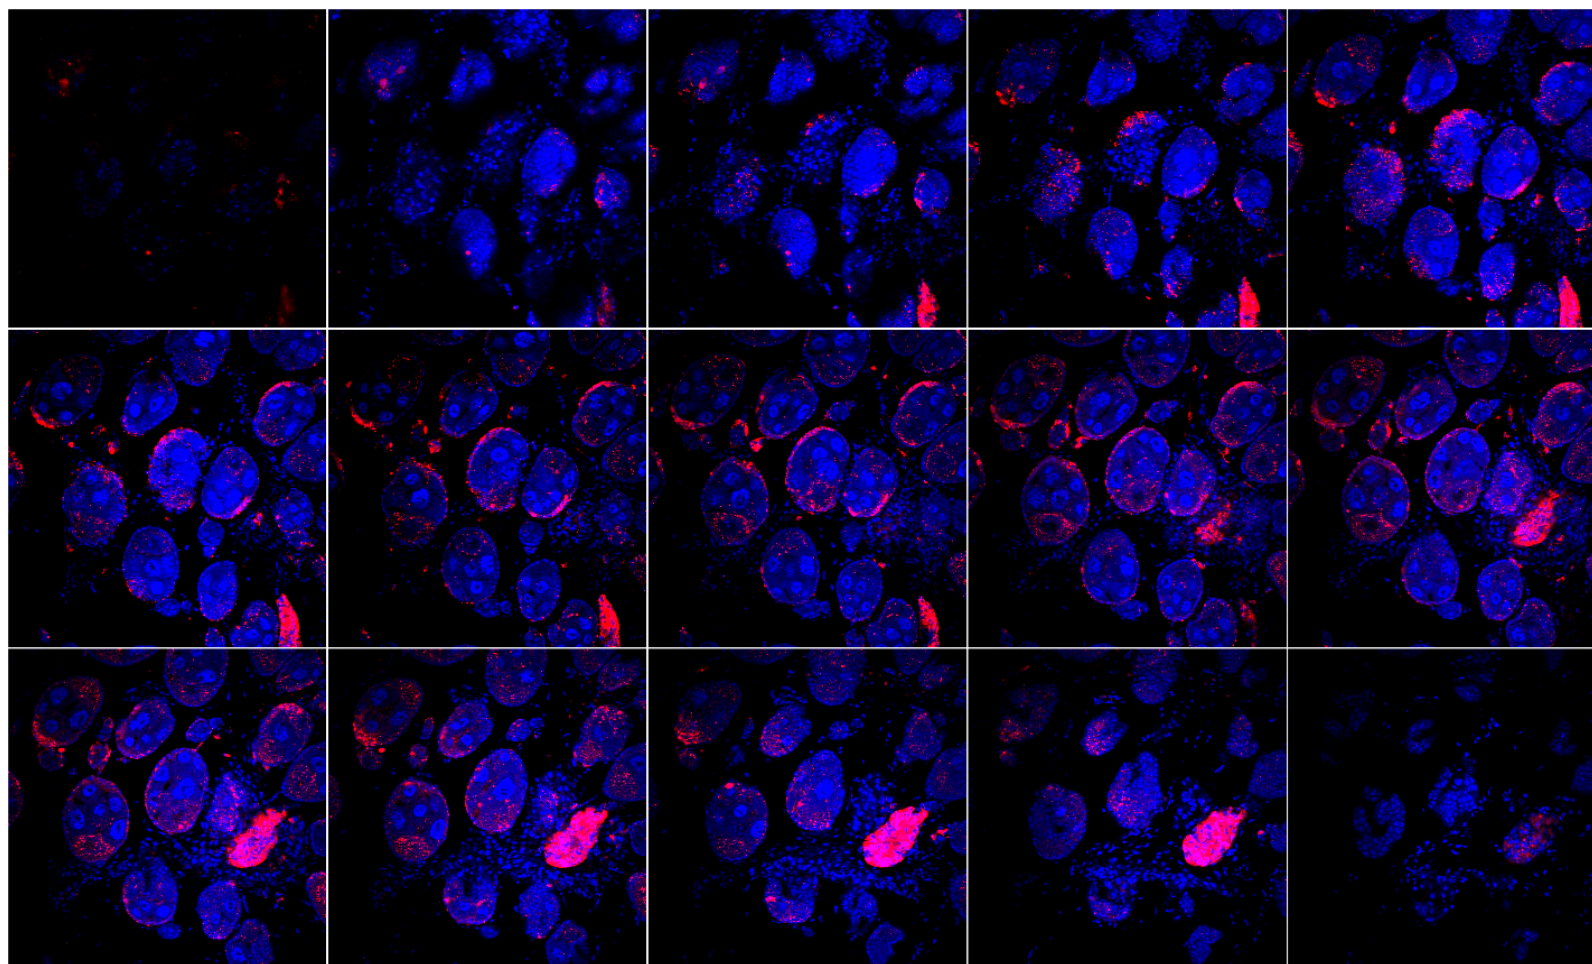

**Figure S18 – Northern blot time-course of C6/36 cells following iLacZ exposure.**

Persistence of a 377 base-pair iLacZ tracked by Northern blot following exposure to *Ae. albopictus* C6/36 cells. Cell extracts (1 µg) were tested at 0.25, 1, 24, and 72 hours post exposure against a 400 bp iLacZ RNA probe (iL). Ribosomal RNA loading controls (LC) are shown from *Ae. albopictus* RNA extracts imaged immediately prior to Northern membrane transfer.

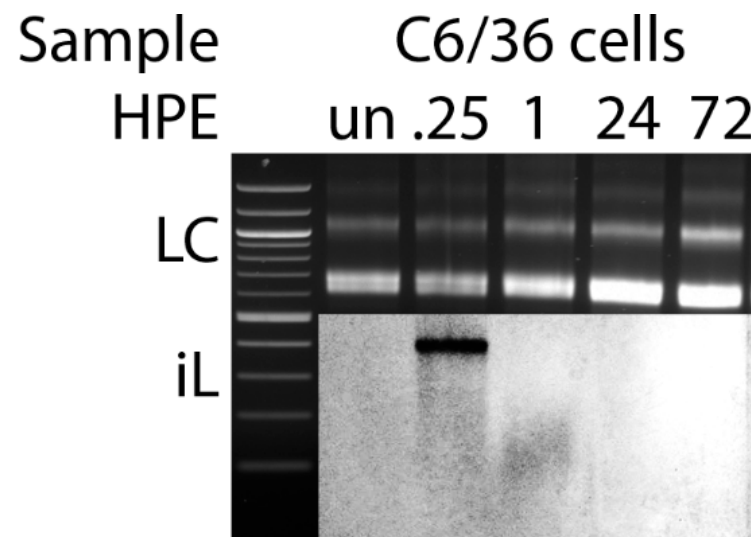

Supplement: s1 [file s1]
